# Supplementary material for: Reversal of enantioselectivity in cobalt(ii)-catalyzed asymmetric Michael–alkylation reactions: synthesis of spiro-cyclopropane-oxindoles
Source: Royal Society of Chemistry journal article supplement (doi:10.1039/d4qo00681j), 2024-01-01
Supplement: d4qo00681j1.pdf [file d4qo00681j1.pdf]

## Supporting Information:

# Reversal of Enantioselectivity in Cobalt(II)-Catalyzed Asymmetric Michael–Alkylation Reactions: Synthesis of Spiro-Cyclopropane-Oxindoles

Jun-Hao Zhang<sup>a</sup>, Wei-Jing Yang<sup>a</sup>, Ning Li<sup>a</sup>, Yin Tian,<sup>\*b</sup> Ming-Sheng Xie,<sup>\*a</sup> and Hai-Ming Guo<sup>\*a</sup>

<sup>a</sup>State Key Laboratory of Antiviral Drugs, Pingyuan Laboratory, Key Laboratory of Green Chemical Media and Reactions, Ministry of Education, Collaborative Innovation Center of Henan Province for Green Manufacturing of Fine Chemicals, School of Chemistry and Chemical Engineering, Henan Normal University, Xinxiang, Henan 453007, China. Email: xiemingsheng@htu.edu.cn; ghm@htu.edu.cn

<sup>b</sup>State Key Laboratory of Southwestern Chinese Medicine Resources, School of Pharmacy, Chengdu University of Traditional Chinese Medicine, Chengdu 611137, China. Email: ytian227@outlook.com

### Contents

|                                                                                  |           |
|----------------------------------------------------------------------------------|-----------|
| General information                                                              | S2        |
| Synthesis of the chiral ligand <b>L11</b>                                        | S3        |
| General procedures for the preparation of substrates                             | S3-S4     |
| Optimization of the reaction conditions                                          | S5-S6     |
| Catalytic asymmetric Michael–Alkylation reactions                                | S7-S21    |
| General procedure for the synthesis of spiro-cyclopropane-oxindoles <b>6a-6c</b> | S22-S24   |
| Gram-scale synthesis of <b>3a</b>                                                | S25-S26   |
| Nonlinear effect experiment                                                      | S27-S31   |
| Transformation of the product <b>3a</b>                                          | S32-S34   |
| X-ray data of <b>8a</b> and <b>10a</b>                                           | S35-S38   |
| NMR Spectra                                                                      | S39-S63   |
| HPLC Spectra                                                                     | S64-S93   |
| Quantum chemical calculations                                                    | S94-S102  |
| References                                                                       | S103-S104 |

## General information

<sup>1</sup>H NMR spectra were recorded on Bruker Avance III HD 600 or Avance 400 MHz spectrometer. Chemical shifts are recorded in ppm relative to tetramethylsilane and with the solvent resonance as the internal standard. Data are reported as follows: chemical shift, multiplicity (s = singlet, d = doublet; t = triplet; q = quartet; sept = septet; m = multiplet; br = broad), coupling constants (Hz), integration. <sup>13</sup>C NMR data were collected on Bruker Avance III HD 150 or Avance 100 MHz spectrometer. Chemical shifts are reported in ppm from the tetramethylsilane with the solvent resonance as internal standard. Enantiomer excesses were determined by chiral HPLC analysis on Chiralcel IE/ID/IG in comparison with the authentic racemates. Chiral HPLC analysis recorded on Thermo scientific Dionex Ultimate 3000 and Agilent Technologies 1260 Infinity. Optical rotations were reported as follows:  $[\alpha]_D^{25}$  (c: g/100 mL, in solvent). Optical rotations recorded on Autopol Automatic Polarimeter. HRMS was recorded on an ABI/Sciex QStar Mass Spectrometer (ESI). EtOAc and DCM were purchased extra dry solvents. Other solvents used for work-up and purification purposes were purchased in technical grade quality and distilled by rotary evaporator before use. Single crystal X-ray crystallography data were obtained on Supernova Atlas S2 CCD detector. These ligands **L1-L10** and **L12** were prepared by previous reported methods.<sup>1-5</sup> The  $\beta,\gamma$ -unsaturated- $\alpha$ -ketoesters **2a-2k** were prepared according to literature precedures.<sup>6</sup> The 2,3-dioxopyrrolidine **5a** were prepared according to literature precedures.<sup>7</sup>

## Synthesis of the chiral ligand L11

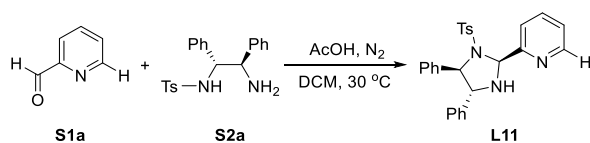

In a round-bottomed flask containing a stir bar, compound **S1a** (475.0  $\mu\text{L}$ , 5.0 mmol), (*R,R*)-TSDPEN **S2a** (1.83 g, 5.0 mmol), AcOH (429.3  $\mu\text{L}$ , 7.5 mmol), and dichloromethane (50.0 mL) were added. Then, the reaction was stirred at 30  $^{\circ}\text{C}$  under  $\text{N}_2$  for 6 h. After that, the reaction mixture was quenched by aqueous  $\text{NaHCO}_3$ . The organic layers were extracted with dichloromethane for 3 times, and the collected organic layers were dried over  $\text{Na}_2\text{SO}_4$ . After removing the solvent under reduced pressure, ligand **L11** could be obtained by recrystallization (recrystallization solvent: Pet/EtOAc) as a white solid.

### 2-((2*S*,4*R*,5*R*)-4,5-Diphenyl-1-tosylimidazolidin-2-yl) pyridine (**L11**)

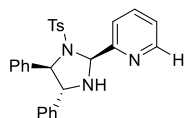

White solid: 1.9 g, 83% yield; m.p.: 131.7-134.4  $^{\circ}\text{C}$ ;  $R_f = 0.6$  (Pet/EtOAc, 5/1, v/v);  $[\alpha]_{\text{D}}^{24} = -22.90$  ( $c = 0.91$ ,  $\text{CHCl}_3$ ).

$^1\text{H NMR}$  (400 MHz,  $\text{CDCl}_3$ )  $\delta$  8.61 (d,  $J = 4.4$  Hz, 1H), 8.05 – 7.98 (m, 1H), 7.85 (td,  $J = 7.6, 1.6$  Hz, 1H), 7.65 – 7.60 (m, 2H), 7.34 – 7.29 (m, 1H), 7.25 – 7.15 (m, 10H), 7.03 – 6.98 (m, 2H), 5.95 (s, 1H), 4.66 (d,  $J = 6.8$  Hz, 1H), 4.33 (d,  $J = 6.8$  Hz, 1H), 3.79 (s, 1H), 2.44 (s, 3H).

$^{13}\text{C NMR}$  (100 MHz,  $\text{CDCl}_3$ )  $\delta$  158.8, 149.2, 143.9, 139.8, 139.2, 137.0, 134.4, 129.7, 128.5, 128.4, 128.1, 127.7, 127.6, 127.4, 127.1, 123.9, 123.5, 78.4, 72.1, 69.9, 21.7.

**HRMS** (ESI): exact mass calcd for  $\text{C}_{27}\text{H}_{25}\text{N}_3\text{NaO}_2\text{S}^+$  ( $\text{M}+\text{Na}$ ) $^+$  requires  $m/z$  478.1560, found  $m/z$  478.1559 ( $\Delta = -1$  ppm).

## General procedures for the preparation of substrates

The substituted 3-chloride oxindoles **1a-1h** were prepared according to literature procedures.<sup>8</sup>

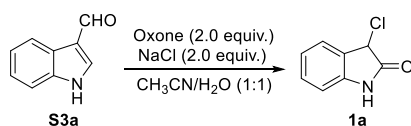

In a 250 mL round bottom flask, 1*H*-indole-3-carbaldehyde **S3a** (3.0 g, 20.0 mmol), Oxone (12.7 g, 40.0 mmol) and NaCl (2.4 g, 40.0 mmol) were dissolved in the solvent of  $\text{CH}_3\text{CN}/\text{H}_2\text{O}$  (1:1). The reaction

mixture was stirred at 50 °C for 3 h as monitored by TLC. After completion of the reaction, the reaction mixture was diluted with ethyl acetate and then the organic layers were dried over Na<sub>2</sub>SO<sub>4</sub> and concentrated under vacuum. The residue was purified by flash column chromatography to give the desired product **1a**.

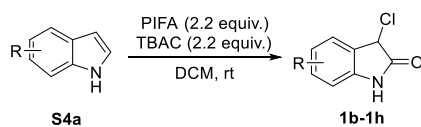

PIFA (12.0 mmol) was added dropwise to a solution of indoles **S4a** (10.0 mmol) and *n*Bu<sub>4</sub>NCl·H<sub>2</sub>O (TBAC) (12.0 mmol) in CH<sub>2</sub>Cl<sub>2</sub> with stirring under open-air conditions at room temperature. The resulting solution was stirred for further 5 minutes. After completion of the reaction, the reaction mixture was diluted with ethyl acetate and then the organic layers were dried over Na<sub>2</sub>SO<sub>4</sub> and concentrated under vacuum. The residue was purified by flash column chromatography to obtain the products **1b-1h**.

## Optimization of the reaction conditions

**Table S1.** Screening of Co(II) salts<sup>a</sup>

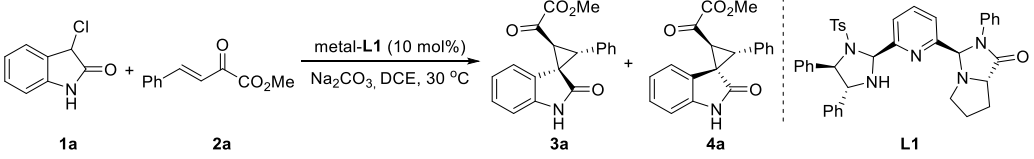

| entry | metal                                                 | yield ( <b>3a</b> ) (%) <sup>b</sup> | <b>3a:4a</b> <sup>c</sup> | ee ( <b>3a</b> ) (%) <sup>d</sup> |
|-------|-------------------------------------------------------|--------------------------------------|---------------------------|-----------------------------------|
| 1     | Co(OAc) <sub>2</sub>                                  | 55                                   | 79:21                     | 64                                |
| 2     | CoBr <sub>2</sub>                                     | 14                                   | 40:60                     | 41                                |
| 3     | Co(acac) <sub>3</sub>                                 | 24                                   | 82:18                     | 24                                |
| 4     | Co(acac) <sub>2</sub>                                 | 41                                   | 90:10                     | 80                                |
| 5     | Co(ClO <sub>4</sub> ) <sub>2</sub> ·6H <sub>2</sub> O | 34                                   | 52:48                     | 83                                |
| 6     | Co(BF <sub>4</sub> ) <sub>2</sub> ·6H <sub>2</sub> O  | 63                                   | 82:18                     | 78                                |

<sup>a</sup>Unless otherwise noted, reactions were carried out with metal (10 mol%), **L1** (10 mol%), **1a** (0.1 mmol), **2a** (0.1 mmol), Na<sub>2</sub>CO<sub>3</sub> (1.1 equiv.) in DCE (2.0 mL) at 30 °C for 12 h. <sup>b</sup>Isolated yield of **3a**. <sup>c</sup>The ratio of **3a:4a** was determined by <sup>1</sup>H NMR spectra of the crude product. <sup>d</sup>The ee of **3a** was determined by chiral HPLC analysis.

**Table S2.** Screening of solvents<sup>a</sup>

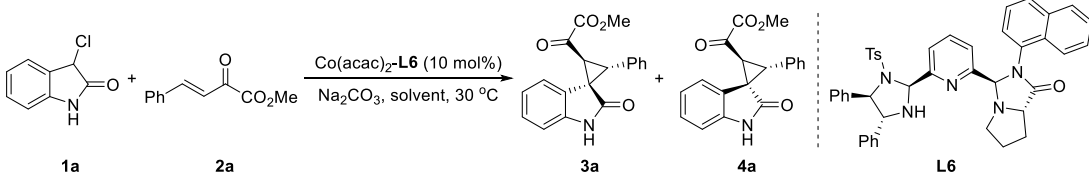

| entry | solvent           | yield ( <b>3a</b> ) (%) <sup>b</sup> | <b>3a:4a</b> <sup>c</sup> | ee ( <b>3a</b> ) (%) <sup>d</sup> |
|-------|-------------------|--------------------------------------|---------------------------|-----------------------------------|
| 1     | DCM               | 88                                   | 92:8                      | 99                                |
| 2     | THF               | 34                                   | 90:10                     | 97                                |
| 3     | MeCN              | 86                                   | 89:11                     | 96                                |
| 4     | PhCF <sub>3</sub> | 96                                   | 93:7                      | 84                                |
| 5     | EtOAc             | 94                                   | >95:5                     | 99                                |
| 6     | TBME              | 96                                   | >95:5                     | 92                                |
| 7     | PhCl              | 86                                   | 94:6                      | 99                                |
| 8     | toluene           | 80                                   | 82:18                     | 89                                |

<sup>a</sup>Unless otherwise noted, reactions were carried out with Co(acac)<sub>2</sub> (10 mol%), **L6** (10 mol%), **1a** (0.1 mmol), **2a** (0.1 mmol), Na<sub>2</sub>CO<sub>3</sub> (1.1 equiv.) in solvent (2.0 mL) at 30 °C for 12 h. <sup>b</sup>Isolated yield of **3a**. <sup>c</sup>The ratio of **3a:4a** was determined by <sup>1</sup>H NMR spectra of the crude product. <sup>d</sup>The ee of **3a** was determined by chiral HPLC analysis.

**Table S3:** Screening of metal/ligand<sup>a</sup>
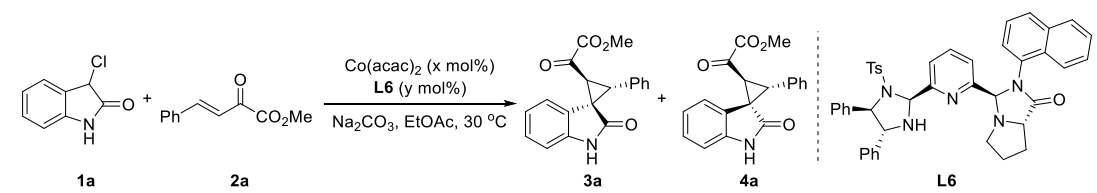

| entry | x  | y  | yield ( <b>3a</b> ) (%) <sup>b</sup> | <b>3a:4a</b> <sup>c</sup> | ee ( <b>3a</b> ) (%) <sup>d</sup> |
|-------|----|----|--------------------------------------|---------------------------|-----------------------------------|
| 1     | 10 | 10 | 95                                   | >95:5                     | 99                                |
| 2     | 10 | 11 | 94                                   | >95:5                     | 99                                |
| 3     | 10 | 12 | 95                                   | >95:5                     | 99                                |

<sup>a</sup>Unless otherwise noted, reactions were carried out with Co(acac)<sub>2</sub> (x mol%), **L6** (y mol%), **1a** (0.1 mmol), **2a** (0.1 mmol), Na<sub>2</sub>CO<sub>3</sub> (1.1 equiv.) in EtOAc (2.0 mL) at 30 °C for 12 h. <sup>b</sup>Isolated yield of **3a**.

<sup>c</sup>The ratio of **3a:4a** was determined by <sup>1</sup>H NMR spectra of the crude product. <sup>d</sup>The ee of **3a** was determined by chiral HPLC analysis.

**Table S4:** Screening the amount of metal and ligand<sup>a</sup>
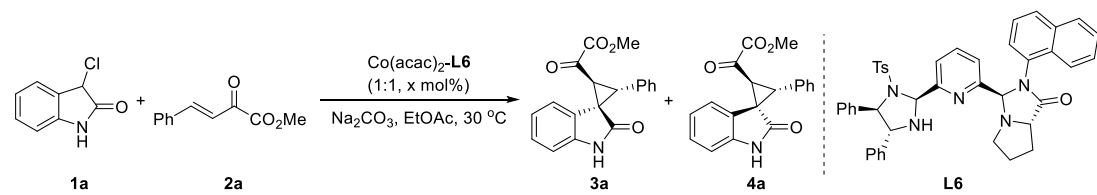

| entry | x    | time (h) | yield ( <b>3a</b> ) (%) <sup>b</sup> | <b>3a:4a</b> <sup>c</sup> | ee ( <b>3a</b> ) (%) <sup>d</sup> |
|-------|------|----------|--------------------------------------|---------------------------|-----------------------------------|
| 1     | 10   | 12       | 95                                   | >95:5                     | 99                                |
| 2     | 5    | 36       | 94                                   | >95:5                     | 99                                |
| 3     | 2.5  | 48       | 95                                   | >95:5                     | 99                                |
| 4     | 1    | 48       | 94                                   | >95:5                     | 97                                |
| 5     | 0.5  | 48       | 87                                   | 92:8                      | 93                                |
| 6     | 0.25 | 48       | 67                                   | 74:26                     | 79                                |
| 7     | 0.1  | 48       | 43                                   | 47:53                     | 28                                |

<sup>a</sup>Unless otherwise noted, reactions were carried out with Co(acac)<sub>2</sub>/**L6** = 1:1 (x mol%), **1a** (0.1 mmol), **2a** (0.1 mmol), Na<sub>2</sub>CO<sub>3</sub> (1.1 equiv.) in EtOAc (2.0 mL) at 30 °C. <sup>b</sup>Isolated yield of **3a**. <sup>c</sup>The ratio of **3a:4a** was determined by <sup>1</sup>H NMR spectra of the crude product. <sup>d</sup>The ee of **3a** was determined by chiral HPLC analysis.

## Catalytic asymmetric Michael–Alkylation reactions

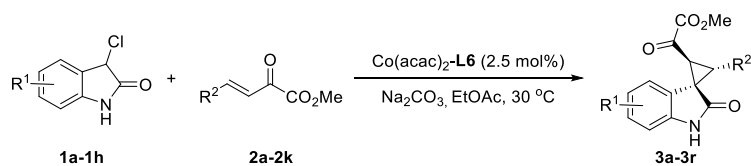

Preparation of  $\text{Co}(\text{acac})_2$  and **L6** solution: in a 2.0 mL volumetric flask,  $\text{Co}(\text{acac})_2$  (6.4 mg, 0.025 mmol) was added, then THF was added to make the total volume up to 2.0 mL. In a 2.0 mL volumetric flask, **L6** (17.6 mg, 0.025 mmol) was added, then THF was added to make the total volume up to 2.0 mL.

In a dry reaction tube, 200  $\mu\text{L}$  (2.5 mol%) of  $\text{Co}(\text{acac})_2$  solution and 200  $\mu\text{L}$  (2.5 mol%) of **L6** were added. Then, THF was removed under vacuum. After that,  $\beta,\gamma$ -unsaturated- $\alpha$ -ketoesters **2** (19.0 mg, 0.1 mmol) and EtOAc (2.0 mL) were added and the reaction was stirred at 30 °C for 0.5 h. Subsequently, 3-chlorooxindoles **1** (16.7 mg, 0.1 mmol) and  $\text{Na}_2\text{CO}_3$  (11.7 mg, 0.11 mmol) were added and the reaction was stirred at 30 °C until **1** was consumed (detected by TLC, Pet/EtOAc, 1/1, v/v). Finally, the corresponding product **3** was purified directly by flask column chromatography (Pet/EtOAc, 5/1-1/1, v/v).

### Methyl 2-oxo-2-((1*R*,2*S*,3*R*)-2'-oxo-2-phenylspiro[cyclopropane-1,3'-indolin]-3-yl) acetate (**3a**)

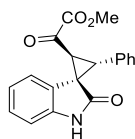

Colorless solid, 30.5 mg, 95% yield, 97:3 dr, 99% ee;  $R_f = 0.4$  (Pet/EtOAc, 1/1, v/v);  $[\alpha]_D^{24} = +100.00$  ( $c = 0.77$ ,  $\text{CH}_2\text{Cl}_2$ ); reaction time: 48 h; reaction temperature: 30 °C.

**HPLC** CHIRALPAK IE, n-hexane/2-propanol = 80/20, flow rate 1.0 mL/min,  $\lambda = 254$  nm, retention time: 14.418 min (major), 16.940 min (minor).

**$^1\text{H}$  NMR** (400 MHz,  $\text{DMSO-d}_6$ )  $\delta$  10.70 (s, 1H), 7.36 – 7.28 (m, 5H), 7.10 (td,  $J = 5.2, 0.8$  Hz, 1H), 6.87 (d,  $J = 5.2$  Hz, 1H), 6.66 (td,  $J = 5.2, 0.8$  Hz, 1H), 6.10 (d,  $J = 5.2$  Hz, 1H), 3.91 (d,  $J = 5.6$  Hz, 1H), 3.72 (s, 3H), 3.59 (d,  $J = 5.6$  Hz, 1H).

**$^{13}\text{C}$  NMR** (100 MHz,  $\text{DMSO-d}_6$ )  $\delta$  186.5, 174.0, 159.9, 142.5, 133.1, 130.0, 128.4, 127.7, 127.6, 125.7, 121.0, 120.8, 109.7, 52.7, 40.1, 38.6, 36.8.

**HRMS** (ESI): exact mass calcd for  $\text{C}_{19}\text{H}_{15}\text{NNaO}_4^+$  ( $\text{M}+\text{Na}$ ) $^+$  requires  $m/z$  344.0893, found  $m/z$  344.0892 ( $\Delta = -1$  ppm). Known compound.<sup>9</sup>

**Methyl 2-oxo-2-((1*S*,2*R*,3*S*)-2'-oxo-2-phenylspiro[cyclopropane-1,3'-indolin]-3-yl)acetate (*ent*-3a)**

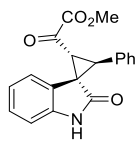

Colorless solid, 29.9 mg, 93% yield, 98:2 dr, 98% ee;  $R_f = 0.4$  (Pet/EtOAc, 1/1, v/v);  $[\alpha]_D^{23} = +114.99$  ( $c = 1.25$ ,  $\text{CH}_2\text{Cl}_2$ ); reaction time: 48 h; reaction temperature: 30 °C.

**HPLC** CHIRALPAK IE, n-hexane/2-propanol = 80/20, flow rate 1.0 mL/min,  $\lambda = 254$  nm, retention time: 14.562 min (minor), 16.398 min (major).

**Methyl 2-((1*R*,2*S*,3*R*)-5'-chloro-2'-oxo-2-phenylspiro[cyclopropane-1,3'-indolin]-3-yl)-2-oxoacetate (3b)**

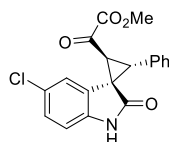

Light yellow solid, 30.2 mg, 85% yield, >99:1 dr, 97% ee; m.p.: 126.6-129.3 °C;  $R_f = 0.45$  (Pet/EtOAc, 1/1, v/v);  $[\alpha]_D^{24} = +66.03$  ( $c = 1.26$ ,  $\text{CH}_2\text{Cl}_2$ ); reaction time: 60 h; reaction temperature: 30 °C.

**HPLC** CHIRALPAK IE, n-hexane/2-propanol = 80/20, flow rate 1.0 mL/min,  $\lambda = 254$  nm, retention time: 10.542 min (major), 12.155 min (minor).

**$^1\text{H NMR}$**  (400 MHz,  $\text{DMSO-d}_6$ )  $\delta$  10.87 (s, 1H), 7.41 – 7.27 (m, 5H), 7.16 (dd,  $J = 8.0, 2.0$  Hz, 1H), 6.88 (d,  $J = 8.0$  Hz, 1H), 6.09 (d,  $J = 2.0$  Hz, 1H), 4.04 (d,  $J = 8.4$  Hz, 1H), 3.72 (s, 3H), 3.63 (d,  $J = 8.4$  Hz, 1H).

**$^{13}\text{C NMR}$**  (100 MHz,  $\text{DMSO-d}_6$ )  $\delta$  186.3, 173.8, 159.8, 141.4, 132.6, 129.6, 128.5, 128.0, 127.8, 127.4, 124.9, 121.1, 111.0, 52.8, 40.0, 38.7, 37.3.

**HRMS** (ESI): exact mass calcd for  $\text{C}_{19}\text{H}_{14}\text{ClNNaO}_4^+$  ( $\text{M}+\text{Na}$ ) $^+$  requires  $m/z$  378.0504, found  $m/z$  378.0511 ( $\Delta = +7$  ppm).

**Methyl 2-((1*S*,2*R*,3*S*)-5'-chloro-2'-oxo-2-phenylspiro[cyclopropane-1,3'-indolin]-3-yl)-2-oxoacetate (*ent*-3b)**

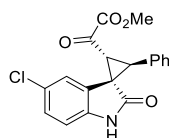



Light yellow solid, 34.4 mg, 97% yield, >99:1 dr, 95% ee;  $R_f = 0.45$  (Pet/EtOAc, 1/1, v/v);  $[\alpha]_D^{23} = +60.68$  ( $c = 1.90$ ,  $\text{CH}_2\text{Cl}_2$ ); reaction time: 60 h; reaction temperature: 30 °C.

**HPLC** CHIRALPAK IE, n-hexane/2-propanol = 80/20, flow rate 1.0 mL/min,  $\lambda = 254$  nm, retention time: 10.718 min (minor), 12.053 min (major).

**Methyl 2-((1*R*,2*S*,3*R*)-5'-bromo-2'-oxo-2-phenylspiro[cyclopropane-1,3'-indolin]-3-yl)-2-oxoacetate (3c)**

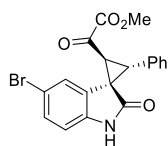

Light yellow oil, 35.9 mg, 90% yield, >99:1 dr, 97% ee;  $R_f = 0.45$  (Pet/EtOAc, 1/1, v/v);  $[\alpha]_D^{24} = +54.07$  ( $c = 1.49$ ,  $\text{CH}_2\text{Cl}_2$ ); reaction time: 72 h; reaction temperature: 30 °C.

**HPLC** CHIRALPAK IG, n-hexane/2-propanol = 80/20, flow rate 1.0 mL/min,  $\lambda = 254$  nm, retention time: 10.233 min (major), 11.855 min (minor).

**<sup>1</sup>H NMR** (400 MHz,  $\text{DMSO-d}_6$ )  $\delta$  10.87 (s, 1H), 7.39 – 7.27 (m, 6H), 6.84 (d,  $J = 8.0$  Hz, 1H), 6.20 (d,  $J = 2.0$  Hz, 1H), 4.03 (d,  $J = 8.4$  Hz, 1H), 3.72 (s, 3H), 3.62 (d,  $J = 8.4$  Hz, 1H).

**<sup>13</sup>C NMR** (100 MHz,  $\text{DMSO-d}_6$ )  $\delta$  186.3, 173.7, 159.8, 141.8, 132.6, 130.2, 129.6, 128.5, 128.2, 128.0, 123.8, 112.6, 111.5, 52.8, 39.9, 38.8, 37.3.

**HRMS** (ESI): exact mass calcd for  $\text{C}_{19}\text{H}_{14}\text{BrNNaO}_4^+$  ( $\text{M}+\text{Na}$ )<sup>+</sup> requires  $m/z$  421.9998, found  $m/z$  421.9995 ( $\Delta = -3$  ppm).

**Methyl 2-((1*R*,2*S*,3*R*)-6'-bromo-2'-oxo-2-phenylspiro[cyclopropane-1,3'-indolin]-3-yl)-2-oxoacetate (3d)**

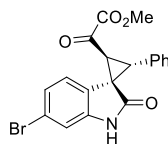

Yellow solid, 37.9 mg, 95% yield, 99:1 dr, 96% ee;  $R_f = 0.35$  (Pet/EtOAc, 1/1, v/v);  $[\alpha]_D^{24} = +91.55$  ( $c = 1.22$ ,  $\text{CH}_2\text{Cl}_2$ ); reaction time: 72 h; reaction temperature: 30 °C.

**HPLC** CHIRALPAK IE, n-hexane/2-propanol = 80/20, flow rate 1.0 mL/min,  $\lambda = 254$  nm, retention time: 12.550 min (major), 14.337 min (minor).

**<sup>1</sup>H NMR** (400 MHz, DMSO-*d*<sup>6</sup>) δ 10.90 (s, 1H), 7.31 (s, 5H), 7.03 (s, 1H), 6.85 (d, *J* = 7.6 Hz, 1H), 6.01 (d, *J* = 7.6 Hz, 1H), 3.98 (d, *J* = 8.4 Hz, 1H), 3.72 (s, 3H), 3.63 (d, *J* = 8.4 Hz, 1H).

**<sup>13</sup>C NMR** (100 MHz, DMSO-*d*<sup>6</sup>) δ 186.1, 173.9, 159.8, 144.0, 132.8, 129.5, 128.5, 127.9, 125.1, 123.5, 122.6, 120.3, 112.5, 52.8, 39.8, 38.7, 37.1.

**HRMS** (ESI): exact mass calcd for C<sub>19</sub>H<sub>14</sub>BrNNaO<sub>4</sub><sup>+</sup> (M+Na)<sup>+</sup> requires *m/z* 421.9998, found *m/z* 421.9989 (Δ = -9 ppm). Known compound.<sup>9</sup>

**Methyl 2-((1*S*,2*R*,3*S*)-6'-bromo-2'-oxo-2-phenylspiro[cyclopropane-1,3'-indolin]-3-yl)-2-oxoacetate (*ent*-3d)**

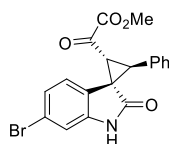

Yellow solid, 38.3 mg, 96% yield, 98:2 dr, 95% ee; *R*<sub>f</sub> = 0.35 (Pet/EtOAc, 1/1, v/v); [α]<sub>D</sub><sup>23</sup> = +81.10 (c = 2.27, CH<sub>2</sub>Cl<sub>2</sub>); reaction time: 72 h; reaction temperature: 30 °C.

**HPLC** CHIRALPAK IE, n-hexane/2-propanol = 80/20, flow rate 1.0 mL/min, λ = 254 nm, retention time: 12.872 min (minor), 14.223 min (major).

**Methyl 2-((1*R*,2*S*,3*R*)-4'-methyl-2'-oxo-2-phenylspiro[cyclopropane-1,3'-indolin]-3-yl)-2-oxoacetate (3e)**

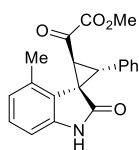

Colorless solid, 28.1 mg, 84% yield, 89:11 dr, 97% ee; *R*<sub>f</sub> = 0.5 (Pet/EtOAc, 1/1, v/v); [α]<sub>D</sub><sup>23</sup> = +57.23 (c = 1.74, CH<sub>2</sub>Cl<sub>2</sub>); reaction time: 72 h; reaction temperature: 30 °C.

**HPLC** CHIRALPAK IE, n-hexane/2-propanol = 80/20, flow rate 1.0 mL/min, λ = 254 nm, retention time: 13.680 min (major), 16.305 min (minor).

**<sup>1</sup>H NMR** (400 MHz, DMSO-*d*<sup>6</sup>) δ 10.76 (s, 1H), 7.37 – 7.23 (m, 3H), 7.23 – 7.12 (m, 2H), 7.05 (t, *J* = 7.6 Hz, 1H), 6.78 (d, *J* = 7.6 Hz, 1H), 6.53 (d, *J* = 7.6 Hz, 1H), 4.15 (d, *J* = 8.8 Hz, 1H), 3.72 (s, 3H), 3.38 (d, *J* = 8.4 Hz, 1H), 1.21 (s, 3H).

**<sup>13</sup>C NMR** (100 MHz, DMSO-*d*<sup>6</sup>) δ 187.8, 174.8, 159.9, 143.3, 135.4, 133.7, 129.6, 128.6, 127.8, 127.5,

124.4, 122.4, 107.9, 52.7, 40.7, 37.8, 35.5, 18.1.

**HRMS** (ESI): exact mass calcd for  $C_{20}H_{17}NNaO_4^+$  ( $M+Na$ )<sup>+</sup> requires  $m/z$  358.1050, found  $m/z$  358.1047 ( $\Delta = -3$  ppm). Known compound.<sup>9</sup>

**Methyl 2-((1*R*,2*S*,3*R*)-5'-methyl-2'-oxo-2-phenylspiro[cyclopropane-1,3'-indolin]-3-yl)-2-oxoacetate (3f)**

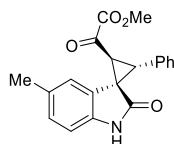

Light yellow oil, 31.8 mg, 95% yield, 97:3 dr, 99% ee;  $R_f = 0.5$  (Pet/EtOAc, 1/1, v/v);  $[\alpha]_D^{23} = +74.04$  ( $c = 2.42$ ,  $CH_2Cl_2$ ); reaction time: 48 h; reaction temperature: 30 °C.

**HPLC** CHIRALPAK IE, n-hexane/2-propanol = 80/20, flow rate 1.0 mL/min,  $\lambda = 254$  nm, retention time: 14.418 min (major), 17.948 min (minor).

**<sup>1</sup>H NMR** (400 MHz, DMSO- $d_6$ )  $\delta$  10.60 (s, 1H), 7.38 – 7.26 (m, 5H), 6.91 (d,  $J = 8.0$  Hz, 1H), 6.75 (d,  $J = 8.0$  Hz, 1H), 5.91 (s, 1H), 3.86 (d,  $J = 8.4$  Hz, 1H), 3.71 (s, 3H), 3.57 (d,  $J = 8.4$  Hz, 1H), 1.96 (s, 3H).

**<sup>13</sup>C NMR** (100 MHz, DMSO- $d_6$ )  $\delta$  186.5, 174.0, 159.9, 140.0, 133.1, 129.54, 129.47, 128.4, 127.8, 127.7, 125.8, 121.8, 109.3, 52.7, 40.2, 38.6, 36.7, 20.7.

**HRMS** (ESI): exact mass calcd for  $C_{20}H_{17}NNaO_4^+$  ( $M+Na$ )<sup>+</sup> requires  $m/z$  358.1050, found  $m/z$  358.1045 ( $\Delta = -5$  ppm). Known compound.<sup>9</sup>

**Methyl 2-((1*R*,2*S*,3*R*)-5'-methoxy-2'-oxo-2-phenylspiro[cyclopropane-1,3'-indolin]-3-yl)-2-oxoacetate (3g)**

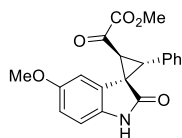

Light yellow solid, 33.7 mg, 96% yield, 96:4 dr, 99% ee; m.p.: 57.4-60.0 °C;  $R_f = 0.5$  (Pet/EtOAc, 1/1, v/v);  $[\alpha]_D^{24} = +93.56$  ( $c = 1.03$ ,  $CH_2Cl_2$ ); reaction time: 36 h; reaction temperature: 30 °C.

**HPLC** CHIRALPAK IE, n-hexane/2-propanol = 80/20, flow rate 1.0 mL/min,  $\lambda = 254$  nm, retention time: 19.437 min (major), 24.952 min (minor).

**<sup>1</sup>H NMR** (400 MHz, DMSO-*d*<sup>6</sup>) δ 10.53 (s, 1H), 7.45 – 7.23 (m, 5H), 6.77 (d, *J* = 8.4 Hz, 1H), 6.67 (dd, *J* = 8.4, 2.8 Hz, 1H), 5.70 (d, *J* = 2.4 Hz, 1H), 3.91 (d, *J* = 8.4 Hz, 1H), 3.72 (s, 3H), 3.60 (d, *J* = 8.4 Hz, 1H), 3.41 (s, 3H).

**<sup>13</sup>C NMR** (100 MHz, DMSO-*d*<sup>6</sup>) δ 186.5, 173.9, 159.9, 154.0, 135.8, 133.0, 129.6, 128.4, 127.7, 126.9, 112.2, 109.9, 108.1, 55.0, 52.7, 40.4, 38.5, 36.8.

**HRMS** (ESI): exact mass calcd for C<sub>20</sub>H<sub>17</sub>NNaO<sub>5</sub><sup>+</sup> (M+Na)<sup>+</sup> requires *m/z* 374.0999, found *m/z* 374.0998 (Δ = -1 ppm).

**Methyl 2-((1*S*,2*R*,3*S*)-5'-methoxy-2'-oxo-2-phenylspiro[cyclopropane-1,3'-indolin]-3-yl)-2-oxoacetate (*ent*-3g)**

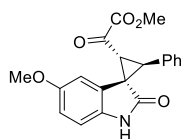

Light yellow solid, 30.9 mg, 88% yield, 97:3 dr, 98% ee; *R*<sub>f</sub> = 0.5 (Pet/EtOAc, 1/1, v/v); [α]<sub>D</sub><sup>23</sup> = +78.70 (c = 1.62, CH<sub>2</sub>Cl<sub>2</sub>); reaction time: 36 h; reaction temperature: 30 °C.

**HPLC** CHIRALPAK IE, n-hexane/2-propanol = 80/20, flow rate 1.0 mL/min, λ = 254 nm, retention time: 19.788 min (minor), 24.232 min (major).

**Methyl 2-((1*R*,2*S*,3*R*)-7'-methyl-2'-oxo-2-phenylspiro[cyclopropane-1,3'-indolin]-3-yl)-2-oxoacetate (3h)**

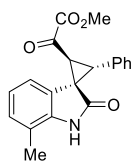

Colorless solid, 32.8 mg, 98% yield, >99:1 dr, 99% ee; m.p.: 69.4-72.0 °C; *R*<sub>f</sub> = 0.55 (Pet/EtOAc, 1/1, v/v); [α]<sub>D</sub><sup>23</sup> = +90.67 (c = 2.15, CH<sub>2</sub>Cl<sub>2</sub>); reaction time: 36 h; reaction temperature: 30 °C.

**HPLC** CHIRALPAK ID, n-hexane/2-propanol = 80/20, flow rate 1.0 mL/min, λ = 254 nm, retention time: 10.772 min (major), 14.203 min (minor).

**<sup>1</sup>H NMR** (400 MHz, DMSO-*d*<sup>6</sup>) δ 10.75 (s, 1H), 7.38 – 7.23 (m, 5H), 6.92 (d, *J* = 7.6 Hz, 1H), 6.57 (t, *J* = 7.6 Hz, 1H), 5.93 (d, *J* = 7.2 Hz, 1H), 3.89 (d, *J* = 8.4 Hz, 1H), 3.72 (s, 3H), 3.58 (d, *J* = 8.4 Hz, 1H), 2.21 (s, 3H).

$^{13}\text{C}$  NMR (100 MHz, DMSO- $d_6$ )  $\delta$  = 186.5, 174.5, 159.9, 141.0, 133.1, 129.6, 128.9, 128.4, 127.7, 125.3, 120.8, 119.0, 118.3, 52.7, 40.4, 38.6, 36.9, 16.3.

**HRMS** (ESI): exact mass calcd for  $\text{C}_{20}\text{H}_{17}\text{NNaO}_4^+$  ( $\text{M}+\text{Na}$ ) $^+$  requires  $m/z$  358.1050, found  $m/z$  358.1044 ( $\Delta$  = -6 ppm).

**Methyl 2-((1*S*,2*R*,3*S*)-7'-methyl-2'-oxo-2-phenylspiro[cyclopropane-1,3'-indolin]-3-yl)-2-oxoacetate (*ent*-3h)**

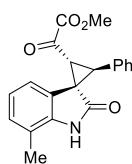

Colorless solid, 32.2 mg, 96% yield, >99:1 dr, 97% ee;  $R_f$  = 0.55 (Pet/EtOAc, 1/1, v/v);  $[\alpha]_D^{23}$  = +134.12 ( $c$  = 1.32,  $\text{CH}_2\text{Cl}_2$ ); reaction time: 36 h; reaction temperature: 30 °C.

**HPLC** CHIRALPAK ID, n-hexane/2-propanol = 80/20, flow rate 1.0 mL/min,  $\lambda$  = 254 nm, retention time: 10.985 min (minor), 13.860 min (major).

**Methyl 2-((1*R*,2*S*,3*R*)-2-(4-chlorophenyl)-2'-oxospiro[cyclopropane-1,3'-indolin]-3-yl)-2-oxoacetate (3i)**

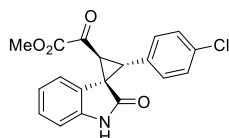

Yellow oil, 34.4 mg, 97% yield, 98:2 dr, 99% ee;  $R_f$  = 0.4 (Pet/EtOAc, 1/1, v/v);  $[\alpha]_D^{24}$  = +106.76 ( $c$  = 1.73,  $\text{CH}_2\text{Cl}_2$ ); reaction time: 48 h; reaction temperature: 30 °C.

**HPLC** CHIRALPAK IE, n-hexane/2-propanol = 80/20, flow rate 1.0 mL/min,  $\lambda$  = 254 nm, retention time: 12.380 min (major), 14.317 min (minor).

$^1\text{H}$  NMR (400 MHz, DMSO- $d_6$ )  $\delta$  10.73 (s, 1H), 7.43 – 7.30 (m, 4H), 7.12 (td,  $J$  = 7.6, 1.2 Hz, 1H), 6.89 (d,  $J$  = 7.6 Hz, 1H), 6.70 (td,  $J$  = 7.6, 1.2 Hz, 1H), 6.14 (dd,  $J$  = 7.6, 1.2 Hz, 1H), 3.92 (d,  $J$  = 8.4 Hz, 1H), 3.72 (s, 3H), 3.58 (d,  $J$  = 8.4 Hz, 1H).

$^{13}\text{C}$  NMR (100 MHz, DMSO- $d_6$ )  $\delta$  186.2, 173.9, 159.9, 142.5, 132.4, 132.2, 131.5, 128.5, 127.7, 125.4, 121.0, 109.8, 52.8, 38.6, 36.1.

**HRMS** (ESI): exact mass calcd for  $\text{C}_{19}\text{H}_{14}\text{ClNNaO}_4^+$  ( $\text{M}+\text{Na}$ ) $^+$  requires  $m/z$  378.0504, found  $m/z$

378.0508 ( $\Delta = +4$  ppm). Known compound.<sup>9</sup>

**Methyl 2-((1*S*,2*R*,3*S*)-2-(4-chlorophenyl)-2'-oxospiro[cyclopropane-1,3'-indolin]-3-yl)-2-oxoacetate (*ent*-3i)**

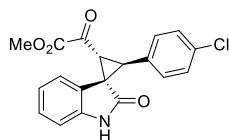

Yellow oil, 30.5 mg, 86% yield, 98:2 dr, 99% ee;  $R_f = 0.4$  (Pet/EtOAc, 1/1, v/v);  $[\alpha]_D^{23} = +90.87$  ( $c = 1.34$ ,  $\text{CH}_2\text{Cl}_2$ ); reaction time: 48 h; reaction temperature: 30 °C.

**HPLC** CHIRALPAK IE, n-hexane/2-propanol = 80/20, flow rate 1.0 mL/min,  $\lambda = 254$  nm, retention time: 12.462 min (minor), 14.080 min (major).

**Methyl 2-((1*R*,2*S*,3*R*)-2-(4-bromophenyl)-2'-oxospiro[cyclopropane-1,3'-indolin]-3-yl)-2-oxoacetate (3j)**

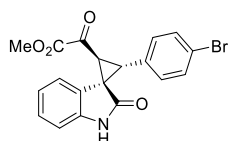

Light yellow solid, 37.9 mg, 95% yield, 98:2 dr, 98% ee;  $R_f = 0.4$  (Pet/EtOAc, 1/1, v/v);  $[\alpha]_D^{23} = +84.41$  ( $c = 2.12$ ,  $\text{CH}_2\text{Cl}_2$ ); reaction time: 60 h; reaction temperature: 30 °C.

**HPLC** CHIRALPAK IE, n-hexane/2-propanol = 80/20, flow rate 1.0 mL/min,  $\lambda = 254$  nm, retention time: 12.910 min (major), 14.915 min (minor).

**<sup>1</sup>H NMR** (400 MHz,  $\text{DMSO-d}_6$ )  $\delta$  10.72 (s, 1H), 7.53 (d,  $J = 8.0$  Hz, 2H), 7.27 (d,  $J = 8.0$  Hz, 2H), 7.13 (t,  $J = 7.6$  Hz, 1H), 6.88 (d,  $J = 8.0$  Hz, 1H), 6.71 (t,  $J = 7.6$  Hz, 1H), 6.14 (d,  $J = 7.2$  Hz, 1H), 3.91 (d,  $J = 8.4$  Hz, 1H), 3.72 (s, 3H), 3.55 (d,  $J = 8.4$  Hz, 1H).

**<sup>13</sup>C NMR** (100 MHz,  $\text{DMSO-d}_6$ )  $\delta$  186.2, 173.8, 159.9, 142.5, 132.6, 131.8, 131.4, 127.7, 125.4, 121.00, 120.96, 109.8, 52.8, 40.1, 38.5, 36.1.

**HRMS** (ESI): exact mass calcd for  $\text{C}_{19}\text{H}_{14}\text{BrNNaO}_4^+$  ( $\text{M}+\text{Na}$ )<sup>+</sup> requires  $m/z$  421.9998, found  $m/z$  421.9996 ( $\Delta = -2$  ppm). Known compound.<sup>9</sup>

**Methyl 2-((1*S*,2*R*,3*S*)-2-(4-bromophenyl)-2'-oxospiro[cyclopropane-1,3'-indolin]-3-yl)-2-oxoacetate (*ent*-3j)**

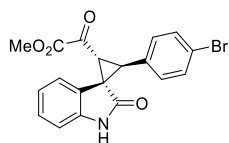

Light yellow solid, 36.3 mg, 91% yield, 98:2 dr, 98% ee;  $R_f = 0.4$  (Pet/EtOAc, 1/1, v/v);  $[\alpha]_D^{23} = +73.68$  ( $c = 1.63$ ,  $\text{CH}_2\text{Cl}_2$ ); reaction time: 60 h; reaction temperature: 30 °C.

**HPLC** CHIRALPAK IE, n-hexane/2-propanol = 80/20, flow rate 1.0 mL/min,  $\lambda = 254$  nm, retention time: 12.918 min (minor), 14.455 min (major).

**Methyl 2-((1*R*,2*S*,3*R*)-2-(3-chlorophenyl)-2'-oxospiro[cyclopropane-1,3'-indolin]-3-yl)-2-oxoacetate (3k)**

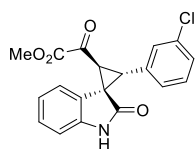

Yellow oil, 27.3 mg, 77% yield, >99:1 dr, 98% ee;  $R_f = 0.35$  (Pet/EtOAc, 1/1, v/v);  $[\alpha]_D^{23} = +191.27$  ( $c = 1.25$ ,  $\text{CH}_2\text{Cl}_2$ ); reaction time: 48 h; reaction temperature: 30 °C.

**HPLC** CHIRALPAK ID, n-hexane/2-propanol = 80/20, flow rate 1.0 mL/min,  $\lambda = 254$  nm, retention time: 9.312 min (major), 11.497 min (minor).

**$^1\text{H NMR}$**  (400 MHz,  $\text{DMSO-d}_6$ )  $\delta$  10.74 (s, 1H), 7.45 (s, 1H), 7.40 – 7.22 (m, 3H), 7.13 (t,  $J = 7.6$  Hz, 1H), 6.89 (d,  $J = 7.6$  Hz, 1H), 6.70 (t,  $J = 7.6$  Hz, 1H), 6.13 (d,  $J = 7.2$  Hz, 1H), 3.96 (d,  $J = 8.0$  Hz, 1H), 3.72 (s, 3H), 3.61 (d,  $J = 8.4$  Hz, 1H).

**$^{13}\text{C NMR}$**  (100 MHz,  $\text{DMSO-d}_6$ )  $\delta$  186.1, 173.7, 159.9, 142.5, 135.7, 133.1, 130.2, 129.4, 128.3, 127.8, 125.4, 120.94, 120.91, 109.8, 52.8, 38.5, 36.0.

**HRMS** (ESI): exact mass calcd for  $\text{C}_{19}\text{H}_{14}\text{ClNNaO}_4^+$  ( $\text{M}+\text{Na}$ ) $^+$  requires  $m/z$  378.0504, found  $m/z$  378.0508 ( $\Delta = +4$  ppm). Known compound.<sup>9</sup>

**Methyl 2-((1*S*,2*R*,3*S*)-2-(3-chlorophenyl)-2'-oxospiro[cyclopropane-1,3'-indolin]-3-yl)-2-oxoacetate (*ent*-3k)**

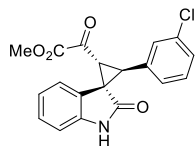

Yellow oil, 26.6 mg, 77% yield, 98:2 dr, 97% ee;  $R_f = 0.35$  (Pet/EtOAc, 1/1, v/v);  $[\alpha]_D^{23} = +98.59$  ( $c = 1.84$ ,  $\text{CH}_2\text{Cl}_2$ ); reaction time: 48 h; reaction temperature: 30 °C.

**HPLC** CHIRALPAK ID, n-hexane/2-propanol = 80/20, flow rate 1.0 mL/min,  $\lambda = 254$  nm, retention time: 9.290 min (minor), 11.132 min (major).

**Methyl 2-((1*R*,2*S*,3*R*)-2-(2-bromophenyl)-2'-oxospiro[cyclopropane-1,3'-indolin]-3-yl)-2-oxoacetate (3l)**

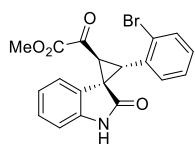

White solid, 23.5 mg, 59% yield, 97:3 dr, 98% ee;  $R_f = 0.35$  (Pet/EtOAc, 1/1, v/v); m.p.: 132.7-135.1 °C;  $[\alpha]_D^{23} = +46.46$  ( $c = 0.96$ ,  $\text{CH}_2\text{Cl}_2$ ); reaction time: 60 h; reaction temperature: 30 °C.

**HPLC** CHIRALPAK IE, n-hexane/2-propanol = 80/20, flow rate 1.0 mL/min,  $\lambda = 254$  nm, retention time: 18.197 min (major), 27.780 min (minor).

**<sup>1</sup>H NMR** (400 MHz,  $\text{DMSO-d}_6$ )  $\delta$  10.70 (s, 1H), 7.65 (d,  $J = 7.6$  Hz, 1H), 7.56 – 7.44 (m, 2H), 7.28 (td,  $J = 7.6, 1.6$  Hz, 1H), 7.11 (td,  $J = 7.6, 1.2$  Hz, 1H), 6.86 (d,  $J = 7.6$  Hz, 1H), 6.62 (td,  $J = 7.6, 1.2$  Hz, 1H), 5.93 (d,  $J = 7.2$  Hz, 1H), 3.98 (d,  $J = 8.4$  Hz, 1H), 3.73 (s, 3H), 3.44 (d,  $J = 8.4$  Hz, 1H).

**<sup>13</sup>C NMR** (100 MHz,  $\text{DMSO-d}_6$ )  $\delta$  185.9, 173.7, 159.8, 142.5, 133.2, 132.3, 130.7, 130.0, 127.8, 127.7, 126.2, 125.3, 120.8, 119.9, 109.6, 52.8, 38.0.

**HRMS** (ESI): exact mass calcd for  $\text{C}_{19}\text{H}_{14}\text{BrNNaO}_4^+$  ( $\text{M}+\text{Na}$ )<sup>+</sup> requires  $m/z$  421.9998, found  $m/z$  421.9991 ( $\Delta = -7$  ppm).

**Methyl 2-oxo-2-((1*R*,2*S*,3*R*)-2'-oxo-2-(p-tolyl)spiro[cyclopropane-1,3'-indolin]-3-yl)acetate (3m)**

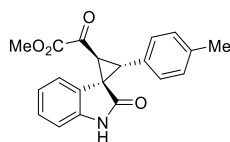



Yellow solid, 31.8 mg, 95% yield, 98:2 dr, 99% ee;  $R_f = 0.45$  (Pet/EtOAc, 1/1, v/v);  $[\alpha]_D^{23} = +87.53$  ( $c = 0.97$ ,  $\text{CH}_2\text{Cl}_2$ ); reaction time: 36 h; reaction temperature: 30 °C.

**HPLC** CHIRALPAK IE, n-hexane/2-propanol = 80/20, flow rate 1.0 mL/min,  $\lambda = 254$  nm, retention time: 14.913 min (major), 18.173 min (minor).

**$^1\text{H NMR}$**  (400 MHz,  $\text{DMSO-d}_6$ )  $\delta$  10.68 (s, 1H), 7.16 (dd,  $J = 16.0, 5.2$  Hz, 4H), 7.10 (t,  $J = 5.2$  Hz, 1H), 6.87 (d,  $J = 5.2$  Hz, 1H), 6.68 (t,  $J = 5.2$  Hz, 1H), 6.14 (d,  $J = 5.2$  Hz, 1H), 3.88 (d,  $J = 5.6$  Hz, 1H), 3.71 (s, 3H), 3.53 (d,  $J = 5.6$  Hz, 1H), 2.28 (s, 3H).

**$^{13}\text{C NMR}$**  (100 MHz,  $\text{DMSO-d}_6$ )  $\delta$  186.5, 174.0, 159.9, 142.4, 136.9, 130.0, 129.4, 129.0, 127.5, 125.7, 121.0, 120.9, 109.6, 52.7, 40.2, 38.7, 36.7, 20.7.

**HRMS** (ESI): exact mass calcd for  $\text{C}_{20}\text{H}_{17}\text{NNaO}_4^+$  ( $\text{M}+\text{Na}$ ) $^+$  requires  $m/z$  358.1050, found  $m/z$  358.1056 ( $\Delta = +6$  ppm). Known compound.<sup>9</sup>

**Methyl 2-oxo-2-((1*S*,2*R*,3*S*)-2'-oxo-2-(*p*-tolyl)spiro[cyclopropane-1,3'-indolin]-3-yl)acetate (*ent*-3m)**

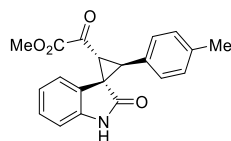

Yellow solid, 32.2 mg, 96% yield, 98:2 dr, 99% ee;  $R_f = 0.45$  (Pet/EtOAc, 1/1, v/v);  $[\alpha]_D^{23} = +100.90$  ( $c = 1.37$ ,  $\text{CH}_2\text{Cl}_2$ ); reaction time: 36 h; reaction temperature: 30 °C.

**HPLC** CHIRALPAK IE, n-hexane/2-propanol = 80/20, flow rate 1.0 mL/min,  $\lambda = 254$  nm, retention time: 15.093 min (minor), 17.580 min (major).

**Methyl 2-((1*R*,2*S*,3*R*)-2-(4-methoxyphenyl)-2'-oxospiro[cyclopropane-1,3'-indolin]-3-yl)-2-oxoacetate (3n)**

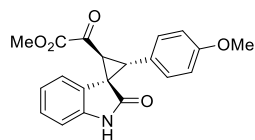

Colorless oil, 34.0 mg, 97% yield, 97:3 dr, 96% ee;  $R_f = 0.45$  (Pet/EtOAc, 1/1, v/v);  $[\alpha]_D^{24} = +119.46$  ( $c = 0.86$ ,  $\text{CH}_2\text{Cl}_2$ ); reaction time: 36 h; reaction temperature: 30 °C.

**HPLC** CHIRALPAK IE, n-hexane/2-propanol = 80/20, flow rate 1.0 mL/min,  $\lambda = 254$  nm, retention time: 22.880 min (major), 26.883 min (minor).

**<sup>1</sup>H NMR** (400 MHz, DMSO-*d*<sup>6</sup>) δ 10.68 (s, 1H), 7.21 (d, *J* = 8.4 Hz, 2H), 7.11 (t, *J* = 7.6 Hz, 1H), 6.92 – 6.83 (m, 3H), 6.68 (t, *J* = 7.6 Hz, 1H), 6.13 (d, *J* = 7.2 Hz, 1H), 3.86 (d, *J* = 8.4 Hz, 1H), 3.73 (s, 3H), 3.71 (s, 3H), 3.53 (d, *J* = 8.4 Hz, 1H).

**<sup>13</sup>C NMR** (100 MHz, DMSO-*d*<sup>6</sup>) δ 186.5, 174.0, 159.9, 158.7, 142.4, 130.7, 127.5, 125.8, 124.8, 121.0, 120.9, 113.8, 109.6, 55.1, 52.7, 40.3, 36.4.

**HRMS** (ESI): exact mass calcd for C<sub>20</sub>H<sub>17</sub>NNaO<sub>5</sub><sup>+</sup> (M+Na)<sup>+</sup> requires *m/z* 374.0999, found *m/z* 374.1004 (Δ = +5 ppm). Known compound.<sup>9</sup>

**Methyl 2-((1*S*,2*R*,3*S*)-2-(4-methoxyphenyl)-2'-oxospiro[cyclopropane-1,3'-indolin]-3-yl)-2-oxoacetate (*ent*-3n)**

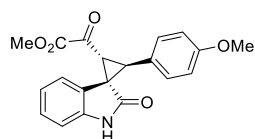

Colorless oil, 33.0 mg, 94% yield, 97:3 dr, 96% ee; *R*<sub>f</sub> = 0.45 (Pet/EtOAc, 1/1, v/v); [α]<sub>D</sub><sup>23</sup> = +77.86 (*c* = 1.76, CH<sub>2</sub>Cl<sub>2</sub>); reaction time: 36 h; reaction temperature: 30 °C.

**HPLC** CHIRALPAK IE, *n*-hexane/2-propanol = 80/20, flow rate 1.0 mL/min, λ = 254 nm, retention time: 22.903 min (minor), 25.690 min (major).

**Methyl 2-((1*R*,2*S*,3*R*)-2-([1,1'-biphenyl]-4-yl)-2'-oxospiro[cyclopropane-1,3'-indolin]-3-yl)-2-oxoacetate (3o)**

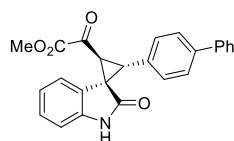

White solid, 38.5 mg, 97% yield, 99:1 dr, 99% ee; *R*<sub>f</sub> = 0.5 (Pet/EtOAc, 1/1, v/v); [α]<sub>D</sub><sup>23</sup> = +98.96 (*c* = 2.66, CH<sub>2</sub>Cl<sub>2</sub>); reaction time: 32 h; reaction temperature: 30 °C.

**HPLC** CHIRALPAK IG, *n*-hexane/2-propanol = 80/20, flow rate 1.0 mL/min, λ = 254 nm, retention time: 18.165 min (major), 25.285 min (minor).

**<sup>1</sup>H NMR** (400 MHz, DMSO-*d*<sup>6</sup>) δ 10.73 (s, 1H), 7.67 (t, *J* = 8.0 Hz, 4H), 7.51 – 7.32 (m, 5H), 7.12 (t, *J* = 7.6 Hz, 1H), 6.88 (d, *J* = 7.6 Hz, 1H), 6.68 (t, *J* = 7.6 Hz, 1H), 6.23 (d, *J* = 7.6 Hz, 1H), 3.97 (d, *J* = 8.8 Hz, 1H), 3.73 (s, 3H), 3.62 (d, *J* = 8.4 Hz, 1H).

$^{13}\text{C}$  NMR (100 MHz, DMSO- $d_6$ )  $\delta$  186.4, 174.0, 159.9, 142.5, 139.4, 139.2, 132.3, 130.1, 129.0, 127.6, 126.6, 125.7, 121.0, 120.9, 109.7, 52.7, 40.3, 38.6, 36.6.

**HRMS** (ESI): exact mass calcd for  $\text{C}_{25}\text{H}_{17}\text{NNaO}_4^+$  ( $\text{M}+\text{Na}$ ) $^+$  requires  $m/z$  420.1206, found  $m/z$  420.1201 ( $\Delta = -5$  ppm). Known compound.<sup>9</sup>

**Methyl 2-((1*R*,2*S*,3*R*)-2-(naphthalen-2-yl)-2'-oxospiro[cyclopropane-1,3'-indolin]-3-yl)-2-oxoacetate (3p)**

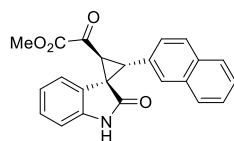

Light yellow solid, 35.2 mg, 95% yield, 98:2 dr, 99% ee;  $R_f = 0.45$  (Pet/EtOAc, 1/1, v/v);  $[\alpha]_D^{24} = +100.30$  ( $c = 0.56$ ,  $\text{CH}_2\text{Cl}_2$ ); reaction time: 48 h; reaction temperature: 30 °C.

**HPLC** CHIRALPAK IE, n-hexane/2-propanol = 80/20, flow rate 1.0 mL/min,  $\lambda = 254$  nm, retention time: 18.068 min (major), 20.622 min (minor).

$^1\text{H}$  NMR (400 MHz,  $\text{CD}_3\text{CN}$ )  $\delta$  8.73 (s, 1H), 7.89 – 7.83 (m, 3H), 7.80 (d,  $J = 8.4$  Hz, 1H), 7.55 – 7.49 (m, 2H), 7.30 (dd,  $J = 8.4, 2.0$  Hz, 1H), 7.10 (td,  $J = 8.0, 1.2$  Hz, 1H), 6.94 (d,  $J = 8.0$  Hz, 1H), 6.56 (t,  $J = 7.6$  Hz, 1H), 6.08 (d,  $J = 7.6$  Hz, 1H), 3.90 (d,  $J = 8.4$  Hz, 1H), 3.84 (d,  $J = 8.4$  Hz, 1H), 3.78 (s, 3H).

$^{13}\text{C}$  NMR (100 MHz,  $\text{CD}_3\text{CN}$ )  $\delta$  187.6, 175.0, 161.4, 143.2, 134.1, 133.8, 131.9, 129.2, 129.1, 128.9, 128.8, 128.7, 128.6, 127.5, 127.4, 126.7, 122.21, 122.15, 120.96, 109.8, 53.7, 41.3, 40.4, 38.5.

**HRMS** (ESI): exact mass calcd for  $\text{C}_{23}\text{H}_{17}\text{NNaO}_4^+$  ( $\text{M}+\text{Na}$ ) $^+$  requires  $m/z$  394.1050, found  $m/z$  394.1044 ( $\Delta = -6$  ppm). Known compound.<sup>9</sup>

**Methyl 2-oxo-2-((1*R*,2*S*,3*R*)-2'-oxo-2-(thiophen-2-yl)spiro[cyclopropane-1,3'-indolin]-3-yl) acetate (3q)**

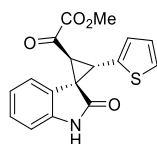

Yellow oil, 31.1 mg, 95% yield, 99:1 dr, 97% ee;  $R_f = 0.45$  (Pet/EtOAc, 1/1, v/v); m.p.: 160.2-163.1 °C;  $[\alpha]_D^{23} = +65.69$  ( $c = 0.75$ ,  $\text{CH}_2\text{Cl}_2$ ); reaction time: 36 h; reaction temperature: 30 °C.

**HPLC** CHIRALPAK IG, n-hexane/2-propanol = 80/20, flow rate 1.0 mL/min,  $\lambda = 254$  nm, retention

time: 16.750 min (major), 19.067 min (minor).

**<sup>1</sup>H NMR** (400 MHz, DMSO-*d*<sup>6</sup>) δ 10.75 (s, 1H), 7.46 (d, *J* = 5.2 Hz, 1H), 7.21 – 7.11 (m, 2H), 7.04 (dd, *J* = 4.8, 3.2 Hz, 1H), 6.90 (d, *J* = 8.0 Hz, 1H), 6.74 (t, *J* = 7.6 Hz, 1H), 6.35 (d, *J* = 7.6 Hz, 1H), 3.94 (d, *J* = 8.0 Hz, 1H), 3.71 (s, 3H), 3.57 (d, *J* = 8.0 Hz, 1H).

**<sup>13</sup>C NMR** (100 MHz, DMSO-*d*<sup>6</sup>) δ 185.9, 173.6, 159.7, 142.4, 136.1, 128.0, 127.9, 127.0, 126.7, 125.2, 121.1, 120.7, 109.8, 52.8, 40.5, 39.9, 31.5.

**HRMS** (ESI): exact mass calcd for C<sub>17</sub>H<sub>13</sub>NNaO<sub>4</sub>S<sup>+</sup> (M+Na)<sup>+</sup> requires *m/z* 350.0457, found *m/z* 350.0459 (Δ = +2 ppm).

### Methyl 2-((1*R*,2*S*,3*R*)-2-methyl-2'-oxospiro[cyclopropane-1,3'-indolin]-3-yl)-2-oxoacetate (**3r**)

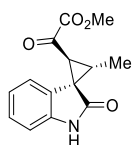

Yellow oil, 23.3 mg, 90% yield, 96:4 dr, 98% ee; *R*<sub>f</sub> = 0.55 (Pet/EtOAc, 1/1, v/v); [α]<sub>D</sub><sup>23</sup> = +153.71 (c = 0.53, CH<sub>2</sub>Cl<sub>2</sub>); reaction time: 36 h; reaction temperature: 30 °C.

**HPLC** CHIRALPAK ID, n-hexane/2-propanol = 80/20, flow rate 1.0 mL/min, λ = 254 nm, retention time: 11.205 min (major), 14.463 min (minor).

**<sup>1</sup>H NMR** (400 MHz, DMSO-*d*<sup>6</sup>) δ 10.60 (s, 1H), 7.27 – 7.16 (m, 2H), 6.99 (td, *J* = 7.6, 0.8 Hz, 1H), 6.91 (d, *J* = 7.6 Hz, 1H), 3.67 (s, 3H), 3.16 (d, *J* = 8.0 Hz, 1H), 2.34 – 2.22 (m, 1H), 1.32 (d, *J* = 6.4 Hz, 3H).

**<sup>13</sup>C NMR** (100 MHz, DMSO-*d*<sup>6</sup>) δ 187.1, 174.8, 160.0, 142.6, 127.5, 126.4, 122.0, 121.2, 109.8, 52.6, 41.4, 38.9, 28.2, 11.4.

**HRMS** (ESI): exact mass calcd for C<sub>14</sub>H<sub>13</sub>NNaO<sub>4</sub><sup>+</sup> (M+Na)<sup>+</sup> requires *m/z* 282.0737, found *m/z* 282.0730 (Δ = -7 ppm).

### Methyl 2-((1*S*,2*R*,3*S*)-2-methyl-2'-oxospiro[cyclopropane-1,3'-indolin]-3-yl)-2-oxoacetate (*ent*-**3r**)

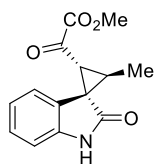

Yellow oil, 20.7 mg, 80% yield, 99:1 dr, 95% ee; *R*<sub>f</sub> = 0.55 (Pet/EtOAc, 1/1, v/v); [α]<sub>D</sub><sup>25</sup> = -64.98 (c = 1.01, CH<sub>2</sub>Cl<sub>2</sub>); reaction time: 36 h; reaction temperature: 30 °C.

**HPLC** CHIRALPAK ID, n-hexane/2-propanol = 80/20, flow rate 1.0 mL/min,  $\lambda$  = 254 nm, retention time: 11.238 min (minor), 13.540 min (major).

Methyl 2-oxo-2-((1*S*,2*S*,3*R*)-2'-oxo-2-phenylspiro[cyclopropane-1,3'-indolin]-3-yl)acetate (**4a**)

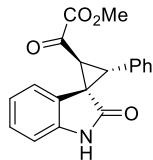

Light yellow oil;  $R_f$  = 0.5 (Pet/EtOAc, 1/1, v/v).

**$^1\text{H NMR}$**  (600 MHz, DMSO- $d_6$ )  $\delta$  10.66 (s, 1H), 7.38 – 7.18 (m, 6H), 7.15 (d,  $J$  = 7.8 Hz, 1H), 6.96 (t,  $J$  = 7.8 Hz, 1H), 6.91 (d,  $J$  = 7.8 Hz, 1H), 4.13 (d,  $J$  = 8.4 Hz, 1H), 3.86 (d,  $J$  = 8.4 Hz, 1H), 3.76 (s, 3H).

**HRMS** (ESI): exact mass calcd for  $\text{C}_{19}\text{H}_{15}\text{NNaO}_4^+$  ( $\text{M}+\text{Na}$ ) $^+$  requires  $m/z$  344.0893, found  $m/z$  344.0892 ( $\Delta$  = -1 ppm). Known compound.<sup>9</sup>

## General procedure for the synthesis of spiro-cyclopropane-oxindoles **6a-6c**

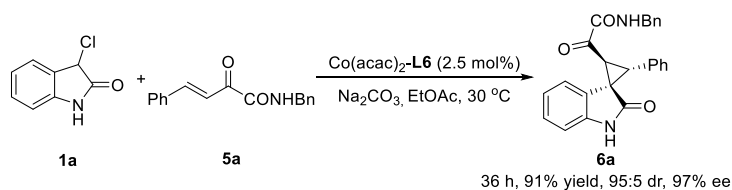

Preparation of  $\text{Co}(\text{acac})_2$  and **L6** solution: in a 2.0 mL volumetric flask,  $\text{Co}(\text{acac})_2$  (6.4 mg, 0.025 mmol) was added, then THF was added to make the total volume up to 2.0 mL. In a 2.0 mL volumetric flask, **L6** (17.6 mg, 0.025 mmol) was added, then THF was added to make the total volume up to 2.0 mL.

In a dry reaction tube, 200  $\mu\text{L}$  (2.5 mol%) of  $\text{Co}(\text{acac})_2$  solution and 200  $\mu\text{L}$  (2.5 mol%) of **L6** were added. Then, THF was removed under vacuum. After that,  $\beta,\gamma$ -unsaturated- $\alpha$ - ketoamides **5a** (26.5 mg, 0.1 mmol) and EtOAc (2.0 mL) were added and the reaction was stirred at 30 °C for 0.5 h. Subsequently, 3-chlorooxindoles **1a** (16.7 mg, 0.1 mmol) and  $\text{Na}_2\text{CO}_3$  (11.7 mg, 0.11 mmol) were added and the reaction was stirred at 30 °C until **1a** was consumed (detected by TLC, Pet/EtOAc, 1/1, v/v). Finally, the corresponding product **6a** was purified directly by flask column chromatography (Pet/EtOAc, 5/1-1/1, v/v).

*N*-benzyl-2-oxo-2-((1*R*,2*S*,3*R*)-2'-oxo-2-phenylspiro[cyclopropane-1,3'-indolin]-3-yl)acetamide (**6a**)

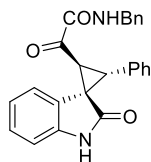

Light yellow oil, 36.0 mg, 91% yield, 95:5 dr, 97% ee;  $R_f = 0.4$  (Pet/EtOAc, 2/1, v/v);  $[\alpha]_{\text{D}}^{25} = +82.46$  ( $c = 0.69$ ,  $\text{CH}_2\text{Cl}_2$ ); reaction time: 36 h; reaction temperature: 30 °C.

**HPLC** CHIRALPAK IE, n-hexane/2-propanol = 70/30, flow rate 1.0 mL/min,  $\lambda = 254$  nm, retention time: 13.143 min (major), 21.757 min (minor).

**$^1\text{H}$  NMR** (600 MHz,  $\text{DMSO-d}_6$ )  $\delta$  10.64 (s, 1H), 9.24 (t,  $J = 6.6$  Hz, 1H), 7.37 – 7.21 (m, 10H), 7.09 (td,  $J = 7.8, 1.2$  Hz, 1H), 6.86 (d,  $J = 7.2$  Hz, 1H), 6.65 (t,  $J = 7.8$  Hz, 1H), 6.15 (d,  $J = 7.2$  Hz, 1H), 4.37 – 4.24 (m, 2H), 4.01 (d,  $J = 9.0$  Hz, 1H), 3.58 (d,  $J = 8.4$  Hz, 1H).

**$^{13}\text{C}$  NMR** (150 MHz,  $\text{DMSO-d}_6$ )  $\delta$  191.6, 174.0, 160.2, 142.5, 138.6, 133.4, 129.6, 128.4, 128.2, 127.6, 127.4, 127.3, 126.8, 126.0, 121.0, 120.7, 109.5, 42.1, 40.0, 37.8, 36.7.

**HRMS** (ESI): exact mass calcd for  $\text{C}_{25}\text{H}_{20}\text{N}_2\text{NaO}_3^+$  ( $\text{M}+\text{Na}$ ) $^+$  requires  $m/z$  419.1366, found  $m/z$  419.1373 ( $\Delta = +7$  ppm).

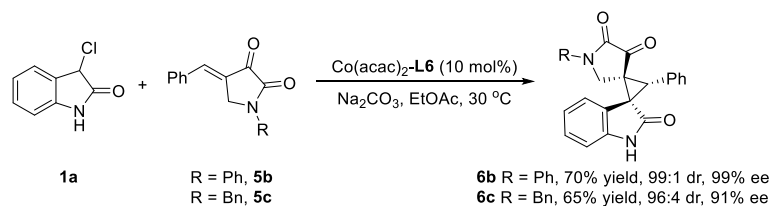

In a dry reaction tube, a mixture of 2,3-dioxopyrrolidine **5** (0.1 mmol), Co(acac)<sub>2</sub> (2.6 mg, 0.1 mmol, 10 mol%) and ligand **L6** (7.1 mg, 0.1 mmol, 10 mol%) in EtOAc (2.0 mL) were stirred at 30 °C for 0.5 h. After that, 3-chlorooxindole **1a** (16.7 mg, 0.1 mmol) and Na<sub>2</sub>CO<sub>3</sub> (11.7 mg, 0.11 mmol) were added. Subsequently, the reaction was stirred at 30 °C for 24 h. After the reaction was complete monitored by TLC (Pet/EtOAc, 3/1, v/v), the reaction was purified by flash column chromatography (Pet/EtOAc, 5/1-3/1, v/v) to give the product **6b** as a light yellow solid (27.6 mg, 70% yield, 99:1 dr, 99% ee) and **6c** as a light yellow solid (26.5 mg, 65% yield, 96:4 dr, 91% ee).

**(2'S,3R,3'S)-1'',3'-Diphenyldispiro[indoline-3,1'-cyclopropane-2',3''-pyrrolidine]-2,4'',5''-trione**

**(6b)**

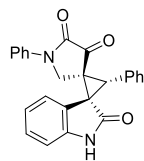

Light yellow solid, 27.6 mg, 70% yield, 99:1 dr, 99% ee;  $R_f = 0.35$  (Pet/EtOAc, 2/1, v/v);  $[\alpha]_D^{20} = -15.14$  ( $c = 0.78$ , CH<sub>2</sub>Cl<sub>2</sub>); reaction time: 24 h; reaction temperature: 30 °C.

**HPLC** CHIRALPAK ID, n-hexane/2-propanol = 60/40, flow rate 1.0 mL/min,  $\lambda = 254$  nm, retention time: 19.988 min (major), 26.047 min (minor).

**<sup>1</sup>H NMR** (600 MHz, CDCl<sub>3</sub>)  $\delta$  8.65 (s, 1H), 7.90 (d,  $J = 8.4$  Hz, 2H), 7.44 (t,  $J = 7.8$  Hz, 2H), 7.36 – 7.27 (m, 4H), 7.10 (d,  $J = 7.8$  Hz, 1H), 6.99 – 6.92 (m, 3H), 6.88 (t,  $J = 7.8$  Hz, 1H), 4.62 (d,  $J = 12.0$  Hz, 1H), 4.53 (d,  $J = 12.0$  Hz, 1H), 4.02 (s, 1H).

**<sup>13</sup>C NMR** (150 MHz, CDCl<sub>3</sub>)  $\delta$  191.6, 174.1, 157.8, 141.0, 138.5, 130.8, 129.5, 128.8, 128.6, 128.5, 128.3, 127.0, 122.4, 121.8, 119.4, 110.0, 48.4, 47.6, 43.3, 41.0.

**HRMS** (ESI): exact mass calcd for C<sub>25</sub>H<sub>18</sub>N<sub>2</sub>NaO<sub>3</sub><sup>+</sup> (M+Na)<sup>+</sup> requires  $m/z$  417.1210, found  $m/z$  417.1206 ( $\Delta = -4$  ppm). Known compound.<sup>10</sup>

(2'S,3R,3'S)-1''-benzyl-3'-phenyldispiro[indoline-3,1'-cyclopropane-2',3''-pyrrolidine]-2,4'',5''-trione (**6c**)

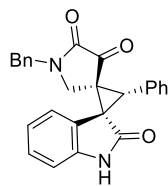

Light yellow solid, 26.5 mg, 65% yield, 96:4 dr, 91% ee;  $R_f = 0.35$  (Pet/EtOAc, 2/1, v/v);  $[\alpha]_D^{20} = -31.88$  ( $c = 0.69$ ,  $\text{CH}_2\text{Cl}_2$ ); reaction time: 24 h; reaction temperature: 30 °C.

**HPLC** CHIRALPAK IE, n-hexane/2-propanol = 60/40, flow rate 1.0 mL/min,  $\lambda = 254$  nm, retention time: 18.170 min (major), 21.755 min (minor).

**$^1\text{H NMR}$**  (600 MHz,  $\text{CDCl}_3$ )  $\delta$  8.73 (s, 1H), 6.86 – 6.78 (m, 5H), 6.77 – 6.71 (m, 3H), 6.64 (t,  $J = 7.2$  Hz, 1H), 6.53 (d,  $J = 7.8$  Hz, 1H), 6.38 (d,  $J = 8.4$  Hz, 1H), 6.34 (d,  $J = 8.4$  Hz, 2H), 6.30 (t,  $J = 7.8$  Hz, 1H), 4.35 (d,  $J = 14.4$  Hz, 1H), 4.08 (d,  $J = 14.4$  Hz, 1H), 3.50 (d,  $J = 12.6$  Hz, 1H), 3.42 (d,  $J = 13.2$  Hz, 1H), 3.28 (s, 1H).

**$^{13}\text{C NMR}$**  (150 MHz,  $\text{CDCl}_3$ )  $\delta$  192.2, 174.0, 159.3, 141.5, 134.7, 130.8, 129.2, 128.8, 128.52, 128.47, 128.42, 128.3, 128.1, 121.9, 110.0, 48.8, 47.6, 47.1, 43.3, 41.2.

**HRMS** (ESI): exact mass calcd for  $\text{C}_{26}\text{H}_{20}\text{N}_2\text{NaO}_3^+$  ( $\text{M}+\text{Na}$ ) $^+$  requires  $m/z$  431.1366, found  $m/z$  431.1366 ( $\Delta = 0$  ppm).



## Gram-scale synthesis of **3a**

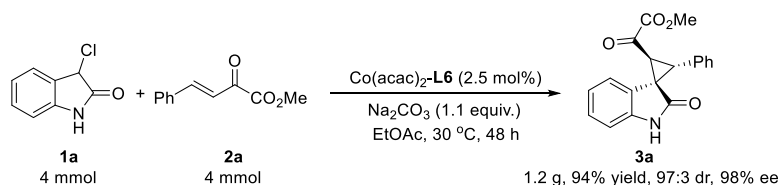

In a dry reaction tube, a mixture of  $\beta,\gamma$ -unsaturated- $\alpha$ -ketoester **2a** (760.0 mg, 4.0 mmol),  $\text{Co(acac)}_2$  (25.7 mg, 0.1 mmol, 2.5 mol%) and ligand **L6** (70.5 mg, 0.1 mmol, 2.5 mol%) in EtOAc (80.0 mL) were stirred at 30 °C for 6 h. After that, 3-chlorooxindole **1a** (668.0 mg, 4.0 mmol) and  $\text{Na}_2\text{CO}_3$  (466.4 mg, 4.4 mmol) were added. Subsequently, the reaction was stirred at 30 °C for 48 h. After the reaction was complete monitored by TLC ( $R_f = 0.4$ , Pet/EtOAc, 1/1, v/v), the reaction was purified by flash column chromatography (Pet/EtOAc, 5/1-1/1, v/v) to give the product **3a** as a colorless solid (1.2 g, 94% yield, 97:3 dr, 98% ee).

**Figure S1.** HPLC spectra of **3a** on a gram-scale

### HPLC Spectrum of **3a**

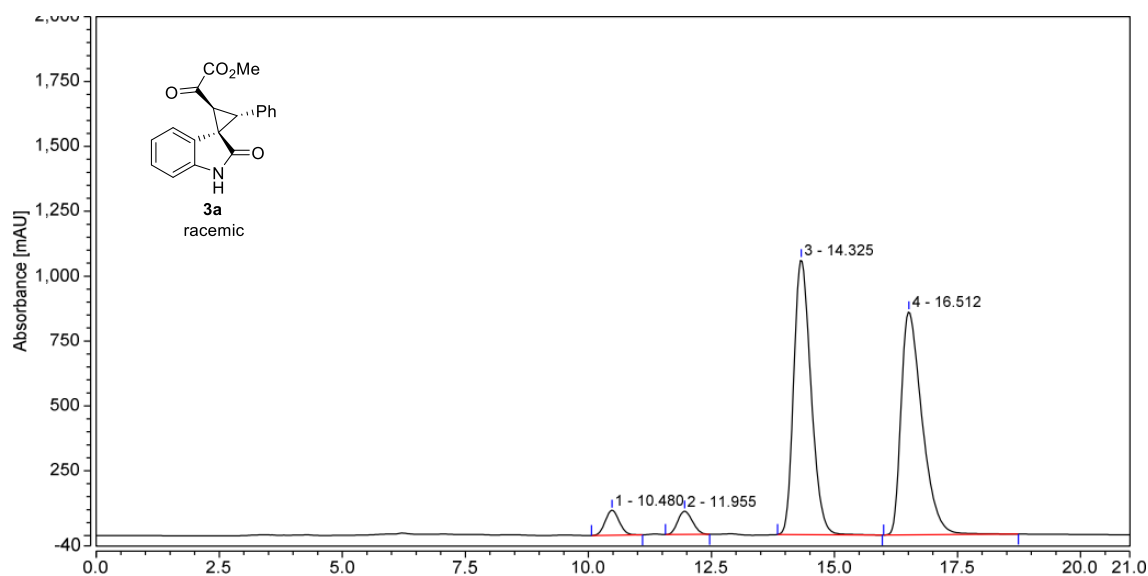

| Peak          | Retention Time<br>min | Area<br>mAU*min | Height<br>mAU   | Area<br>%     | Height<br>%   |
|---------------|-----------------------|-----------------|-----------------|---------------|---------------|
| 1             | 10.480                | 31.817          | 96.448          | 3.46          | 4.58          |
| 2             | 11.955                | 31.078          | 90.023          | 3.38          | 4.27          |
| 3             | 14.325                | 430.583         | 1060.196        | 46.84         | 50.33         |
| 4             | 16.512                | 425.876         | 859.651         | 46.32         | 40.81         |
| <b>Total:</b> |                       | <b>919.354</b>  | <b>2106.318</b> | <b>100.00</b> | <b>100.00</b> |

### HPLC Spectrum of 3a

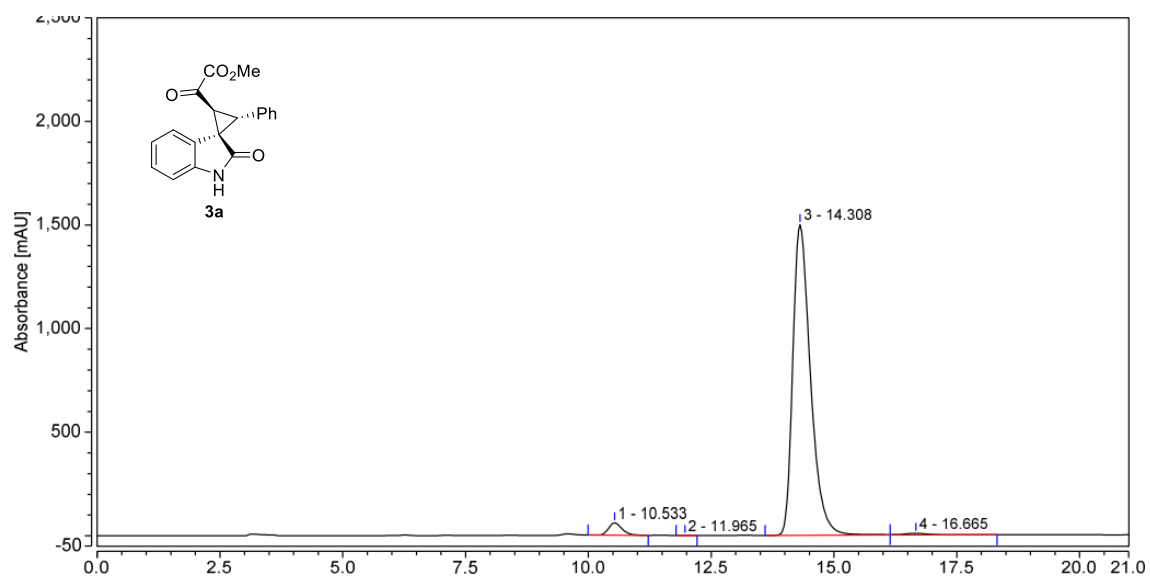

| Peak          | Retention Time<br>min | Area<br>mAU*min | Height<br>mAU   | Area<br>%     | Height<br>%   |
|---------------|-----------------------|-----------------|-----------------|---------------|---------------|
| 1             | 10.533                | 18.845          | 58.948          | 2.89          | 3.76          |
| 2             | 11.965                | 0.042           | 0.192           | 0.01          | 0.01          |
| 3             | 14.308                | 627.012         | 1499.485        | 96.24         | 95.69         |
| 4             | 16.665                | 5.632           | 8.448           | 0.86          | 0.54          |
| <b>Total:</b> |                       | <b>651.530</b>  | <b>1567.073</b> | <b>100.00</b> | <b>100.00</b> |

## Nonlinear effect experiment

Nonlinear effect experiment between the ee value of ligand **L6** and product **3a**

a) Preparation of catalyst **L6** solution: in a 5.0 mL volumetric flask, **L6** (35.3 mg, 0.05 mmol) was added, then THF was added to make the total volume up to 5.0 mL.

b) Preparation of catalyst *ent*-**L6** solution: in a 5.0 mL volumetric flask, *ent*-**L6** (35.3 mg, 0.05 mmol) was added, then THF was added to make the total volume up to 5.0 mL.

c) Preparation of metal solution: in a 5.0 mL volumetric flask, Co(acac)<sub>2</sub> (12.9 mg, 0.05 mmol) was added, then THF was added to make the total volume up to 5.0 mL.

For 0% ee of **L6**: 250  $\mu$ L **L6** was mixed with 250  $\mu$ L *ent*-**L6**;

For 20% ee of **L6**: 300  $\mu$ L **L6** was mixed with 200  $\mu$ L *ent*-**L6**;

For 40% ee of **L6**: 350  $\mu$ L **L6** was mixed with 150  $\mu$ L *ent*-**L6**;

For 60% ee of **L6**: 400  $\mu$ L **L6** was mixed with 100  $\mu$ L *ent*-**L6**;

For 80% ee of **L6**: 450  $\mu$ L **L6** was mixed with 50  $\mu$ L *ent*-**L6**;

In a dry reaction tube, 2.5 mol % of Co(acac)<sub>2</sub> solution and 2.5 mol % of **L6** (0-99% ee) solution were added. Then, THF was removed under vacuum. After that,  $\beta,\gamma$ -unsaturated- $\alpha$ -ketoester **2a** (0.1 mmol, 19.0 mg) and EtOAc (2.0 mL) were added and the reaction was stirred at 30 °C for 0.5 h. Subsequently, 3-chlorooxindole **1a** (0.1 mmol, 16.7 mg) and Na<sub>2</sub>CO<sub>3</sub> (11.7 mg, 0.11 mmol) were added and the reaction was stirred at 30 °C until **1a** was consumed (detected by TLC, Pet/EtOAc, 1/1, v/v). Finally, the corresponding product **3a** was purified directly by flask column chromatography (Pet/EtOAc, 5/1-1/1, v/v).

**Table S5:** the ee value of ligand **L6** and product **3a**

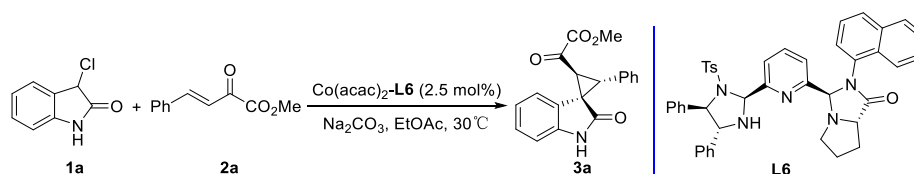

| entry | ee of L6 (%) | tested ee of L6 (%) | ee (3a) (%) |
|-------|--------------|---------------------|-------------|
| 1     | 0            | 11                  | 10          |
| 2     | 20           | 26                  | 29          |
| 3     | 40           | 51                  | 47          |
| 4     | 60           | 73                  | 72          |
| 5     | 80           | 85                  | 80          |
| 6     | >99          | >99                 | 99          |

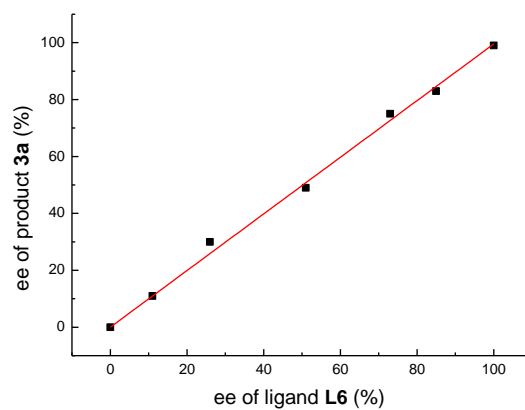

**Figure S2.** Determination of the linearity between ee values of ligand L6 and product 3a.

In the presence of ligand L6 with 0% ee

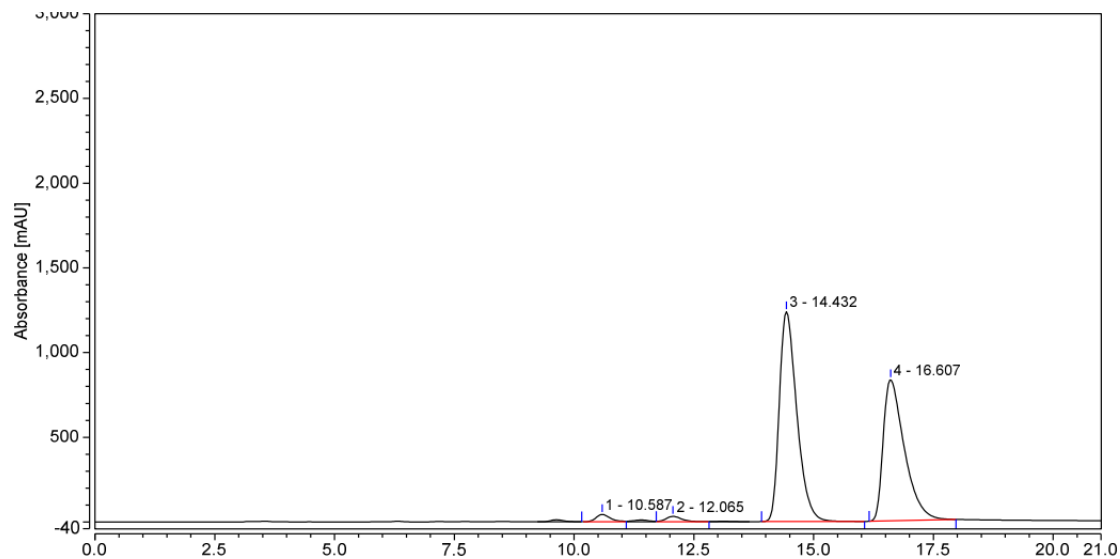

| Peak          | Retention Time<br>min | Area<br>mAU*min | Height<br>mAU   | Area<br>%     | Height<br>%   |
|---------------|-----------------------|-----------------|-----------------|---------------|---------------|
| 1             | 10.587                | 15.119          | 43.394          | 1.54          | 2.02          |
| 2             | 12.065                | 12.318          | 31.715          | 1.26          | 1.48          |
| 3             | 14.432                | 524.446         | 1238.673        | 53.58         | 57.68         |
| 4             | 16.607                | 427.007         | 833.556         | 43.62         | 38.82         |
| <b>Total:</b> |                       | <b>978.889</b>  | <b>2147.338</b> | <b>100.00</b> | <b>100.00</b> |

In the presence of ligand L6 with 20% ee

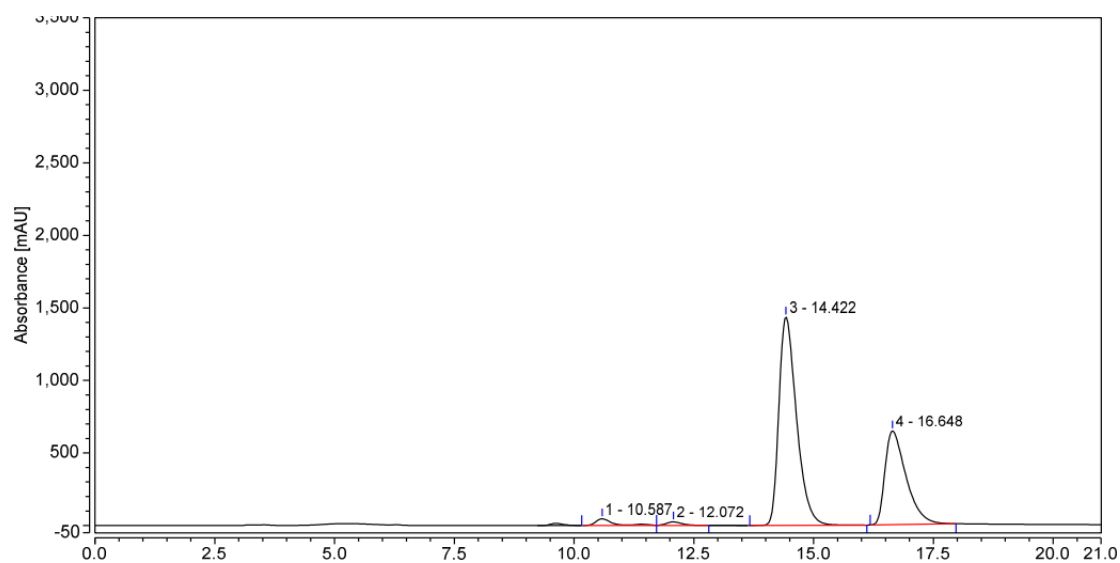

| Peak          | Retention Time<br>min | Area<br>mAU*min | Height<br>mAU   | Area<br>%     | Height<br>%   |
|---------------|-----------------------|-----------------|-----------------|---------------|---------------|
| 1             | 10.587                | 19.426          | 46.696          | 2.00          | 2.17          |
| 2             | 12.072                | 9.730           | 24.806          | 1.00          | 1.15          |
| 3             | 14.422                | 612.766         | 1436.066        | 63.04         | 66.67         |
| 4             | 16.648                | 330.167         | 646.575         | 33.96         | 30.02         |
| <b>Total:</b> |                       | <b>972.089</b>  | <b>2154.143</b> | <b>100.00</b> | <b>100.00</b> |

In the presence of ligand L6 with 40% ee

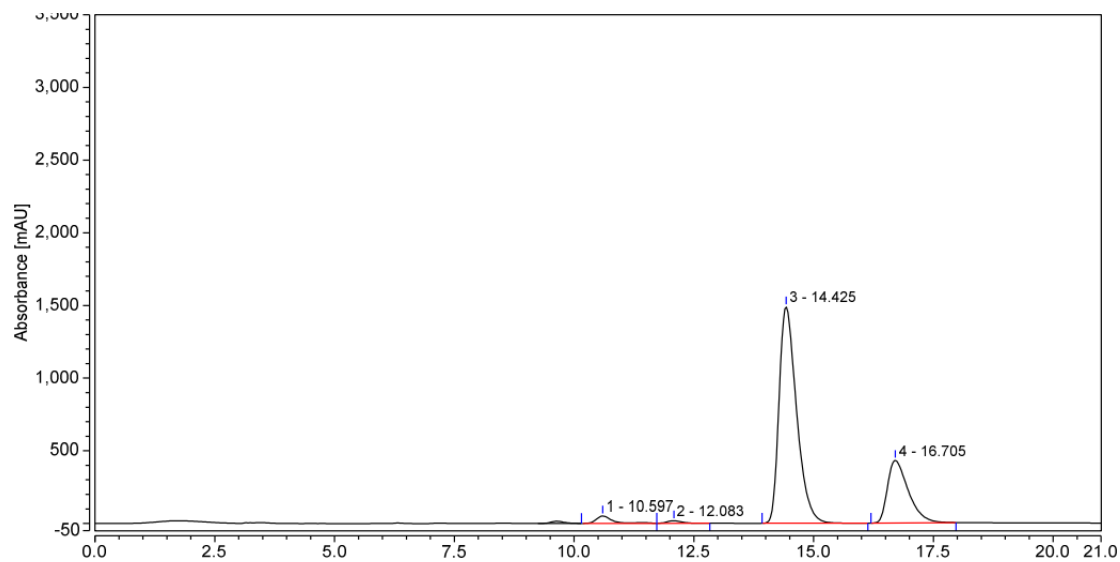

| Peak          | Retention Time<br>min | Area<br>mAU*min | Height<br>mAU   | Area<br>%     | Height<br>%   |
|---------------|-----------------------|-----------------|-----------------|---------------|---------------|
| 1             | 10.597                | 20.229          | 50.988          | 2.31          | 2.56          |
| 2             | 12.083                | 6.567           | 17.891          | 0.75          | 0.90          |
| 3             | 14.425                | 631.607         | 1489.323        | 72.16         | 74.86         |
| 4             | 16.705                | 216.841         | 431.175         | 24.77         | 21.67         |
| <b>Total:</b> |                       | <b>875.243</b>  | <b>1989.377</b> | <b>100.00</b> | <b>100.00</b> |

In the presence of ligand **L6** with 60% ee

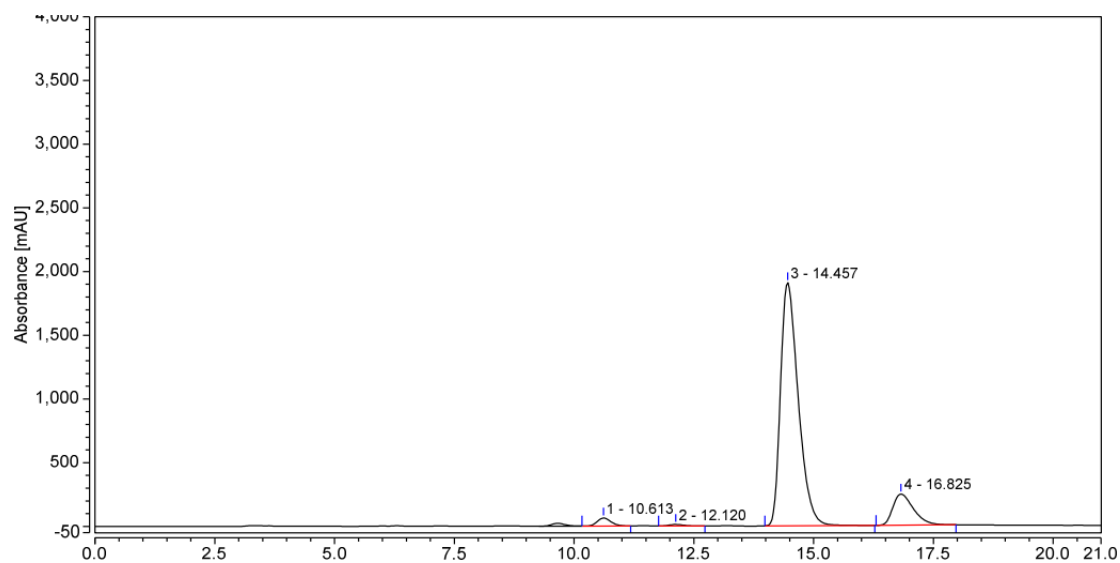

| Peak          | Retention Time<br>min | Area<br>mAU*min | Height<br>mAU   | Area<br>%     | Height<br>%   |
|---------------|-----------------------|-----------------|-----------------|---------------|---------------|
| 1             | 10.613                | 20.987          | 62.974          | 2.17          | 2.82          |
| 2             | 12.120                | 4.257           | 12.086          | 0.44          | 0.54          |
| 3             | 14.457                | 817.797         | 1909.400        | 84.73         | 85.65         |
| 4             | 16.825                | 122.195         | 244.728         | 12.66         | 10.98         |
| <b>Total:</b> |                       | <b>965.236</b>  | <b>2229.188</b> | <b>100.00</b> | <b>100.00</b> |

In the presence of ligand **L6** with 80% ee

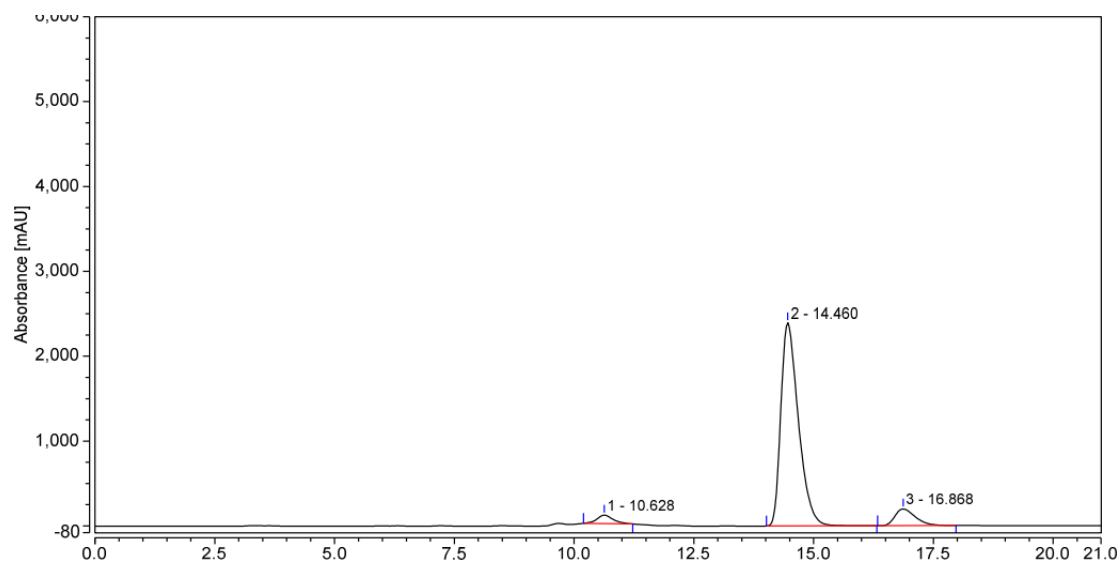

| Peak          | Retention Time<br>min | Area<br>mAU*min | Height<br>mAU   | Area<br>%     | Height<br>%   |
|---------------|-----------------------|-----------------|-----------------|---------------|---------------|
| 1             | 10.628                | 38.851          | 99.394          | 3.37          | 3.69          |
| 2             | 14.460                | 1015.852        | 2394.399        | 88.17         | 89.00         |
| 3             | 16.868                | 97.446          | 196.413         | 8.46          | 7.30          |
| <b>Total:</b> |                       | <b>1152.150</b> | <b>2690.206</b> | <b>100.00</b> | <b>100.00</b> |

In the presence of ligand **L6** with >99% ee

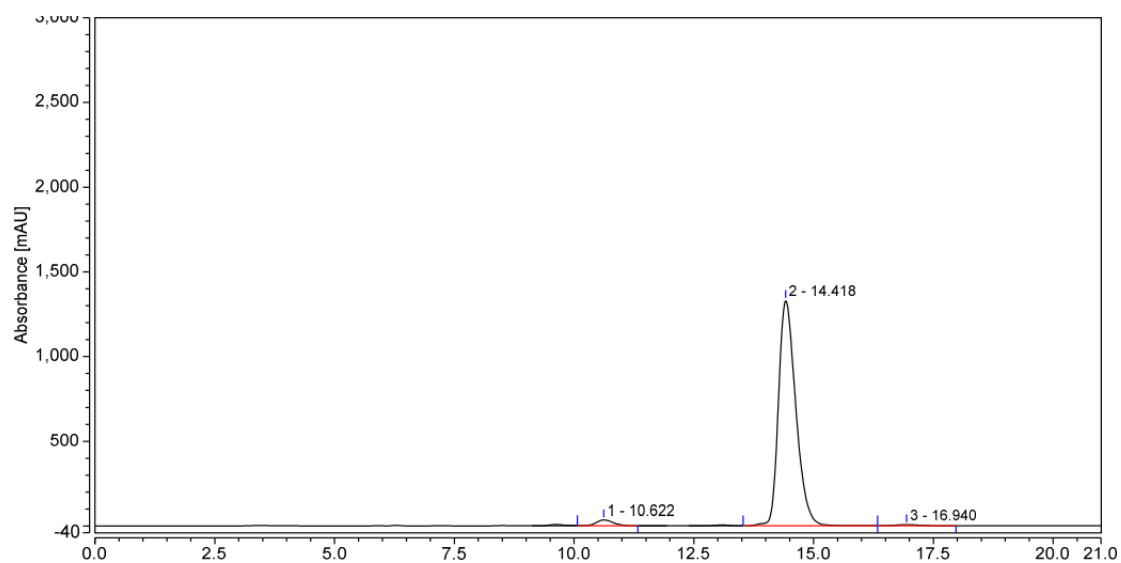

| Peak          | Retention Time<br>min | Area<br>mAU*min | Height<br>mAU   | Area<br>%     | Height<br>%   |
|---------------|-----------------------|-----------------|-----------------|---------------|---------------|
| 1             | 10.622                | 14.906          | 34.933          | 2.58          | 2.55          |
| 2             | 14.418                | 558.423         | 1330.870        | 96.81         | 96.99         |
| 3             | 16.940                | 3.476           | 6.402           | 0.60          | 0.47          |
| <b>Total:</b> |                       | <b>576.805</b>  | <b>1372.205</b> | <b>100.00</b> | <b>100.00</b> |

Figure S3. HPLC of **3a** with different ee value of ligand **L6**

## Transformation of the product **3a**

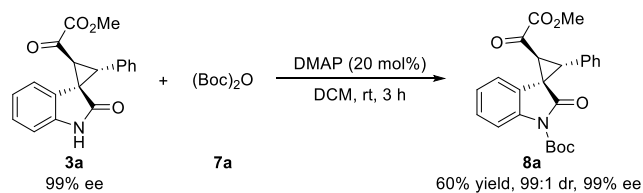

(Boc)<sub>2</sub>O (32.7 mg, 0.15 mmol) and DMAP (2.4 mg, 20 mol%) were added to a solution of **3a** (32.1 mg, 0.1 mmol) in DCM (2.0 mL). Then, the mixture was stirred for 3 h at room temperature until **3a** was consumed (detected by TLC). Finally, the corresponding product **8a** (25.3 mg, 60% yield, 99:1 dr, 99% ee) was purified directly by flask column chromatography (Pet/EtOAc, 50/1-5/1, v/v) as a white solid.

### Tert-butyl (1*R*,2*S*,3*R*)-2-(2-methoxy-2-oxoacetyl)-2'-oxo-3-phenylspiro[cyclopropane-1,3'-indolin e]-1'-carboxylate (**8a**)

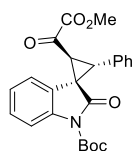

White solid, 25.3 mg, 60% yield, 99:1 dr, 99% ee;  $R_f = 0.4$  (Pet/EtOAc, 5/1, v/v);  $[\alpha]_D^{24} = +124.49$  ( $c = 1.01$ , CH<sub>2</sub>Cl<sub>2</sub>); reaction time: 3 h; reaction temperature: 25 °C.

**HPLC** CHIRALPAK IE, n-hexane/2-propanol = 80/20, flow rate 1.0 mL/min,  $\lambda = 254$  nm, retention time: 14.720 min (major), 16.880 min (minor).

**<sup>1</sup>H NMR** (400 MHz, CDCl<sub>3</sub>)  $\delta$  7.88 (d,  $J = 8.0$  Hz, 1H), 7.32 – 7.29 (m, 3H), 7.22 (td,  $J = 7.6, 1.2$  Hz, 1H), 7.19 – 7.16 (m, 2H), 6.82 (td,  $J = 8.0, 0.8$  Hz, 1H), 6.03 (dd,  $J = 7.6, 1.6$  Hz, 1H), 4.10 (d,  $J = 8.8$  Hz, 1H), 3.86 (s, 3H), 3.51 (d,  $J = 8.4$  Hz, 1H), 1.65 (s, 9H).

**HRMS** (ESI): exact mass calcd for C<sub>24</sub>H<sub>23</sub>NNaO<sub>6</sub><sup>+</sup> (M+Na)<sup>+</sup> requires  $m/z$  444.1418, found  $m/z$  444.1424 ( $\Delta = +6$  ppm). Known compound.<sup>9</sup>

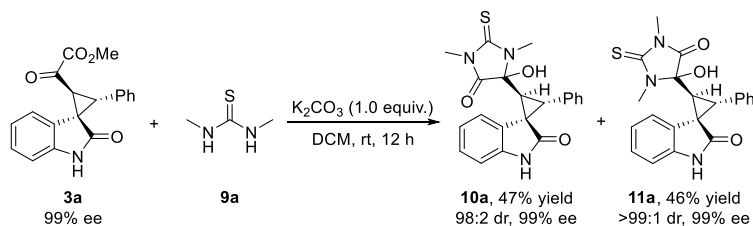

In a test tube, *N,N*-dimethylthiourea **9a** (41.7 mg, 0.4 mmol), **3a** (32.1 mg, 0.1 mmol) and K<sub>2</sub>CO<sub>3</sub> (13.8 mg, 0.1 mmol) were added. Then, DCM (2.0 mL) was added and the mixture was stirred at room



temperature until **3a** was consumed (determined by TLC). Then the solvent was removed and the mixture was purified by flask column chromatography (Pet/EtOAc, 5/1-3/1, v/v) to afford the products.

**(1R,2S,3R)-2-(4-Hydroxy-1,3-dimethyl-5-oxo-2-thioxoimidazolidin-4-yl)-3-phenylspiro[cyclopropane-1,3'-indolin]-2'-one (10a)**

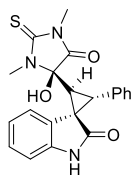

White solid, 18.5 mg, 47% yield, 98:2 dr, 99% ee; m.p.: 188.9-191.3 °C;  $R_f = 0.3$  (Pet/EtOAc, 2/1, v/v);  $[\alpha]_D^{23} = -35.22$  ( $c = 1.05$ ,  $\text{CH}_2\text{Cl}_2$ ); reaction time: 12 h; reaction temperature: 25 °C.

**HPLC** CHIRALPAK IE, n-hexane/2-propanol = 90/10, flow rate 1.0 mL/min,  $\lambda = 254$  nm, retention time: 35.127 min (major), 48.557 min (minor).

**<sup>1</sup>H NMR** (400 MHz,  $\text{CDCl}_3$ )  $\delta$  8.84 (s, 1H), 8.10 (s, 1H), 7.39 – 7.29 (m, 3H), 7.23 – 7.16 (m, 2H), 7.08 (td,  $J = 7.6, 1.2$  Hz, 1H), 6.91 (d,  $J = 8.0$  Hz, 1H), 6.68 (td,  $J = 7.6, 0.8$  Hz, 1H), 5.95 (d,  $J = 7.6$  Hz, 1H), 4.12 (d,  $J = 8.4$  Hz, 1H), 3.47 (s, 3H), 3.24 (s, 3H), 2.56 (d,  $J = 8.0$  Hz, 1H).

**<sup>13</sup>C NMR** (100 MHz,  $\text{CDCl}_3$ )  $\delta$  182.7, 179.5, 173.5, 140.1, 132.4, 129.6, 129.0, 128.5, 127.8, 126.0, 122.6, 120.9, 110.7, 84.1, 39.8, 36.8, 36.4, 29.6, 28.2.

**HRMS** (ESI): exact mass calcd for  $\text{C}_{21}\text{H}_{19}\text{N}_3\text{NaO}_3\text{S}^+$  ( $\text{M}+\text{Na}$ )<sup>+</sup> requires  $m/z$  416.1039, found  $m/z$  416.1045 ( $\Delta = +6$  ppm).

**(1R,2S,3R)-2-((S)-4-Hydroxy-1,3-dimethyl-5-oxo-2-thioxoimidazolidin-4-yl)-3-phenylspiro [cyclopropane-1,3'-indolin]-2'-one (11a)**

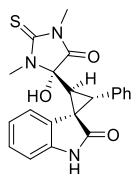

Yellow solid, 18.1 mg, 46% yield, >99:1 dr, 99% ee; m.p.: 229.8-232.5 °C;  $R_f = 0.25$  (Pet/EtOAc, 2/1, v/v);  $[\alpha]_D^{23} = +21.99$  ( $c = 0.69$ ,  $\text{CH}_2\text{Cl}_2$ ); reaction time: 12 h; reaction temperature: 25 °C.

**HPLC** CHIRALPAK IG, n-hexane/2-propanol = 90/10, flow rate 1.0 mL/min,  $\lambda = 254$  nm, retention time: 18.562 min (major), 25.237 min (minor).

**<sup>1</sup>H NMR** (400 MHz, CDCl<sub>3</sub>) δ 8.53 (s, 1H), 8.10 (s, 1H), 7.29 – 7.22 (m, 3H), 7.18 (td, *J* = 7.6, 1.2 Hz, 1H), 7.10 – 7.04 (m, 2H), 7.01 (d, *J* = 7.6 Hz, 1H), 6.75 (td, *J* = 7.6, 1.2 Hz, 1H), 5.88 (d, *J* = 7.6 Hz, 1H), 4.12 (d, *J* = 8.8 Hz, 1H), 3.41 (s, 3H), 3.12 (s, 3H), 2.39 (d, *J* = 8.8 Hz, 1H).

**<sup>13</sup>C NMR** (100 MHz, CDCl<sub>3</sub>) δ 182.4, 180.2, 171.1, 139.4, 132.3, 130.2, 128.7, 128.3, 128.2, 125.6, 123.1, 122.0, 110.6, 87.2, 40.2, 38.9, 38.3, 28.67, 28.65.

**HRMS** (ESI): exact mass calcd for C<sub>21</sub>H<sub>19</sub>N<sub>3</sub>NaO<sub>3</sub>S<sup>+</sup> (M+Na)<sup>+</sup> requires *m/z* 416.1039, found *m/z* 416.1041 (Δ = +2 ppm).

## X-ray data of 8a

Figure S4. X-Ray crystal structure of **8a** (Recrystallization solvent: DCM/Pet).

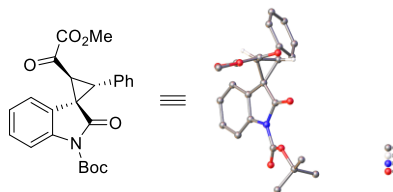

Table S6. Crystal data and structure refinement for (1*R*,2*S*,3*R*)-**8a**

|                                             |                                                               |
|---------------------------------------------|---------------------------------------------------------------|
| Identification code                         | (1 <i>R</i> ,2 <i>S</i> ,3 <i>R</i> )- <b>8a</b>              |
| Empirical formula                           | C <sub>24</sub> H <sub>23</sub> NO <sub>6</sub>               |
| Formula weight                              | 421.43                                                        |
| Temperature/K                               | 293                                                           |
| Crystal system                              | monoclinic                                                    |
| Space group                                 | P2 <sub>1</sub>                                               |
| a/Å                                         | 10.51870(10)                                                  |
| b/Å                                         | 9.68800(10)                                                   |
| c/Å                                         | 10.81100(10)                                                  |
| α/°                                         | 90                                                            |
| β/°                                         | 93.3660(10)                                                   |
| γ/°                                         | 90                                                            |
| Volume/Å <sup>3</sup>                       | 1099.796(19)                                                  |
| Z                                           | 2                                                             |
| ρ <sub>calc</sub> /cm <sup>3</sup>          | 1.273                                                         |
| μ/mm <sup>-1</sup>                          | 0.758                                                         |
| F(000)                                      | 444.0                                                         |
| Crystal size/mm <sup>3</sup>                | 0.15 × 0.08 × 0.06                                            |
| Radiation                                   | CuKα (λ = 1.54184)                                            |
| 2θ range for data collection/°              | 8.192 to 142.772                                              |
| Index ranges                                | -12 ≤ h ≤ 12, -11 ≤ k ≤ 11, -13 ≤ l ≤ 13                      |
| Reflections collected                       | 28934                                                         |
| Independent reflections                     | 4237 [R <sub>int</sub> = 0.0289, R <sub>sigma</sub> = 0.0145] |
| Data/restraints/parameters                  | 4237/8/284                                                    |
| Goodness-of-fit on F <sup>2</sup>           | 1.028                                                         |
| Final R indexes [I ≥ 2σ (I)]                | R <sub>1</sub> = 0.0442, wR <sub>2</sub> = 0.1176             |
| Final R indexes [all data]                  | R <sub>1</sub> = 0.0450, wR <sub>2</sub> = 0.1190             |
| Largest diff. peak/hole / e Å <sup>-3</sup> | 0.19/-0.24                                                    |
| Flack parameter                             | 0.03(6)                                                       |

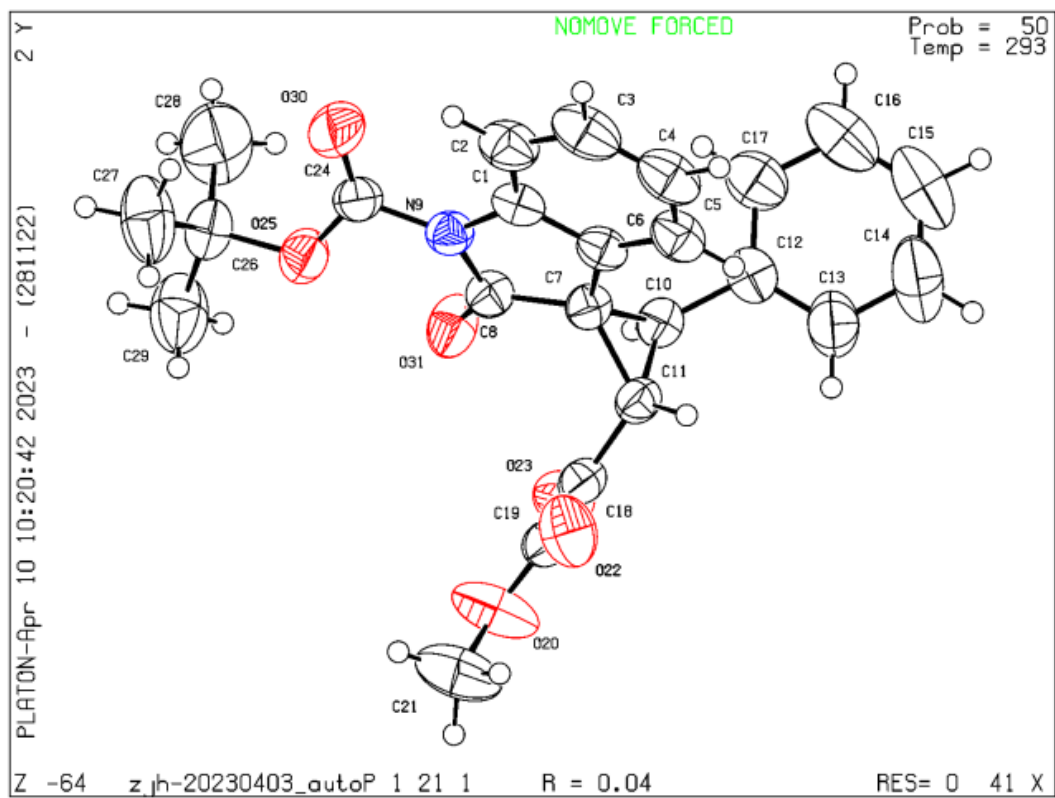

## X-ray data of 10a

Figure S5. X-Ray crystal structure of **10a** (Recrystallization solvent: DCM/Pet). (CCDC: 2322316)

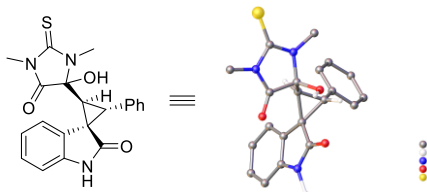

Table S7. Crystal data and structure refinement for **(1R,2S,3R)-10a**

|                                             |                                                                 |
|---------------------------------------------|-----------------------------------------------------------------|
| Identification code                         | <b>(1R,2S,3R)-10a</b>                                           |
| Empirical formula                           | C <sub>21</sub> H <sub>19</sub> N <sub>3</sub> O <sub>3</sub> S |
| Formula weight                              | 393.45                                                          |
| Temperature/K                               | 293(2)                                                          |
| Crystal system                              | trigonal                                                        |
| Space group                                 | R3                                                              |
| a/Å                                         | 21.7227(2)                                                      |
| b/Å                                         | 21.7227(2)                                                      |
| c/Å                                         | 11.97970(10)                                                    |
| $\alpha$ /°                                 | 90                                                              |
| $\beta$ /°                                  | 90                                                              |
| $\gamma$ /°                                 | 120                                                             |
| Volume/Å <sup>3</sup>                       | 4895.58(10)                                                     |
| Z                                           | 9                                                               |
| $\rho_{\text{calc}}/\text{cm}^3$            | 1.201                                                           |
| $\mu/\text{mm}^{-1}$                        | 1.526                                                           |
| F(000)                                      | 1854.0                                                          |
| Crystal size/mm <sup>3</sup>                | 0.22 × 0.21 × 0.18                                              |
| Radiation                                   | CuK $\alpha$ ( $\lambda$ = 1.54184)                             |
| 2 $\theta$ range for data collection/°      | 8.14 to 142.976                                                 |
| Index ranges                                | -26 ≤ h ≤ 23, -24 ≤ k ≤ 26, -14 ≤ l ≤ 14                        |
| Reflections collected                       | 24617                                                           |
| Independent reflections                     | 4218 [Rint = 0.0261, Rsigma = 0.0166]                           |
| Data/restraints/parameters                  | 4218/1/259                                                      |
| Goodness-of-fit on F <sup>2</sup>           | 1.029                                                           |
| Final R indexes [I ≥ 2 $\sigma$ (I)]        | R1 = 0.0329, wR2 = 0.0930                                       |
| Final R indexes [all data]                  | R1 = 0.0334, wR2 = 0.0937                                       |
| Largest diff. peak/hole / e Å <sup>-3</sup> | 0.15/-0.15                                                      |
| Flack parameter                             | 0.004(11)                                                       |

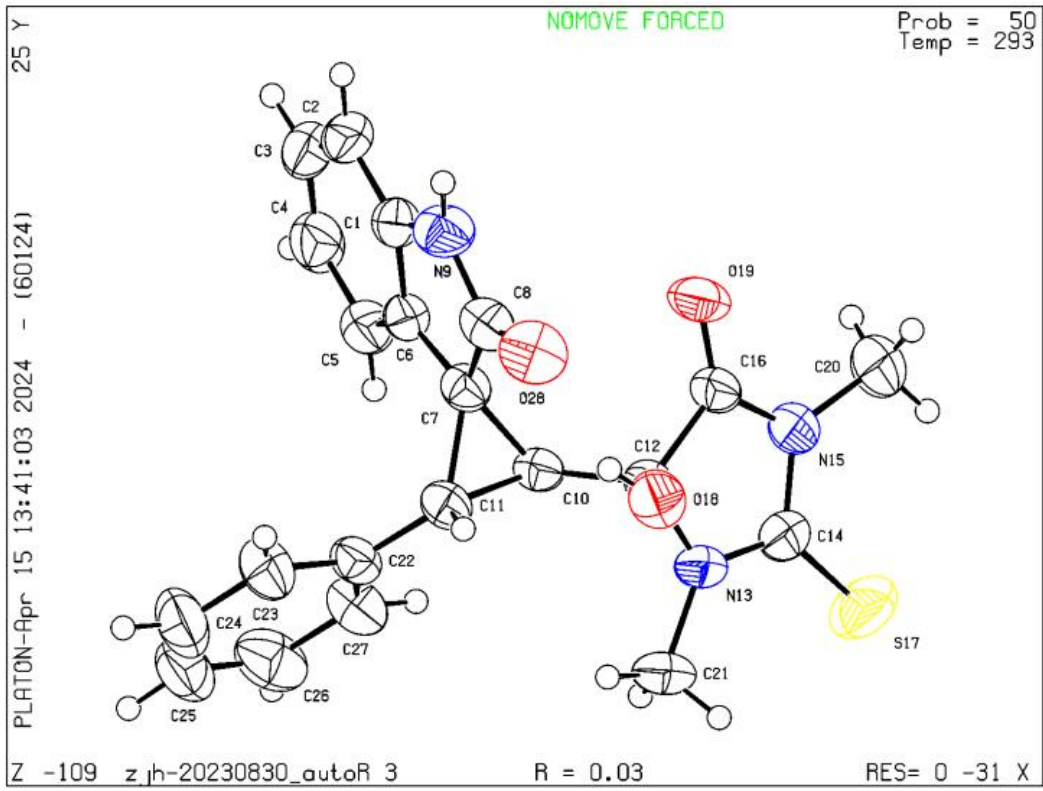

# NMR Spectra

<sup>1</sup>H NMR Spectrum of L11 (400 MHz, CDCl<sub>3</sub>)

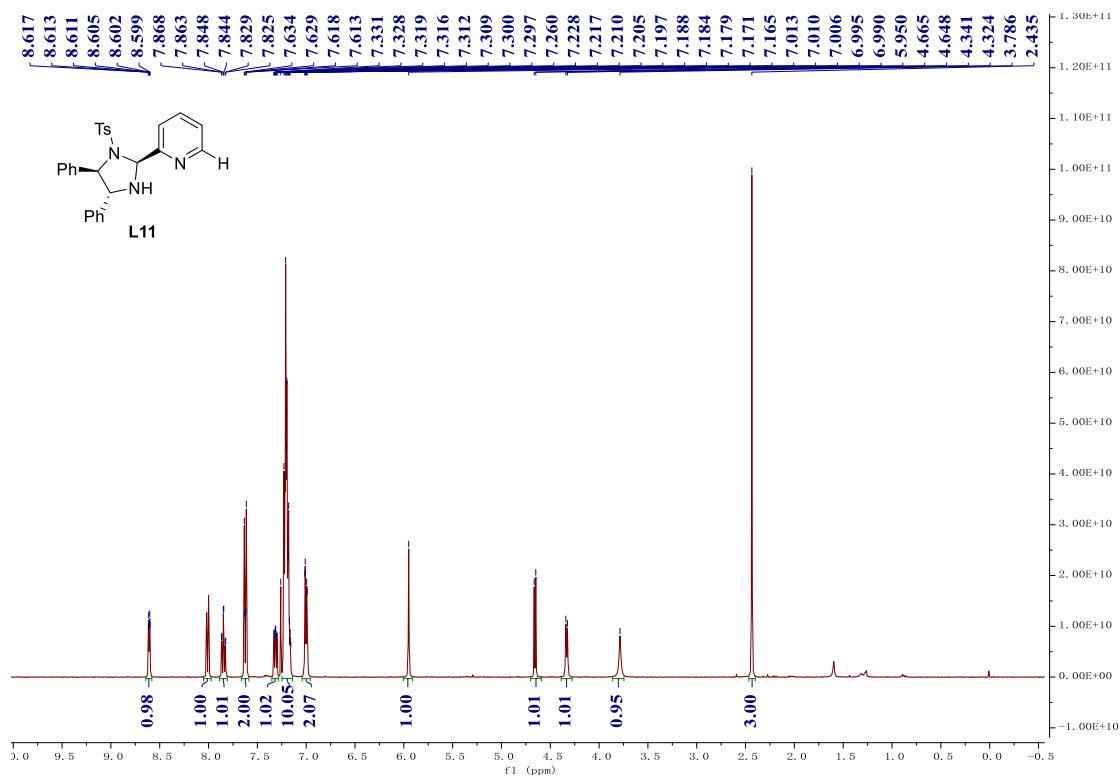

<sup>13</sup>C NMR Spectrum of L11 (100 MHz, CDCl<sub>3</sub>)

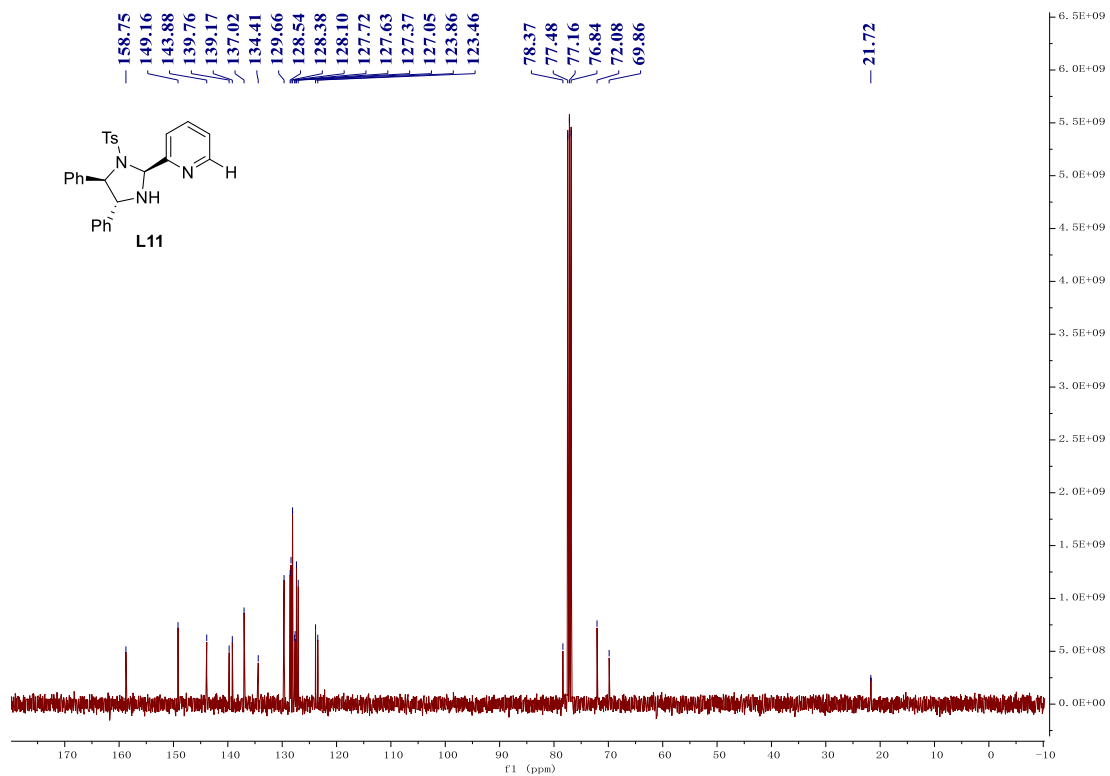

<sup>1</sup>H NMR Spectrum of **3a** (400 MHz, DMSO-d<sup>6</sup>)

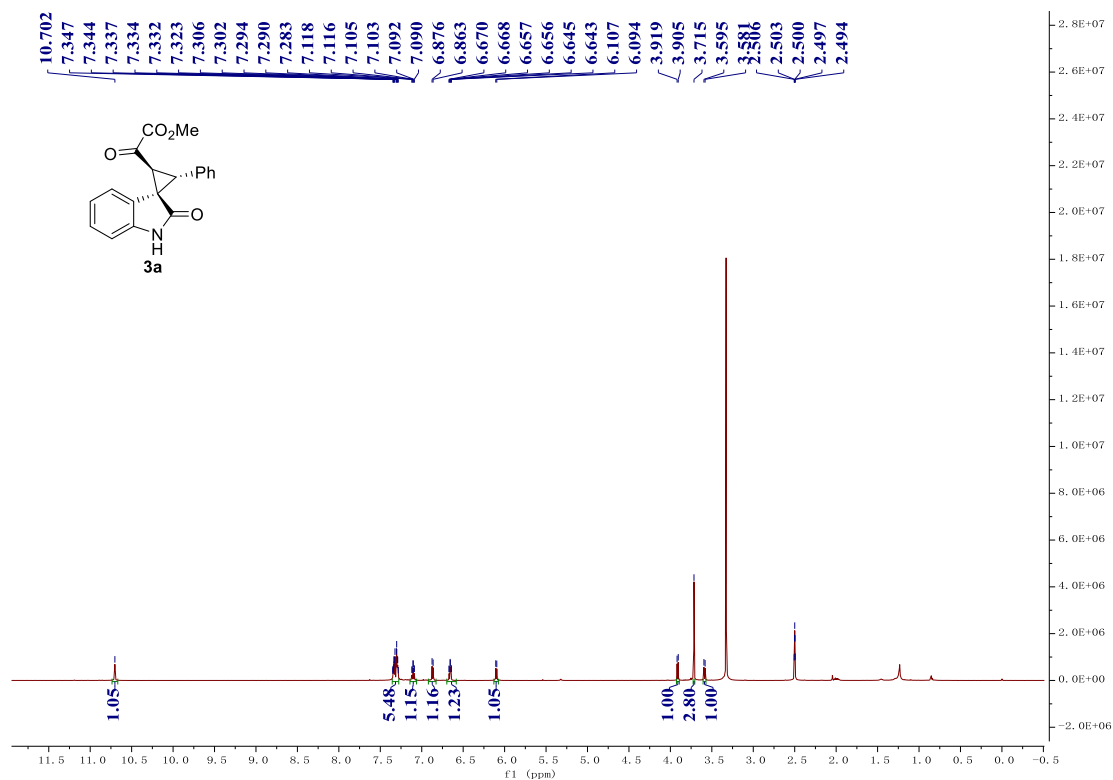

<sup>13</sup>C NMR Spectrum of **3a** (100 MHz, DMSO-d<sup>6</sup>)

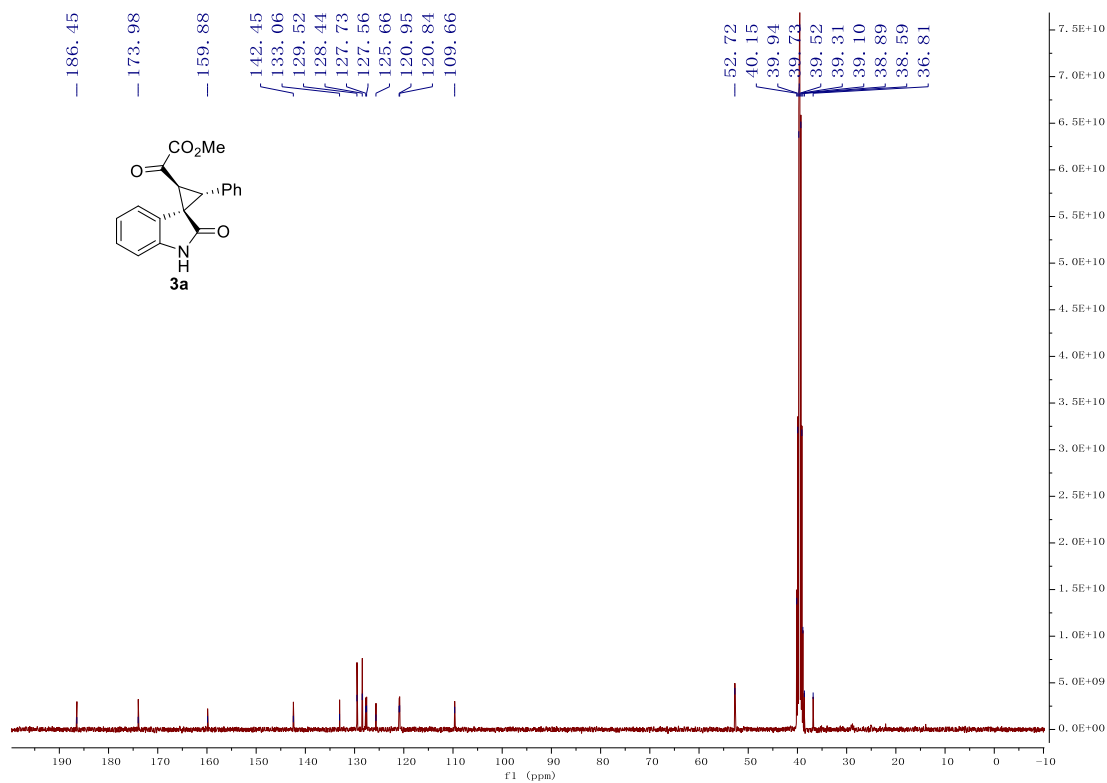



<sup>1</sup>H NMR Spectrum of **3b** (400 MHz, DMSO-d<sup>6</sup>)

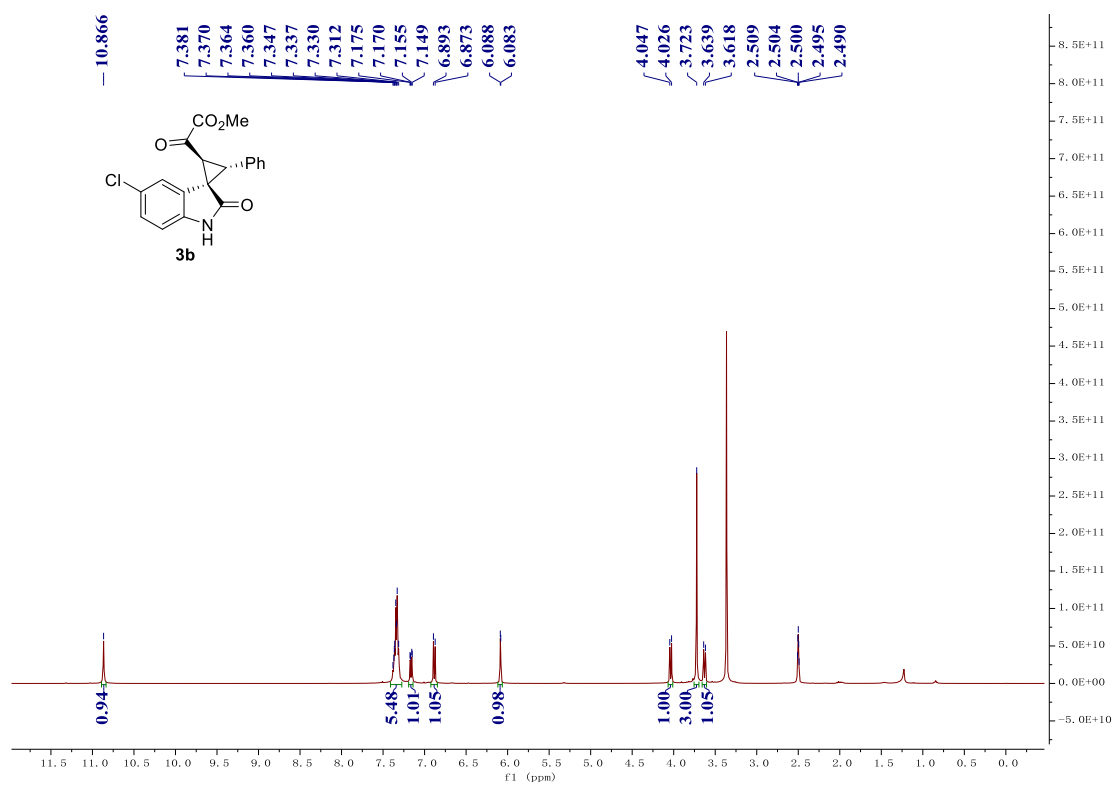

<sup>13</sup>C NMR Spectrum of **3b** (100 MHz, DMSO-d<sup>6</sup>)

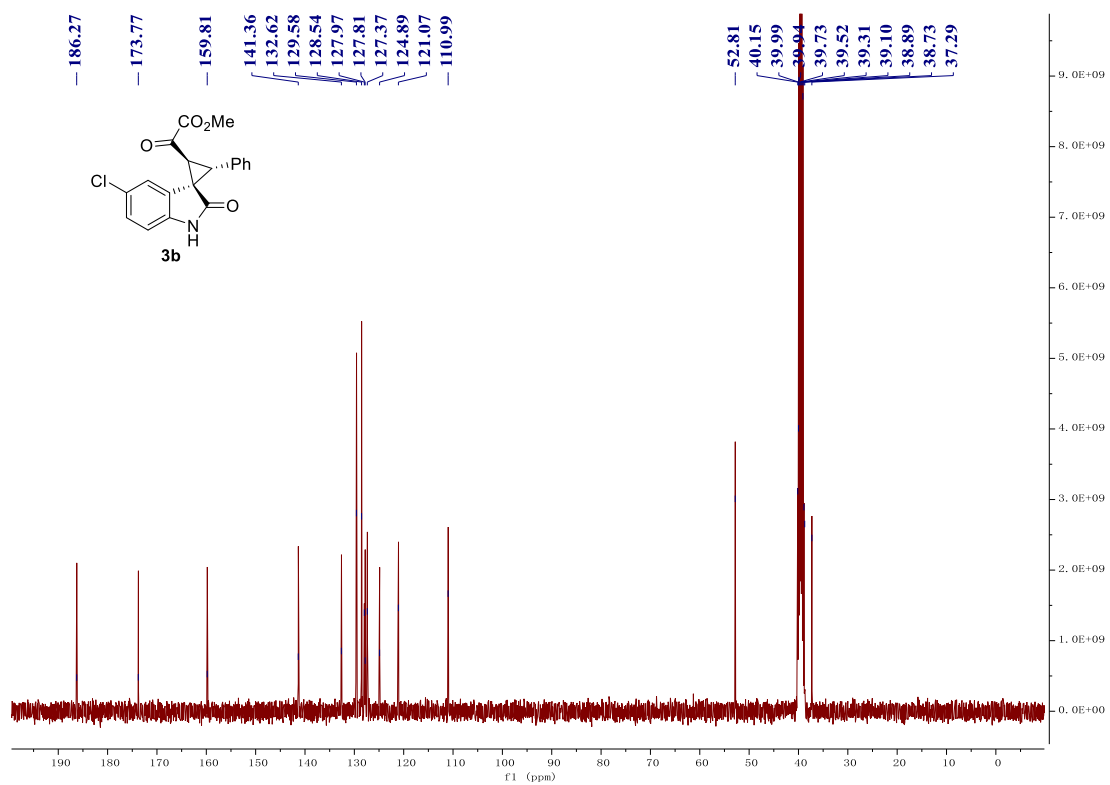

<sup>1</sup>H NMR Spectrum of **3c** (400 MHz, DMSO-d<sup>6</sup>)

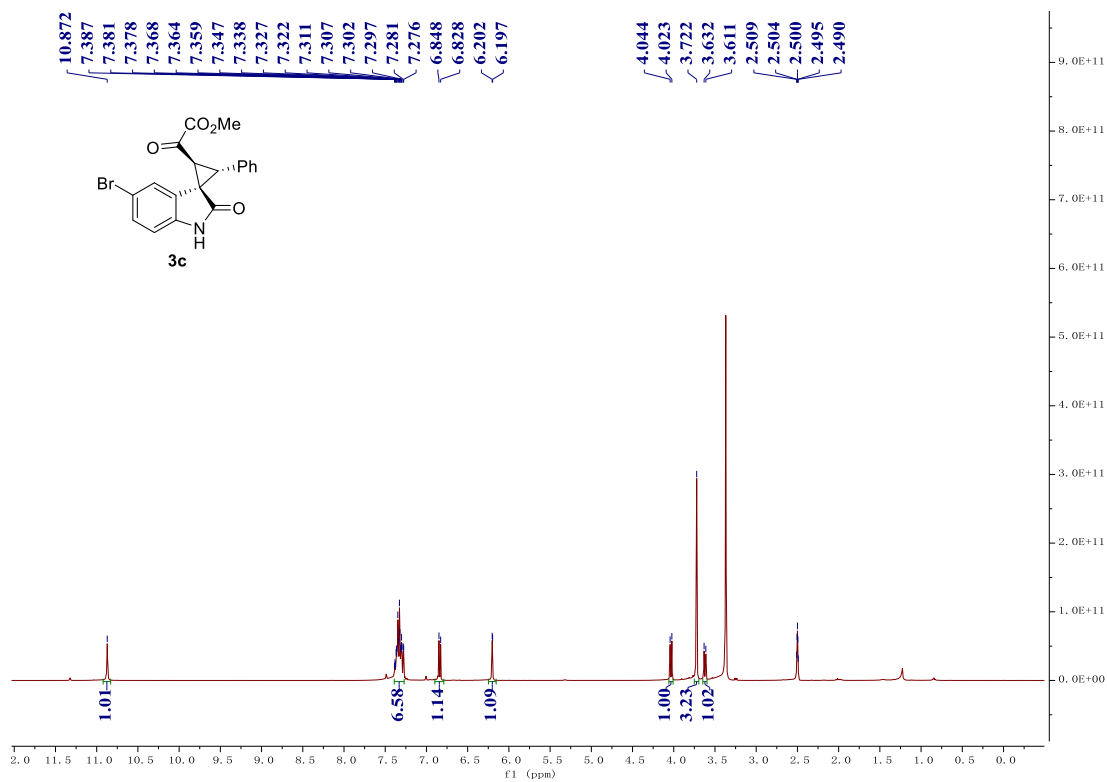

<sup>13</sup>C NMR Spectrum of **3c** (100 MHz, DMSO-d<sup>6</sup>)

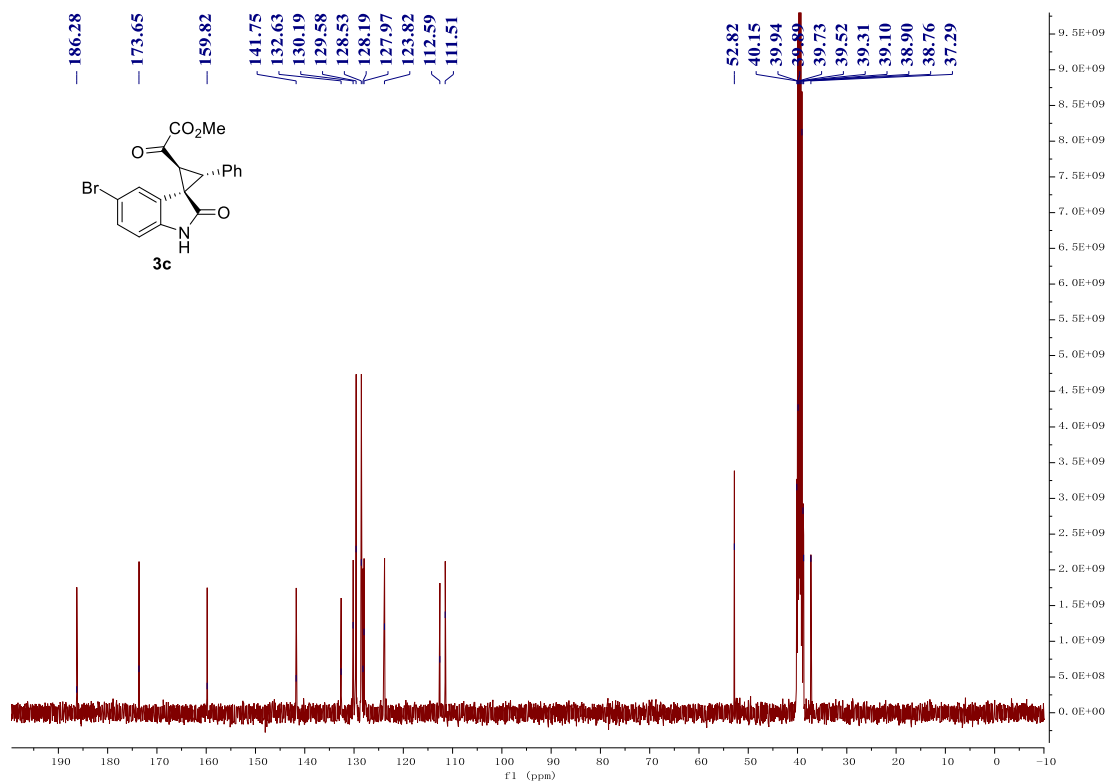

<sup>1</sup>H NMR Spectrum of **3d** (400 MHz, DMSO-d<sup>6</sup>)

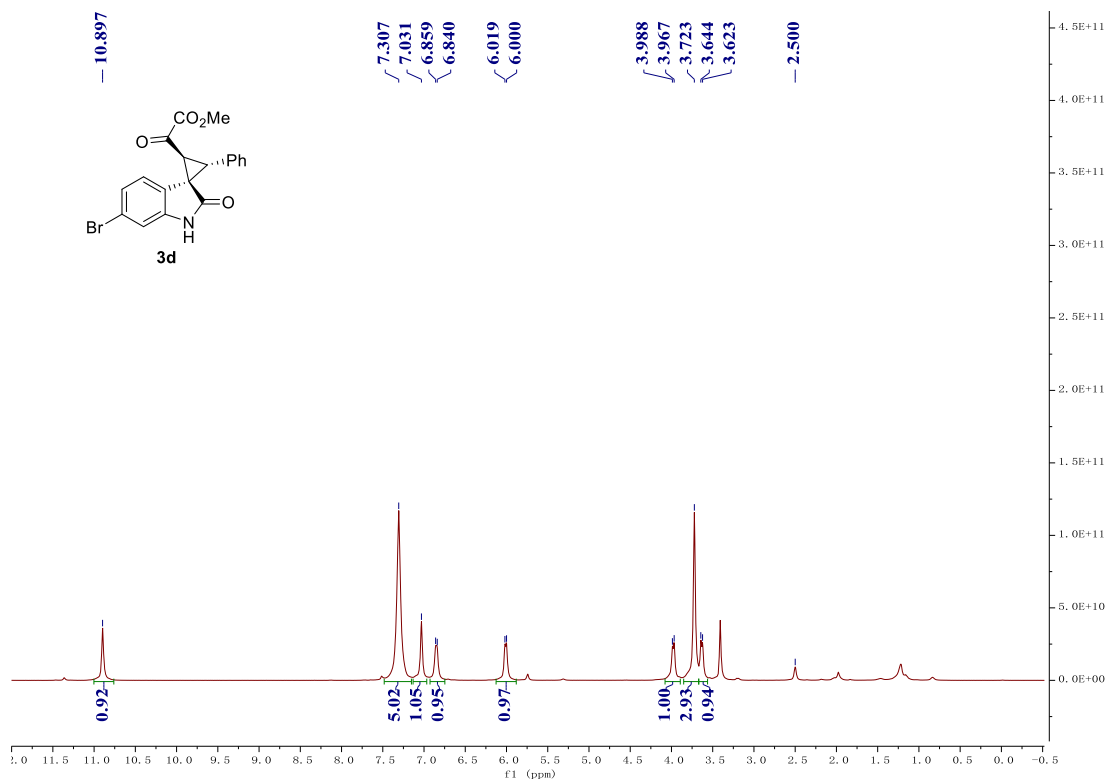

<sup>13</sup>C NMR Spectrum of **3d** (100 MHz, DMSO-d<sup>6</sup>)

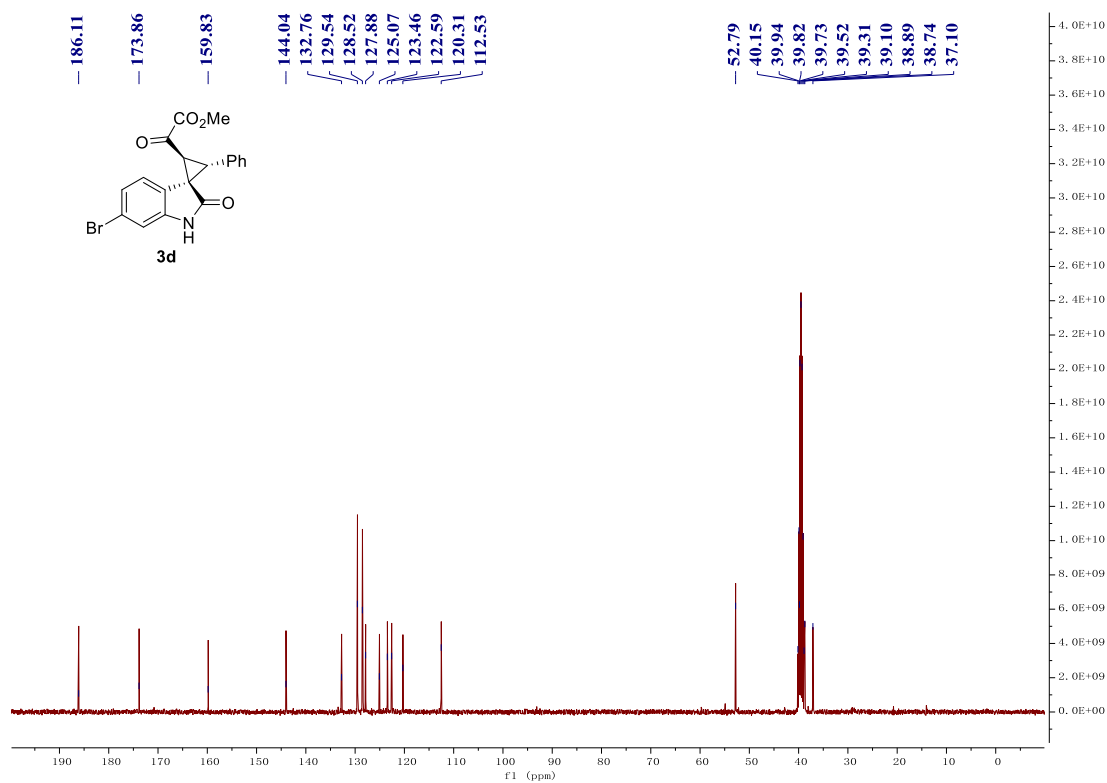

<sup>1</sup>H NMR Spectrum of **3e** (400 MHz, DMSO-d<sup>6</sup>)

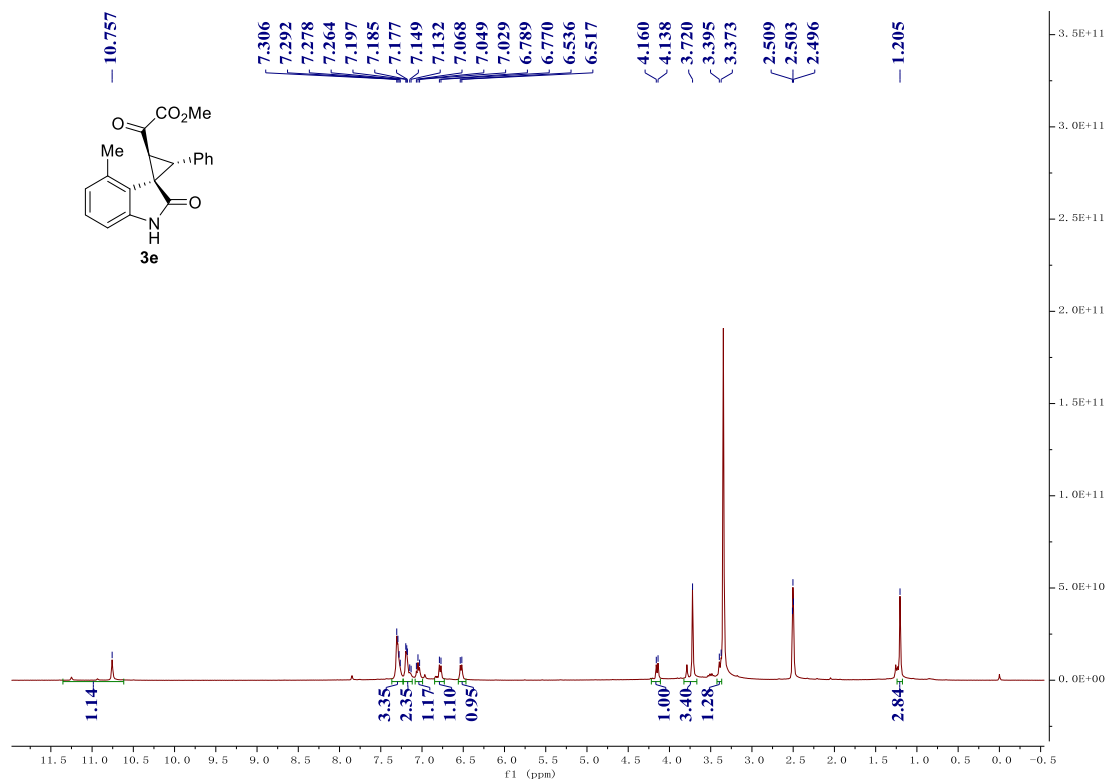

<sup>13</sup>C NMR Spectrum of **3e** (100 MHz, DMSO-d<sup>6</sup>)

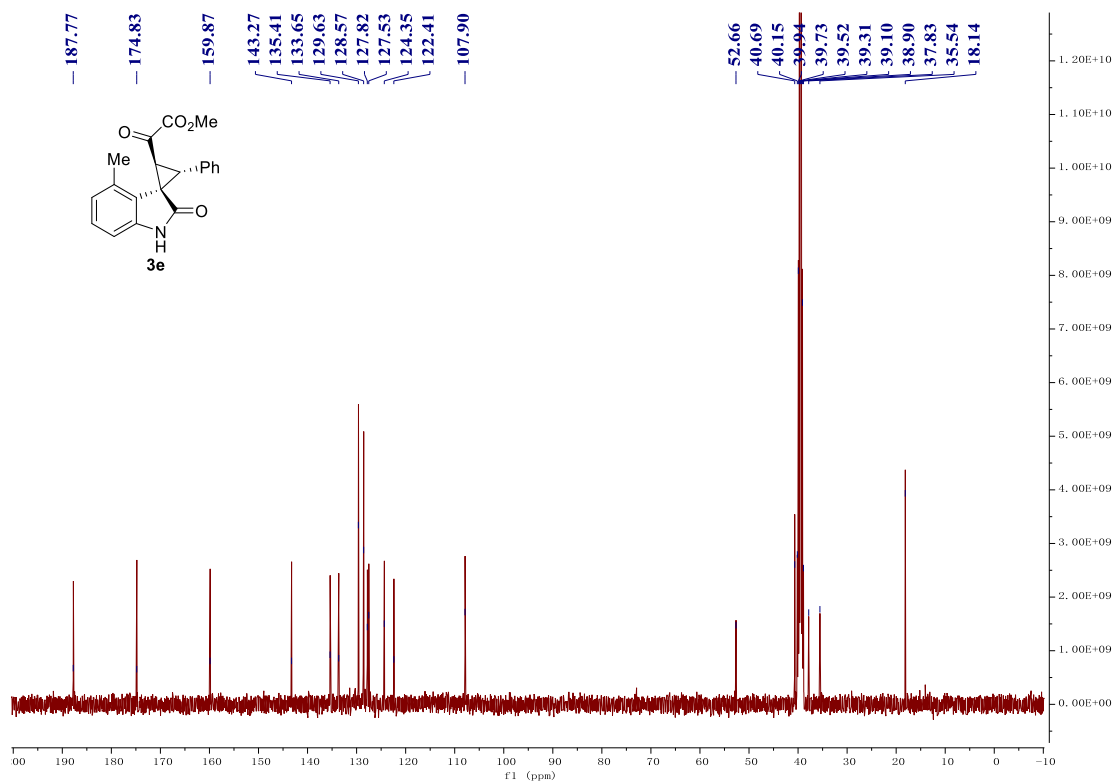

<sup>1</sup>H NMR Spectrum of **3f** (400 MHz, DMSO-d<sup>6</sup>)

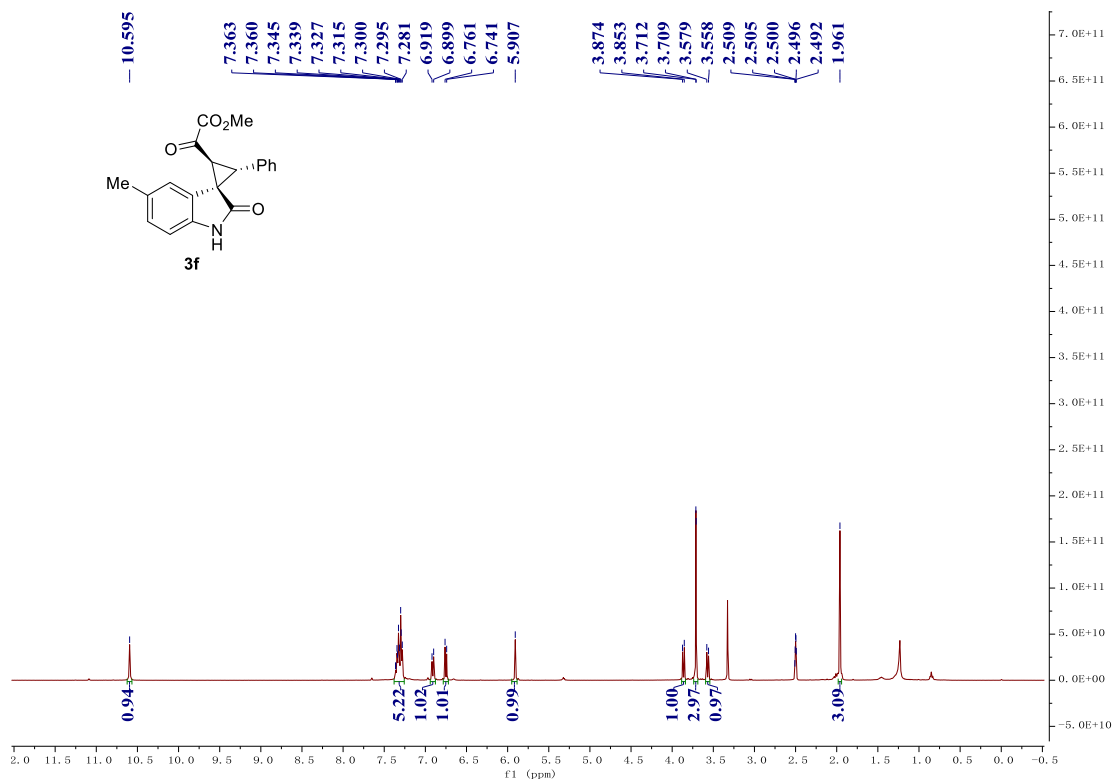

<sup>13</sup>C NMR Spectrum of **3f** (100 MHz, DMSO-d<sup>6</sup>)

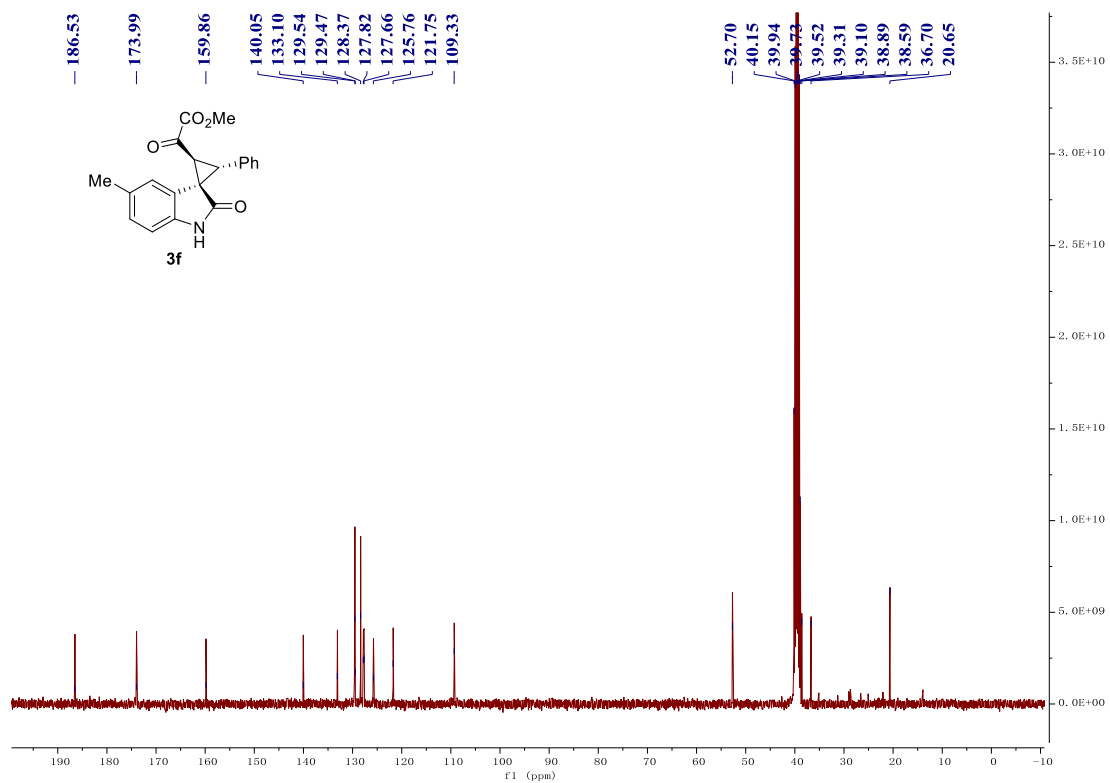

<sup>1</sup>H NMR Spectrum of **3g** (400 MHz, DMSO-d<sup>6</sup>)

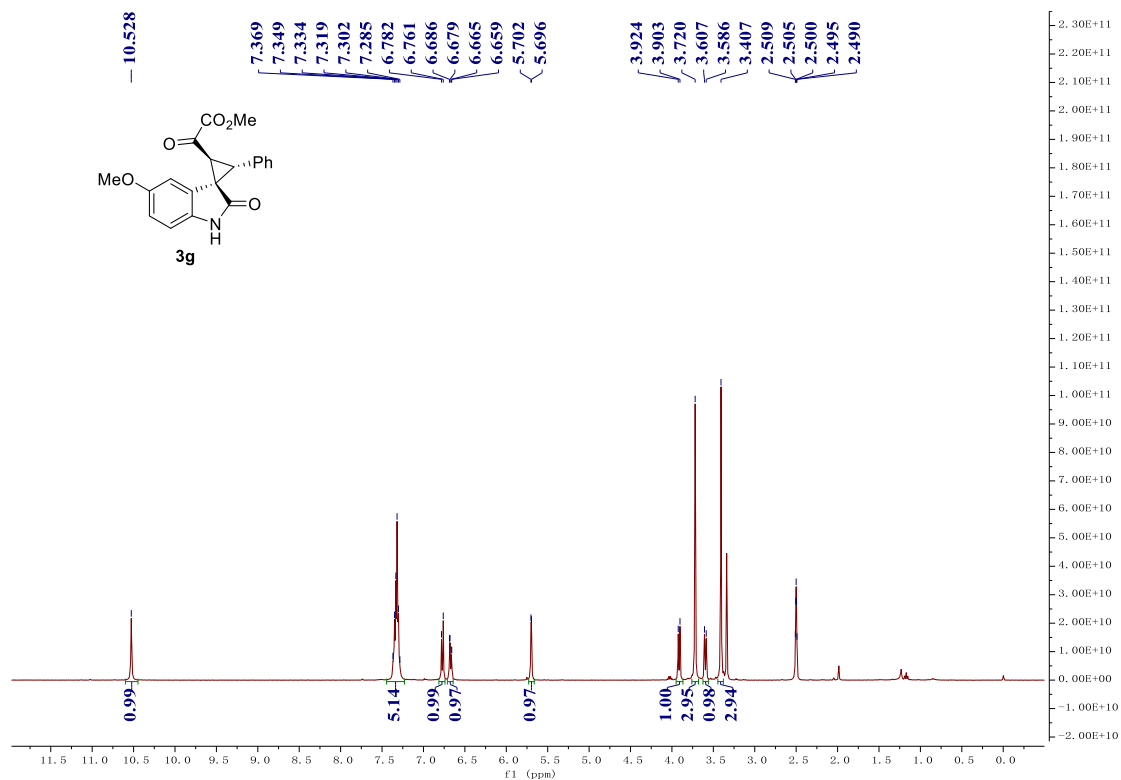

<sup>13</sup>C NMR Spectrum of **3g** (100 MHz, DMSO-d<sup>6</sup>)

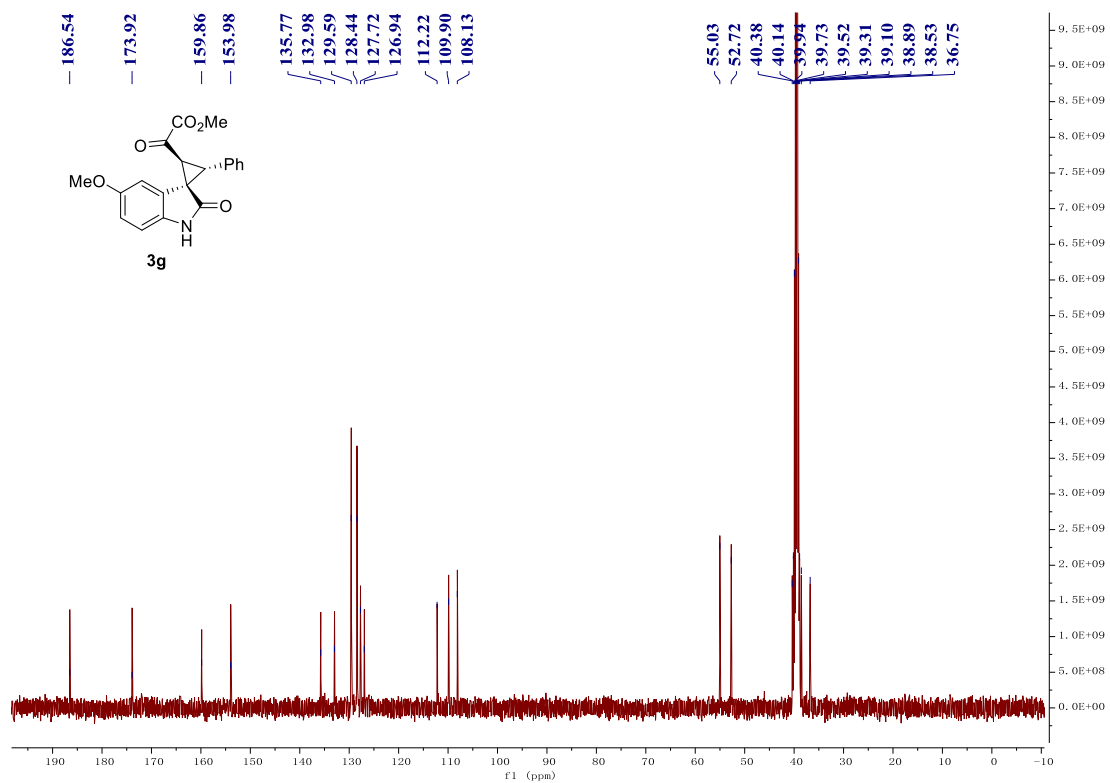

<sup>1</sup>H NMR Spectrum of **3h** (400 MHz, DMSO-d<sup>6</sup>)

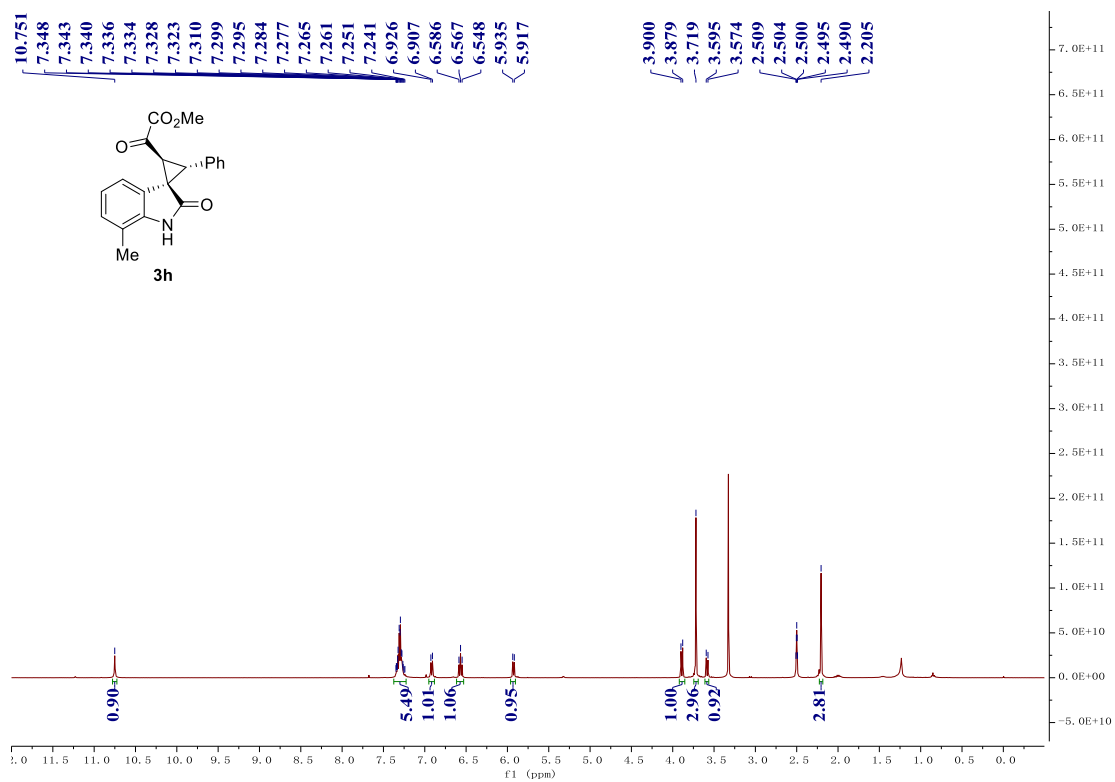

<sup>13</sup>C NMR Spectrum of **3h** (100 MHz, DMSO-d<sup>6</sup>)

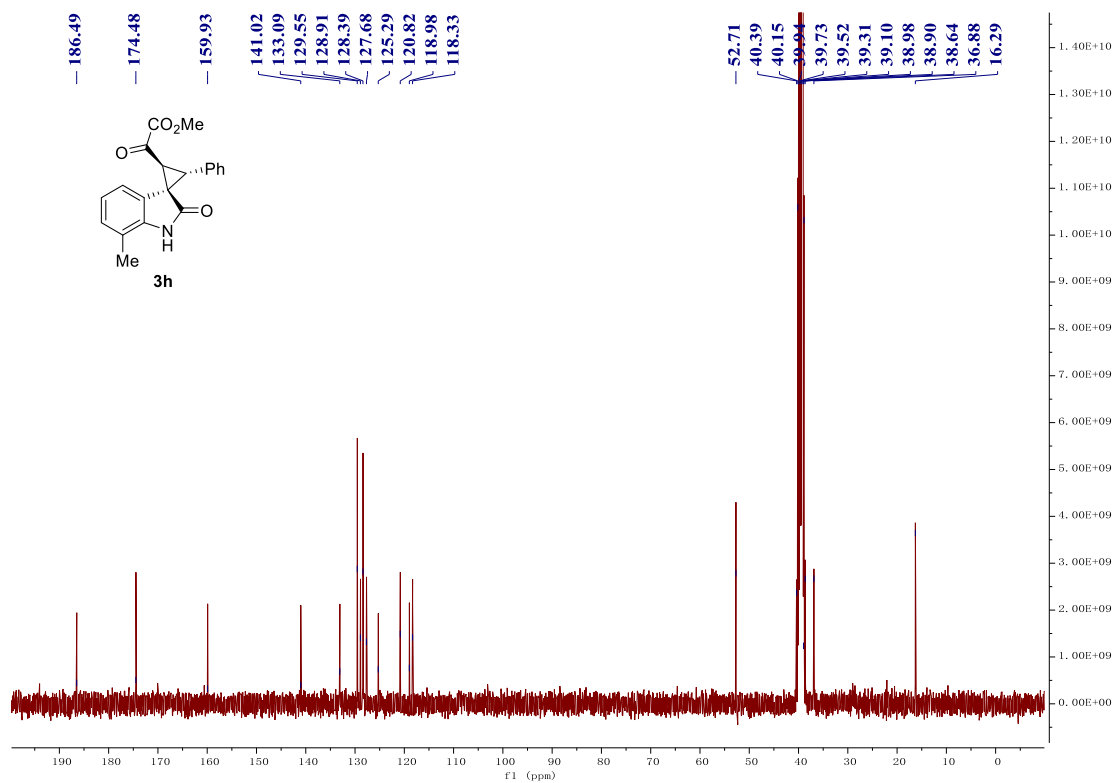

<sup>1</sup>H NMR Spectrum of **3i** (400 MHz, DMSO-d<sup>6</sup>)

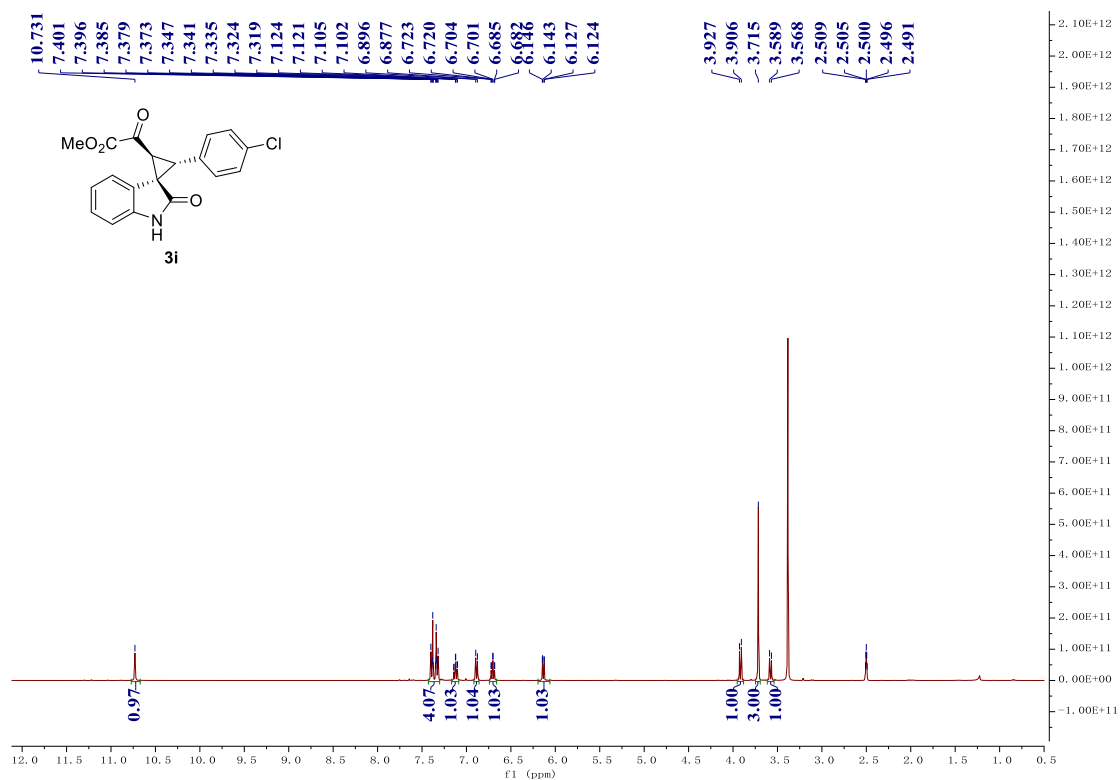

<sup>13</sup>C NMR Spectrum of **3i** (100 MHz, DMSO-d<sup>6</sup>)

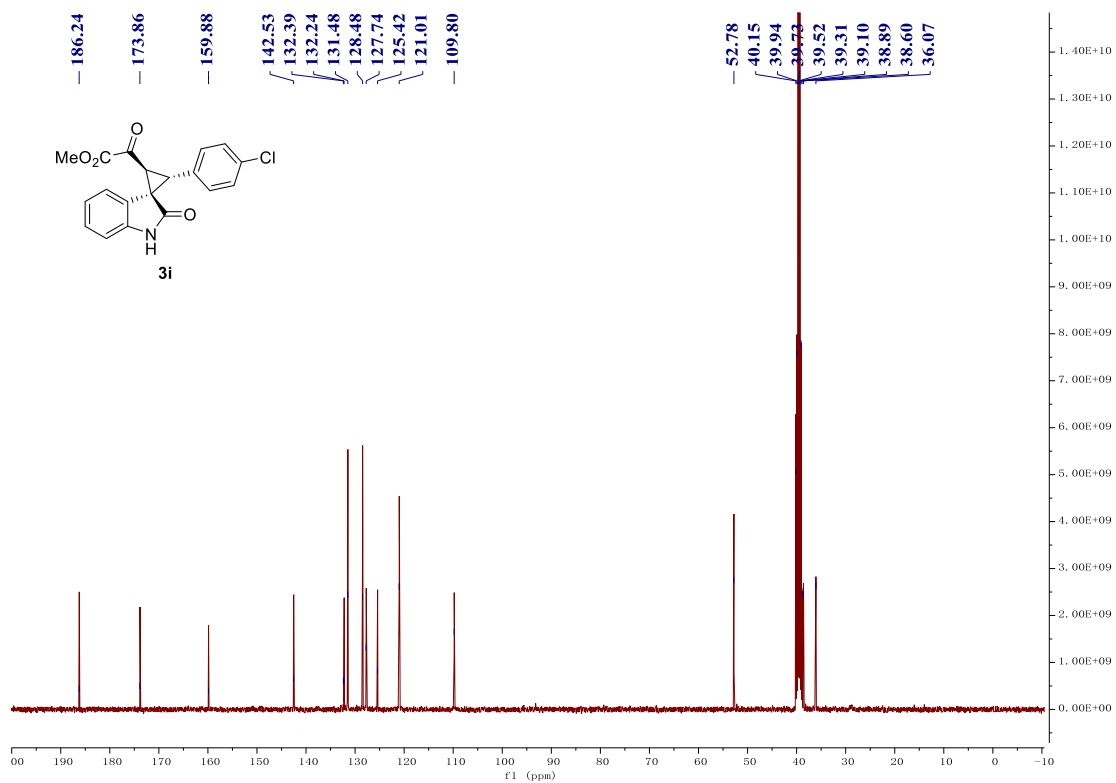



<sup>1</sup>H NMR Spectrum of **3j** (400 MHz, DMSO-d<sup>6</sup>)

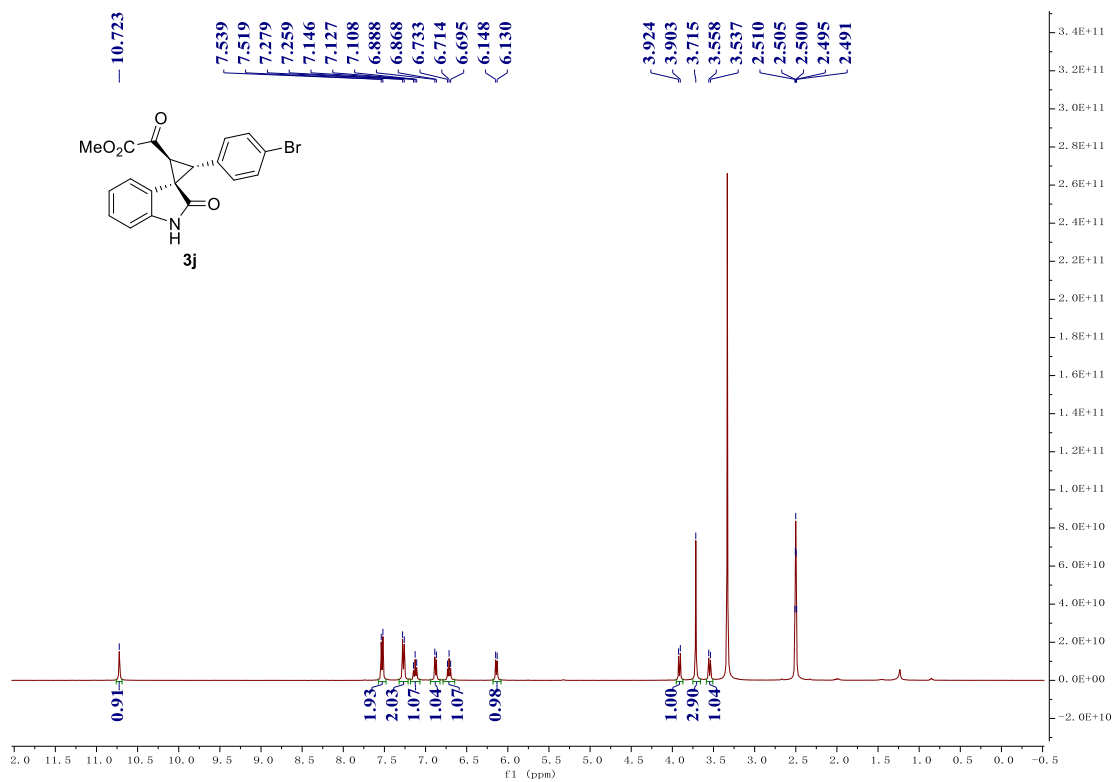

<sup>13</sup>C NMR Spectrum of **3j** (100 MHz, DMSO-d<sup>6</sup>)

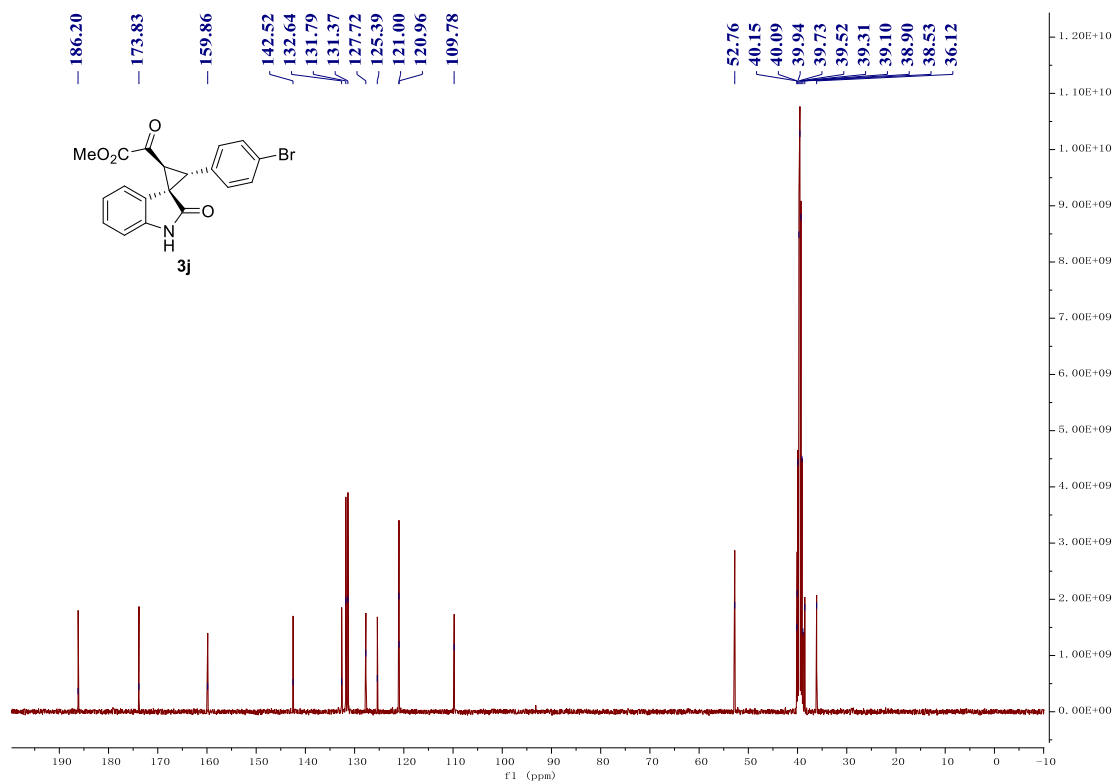

<sup>1</sup>H NMR Spectrum of **3k** (400 MHz, DMSO-d<sup>6</sup>)

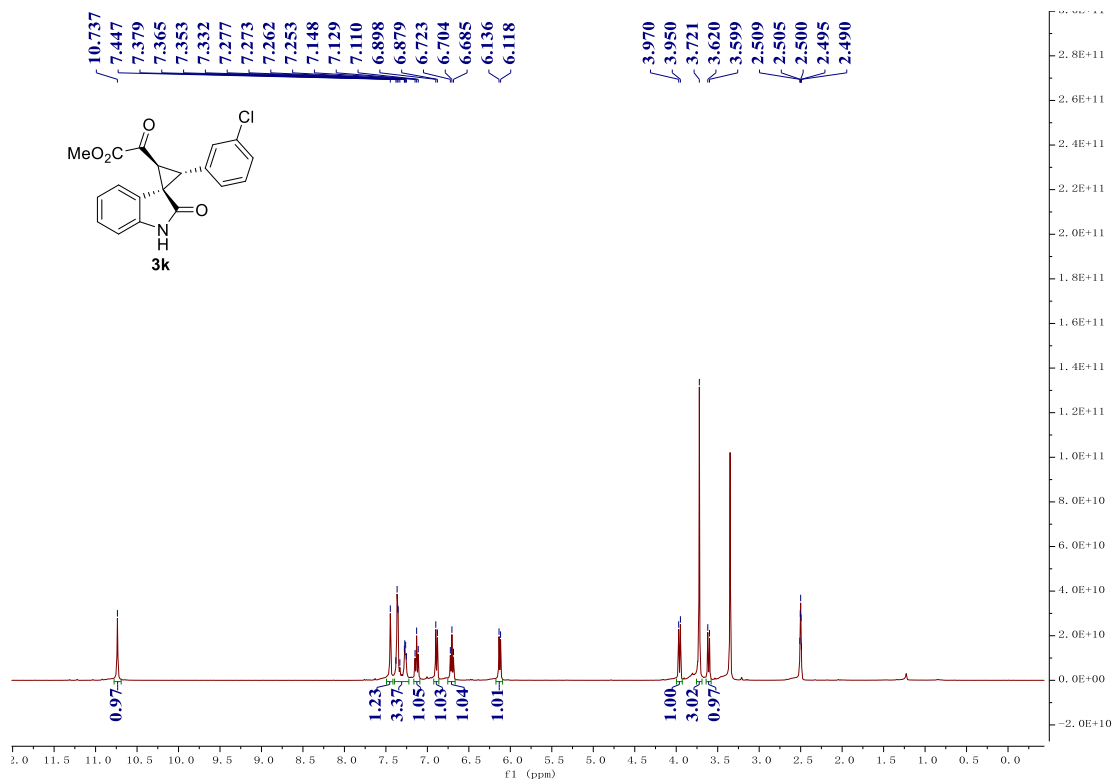

<sup>13</sup>C NMR Spectrum of **3k** (100 MHz, DMSO-d<sup>6</sup>)

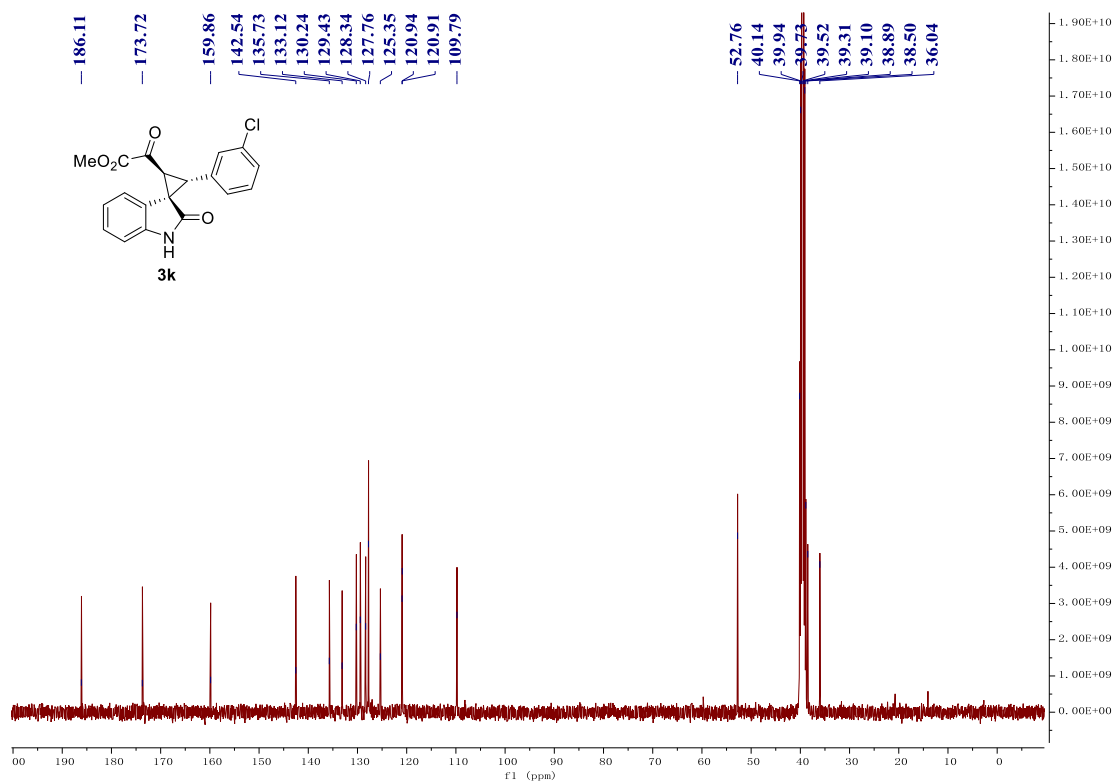

<sup>1</sup>H NMR Spectrum of **31** (400 MHz, DMSO-d<sup>6</sup>)

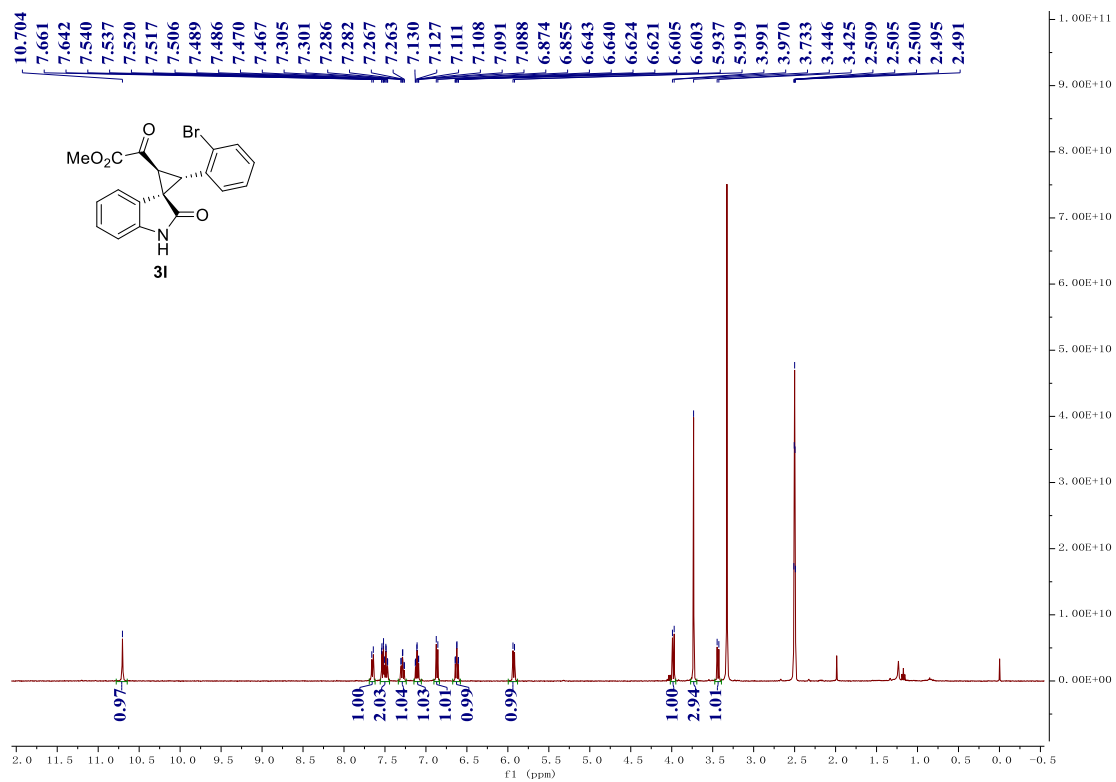

<sup>13</sup>C NMR Spectrum of **31** (100 MHz, DMSO-d<sup>6</sup>)

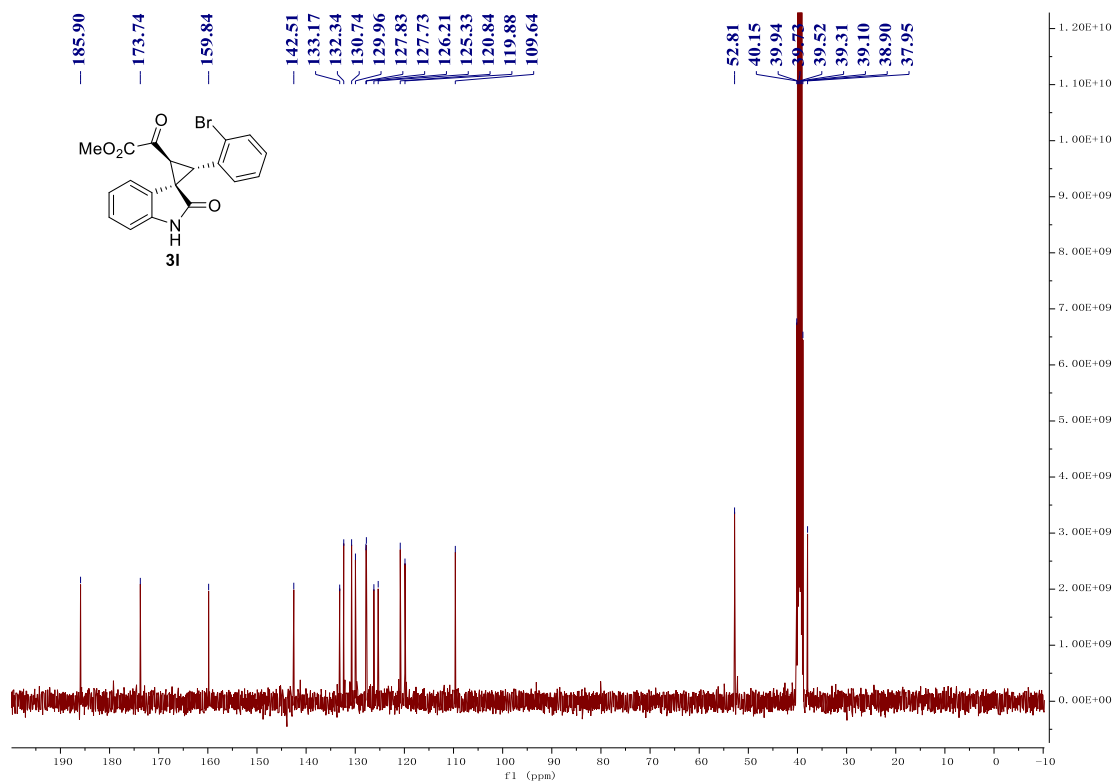

<sup>1</sup>H NMR Spectrum of **3m** (400 MHz, DMSO-d<sup>6</sup>)

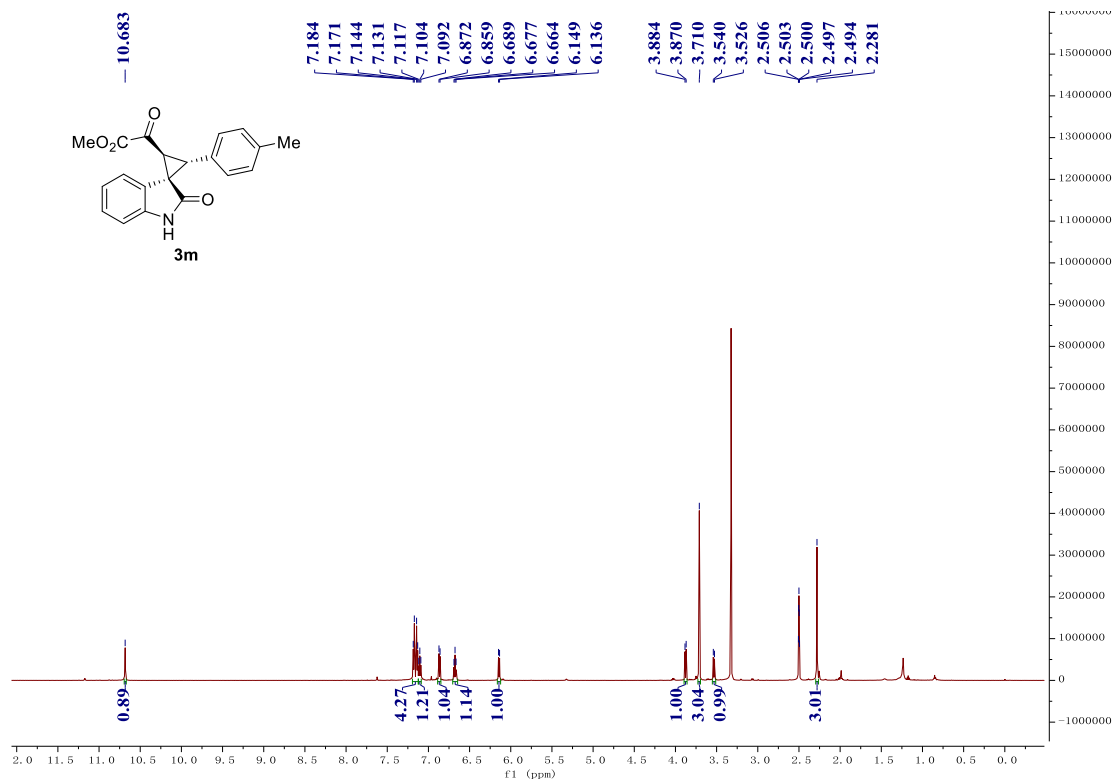

<sup>13</sup>C NMR Spectrum of **3m** (100 MHz, DMSO-d<sup>6</sup>)

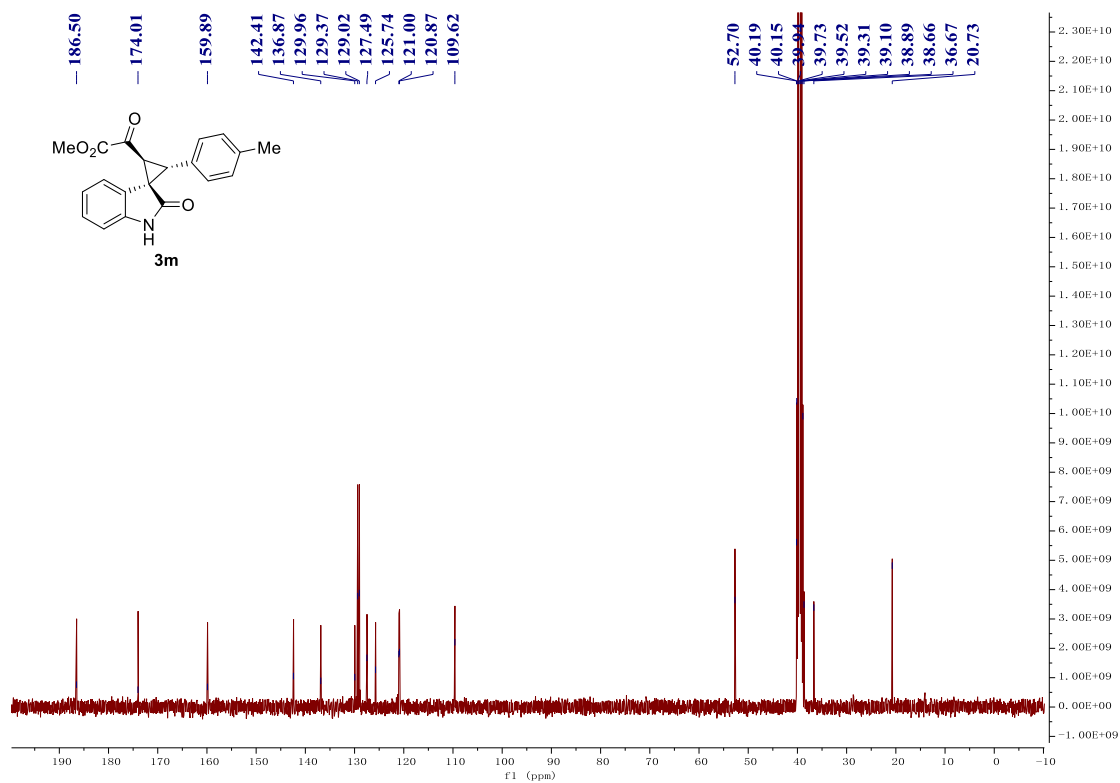

<sup>1</sup>H NMR Spectrum of **3n** (400 MHz, DMSO-d<sup>6</sup>)

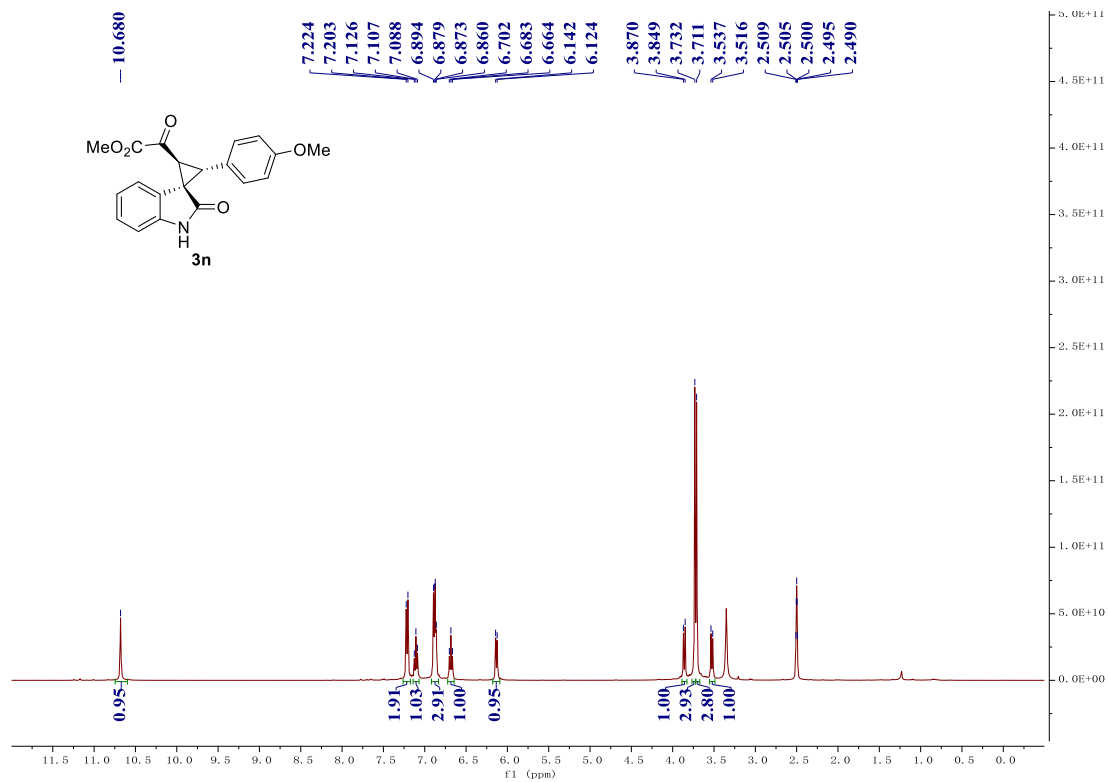

<sup>13</sup>C NMR Spectrum of **3n** (100 MHz, DMSO-d<sup>6</sup>)

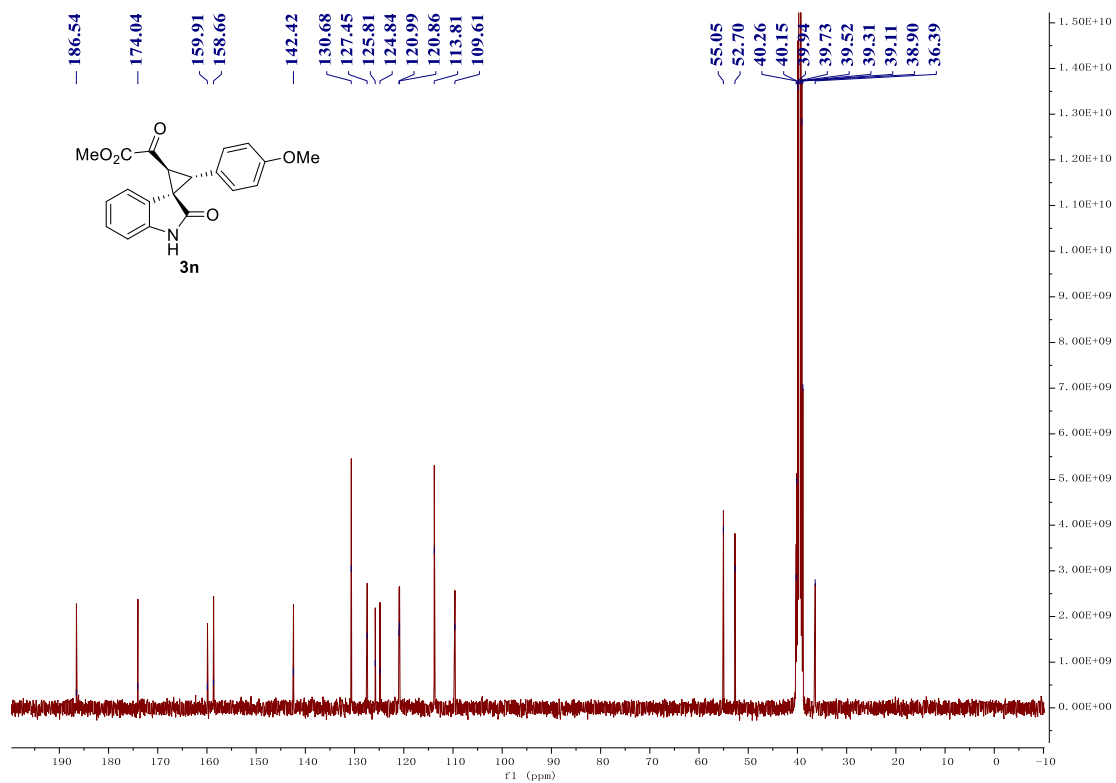

<sup>1</sup>H NMR Spectrum of **3o** (400 MHz, DMSO-d<sup>6</sup>)

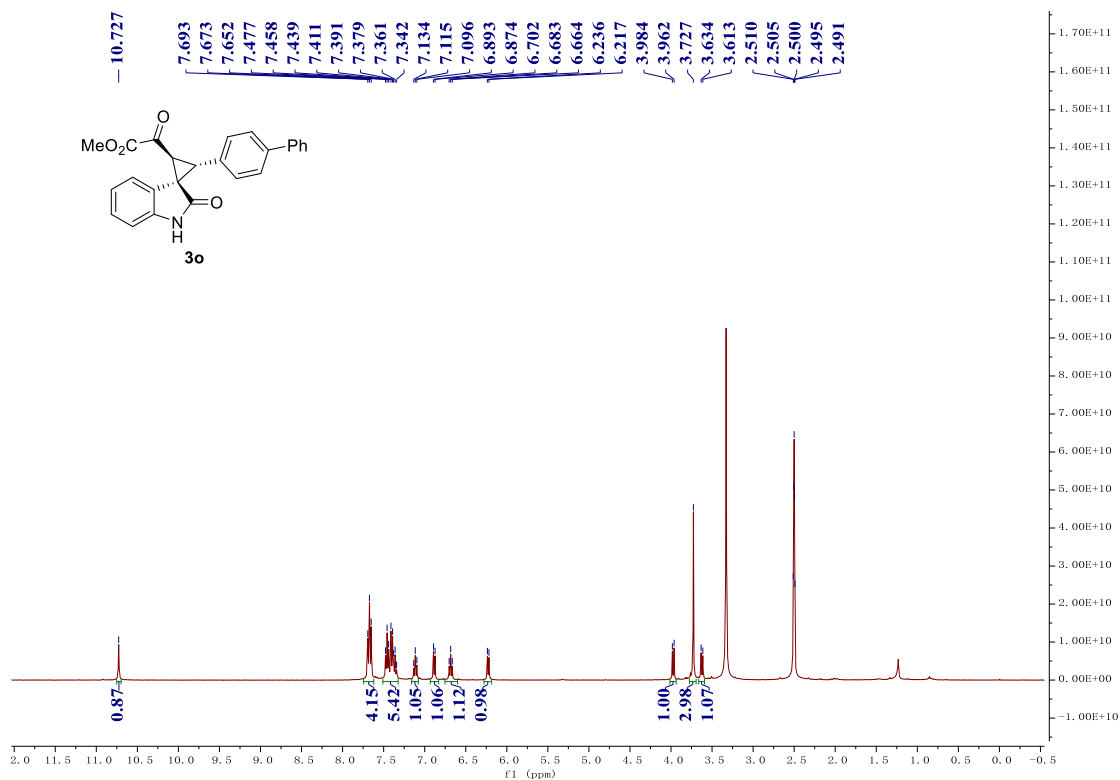

<sup>13</sup>C NMR Spectrum of **3o** (100 MHz, DMSO-d<sup>6</sup>)

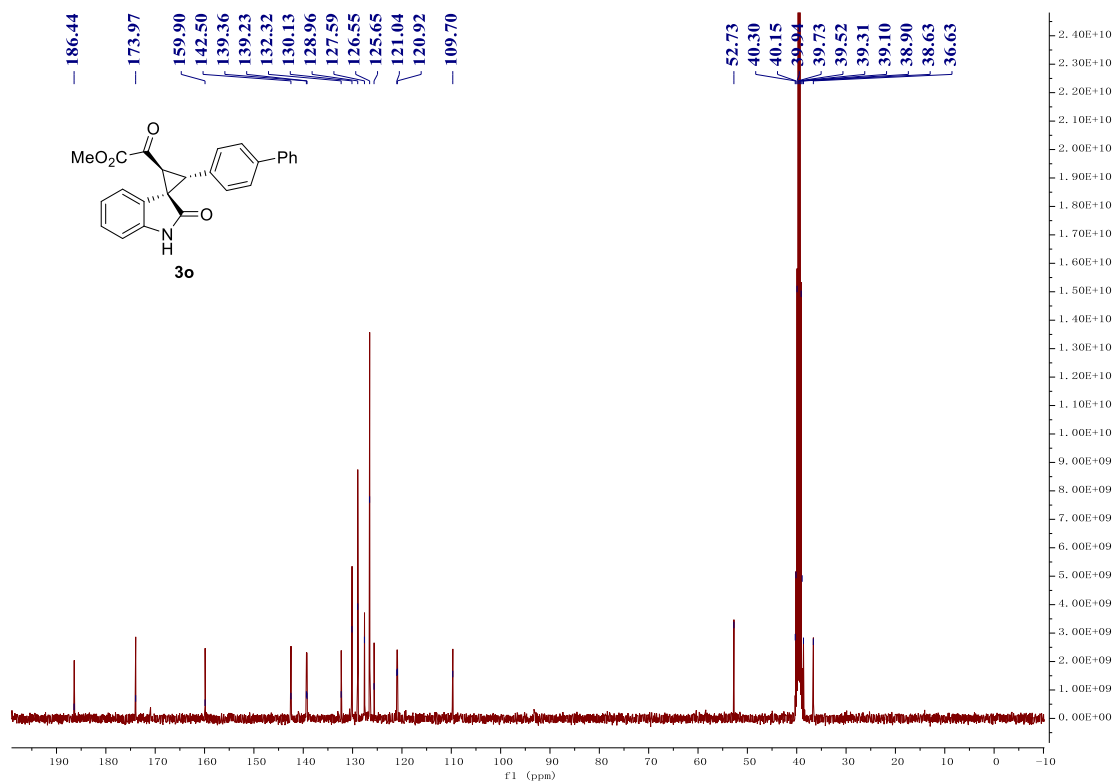

<sup>1</sup>H NMR Spectrum of **3p** (400 MHz, CD<sub>3</sub>CN)

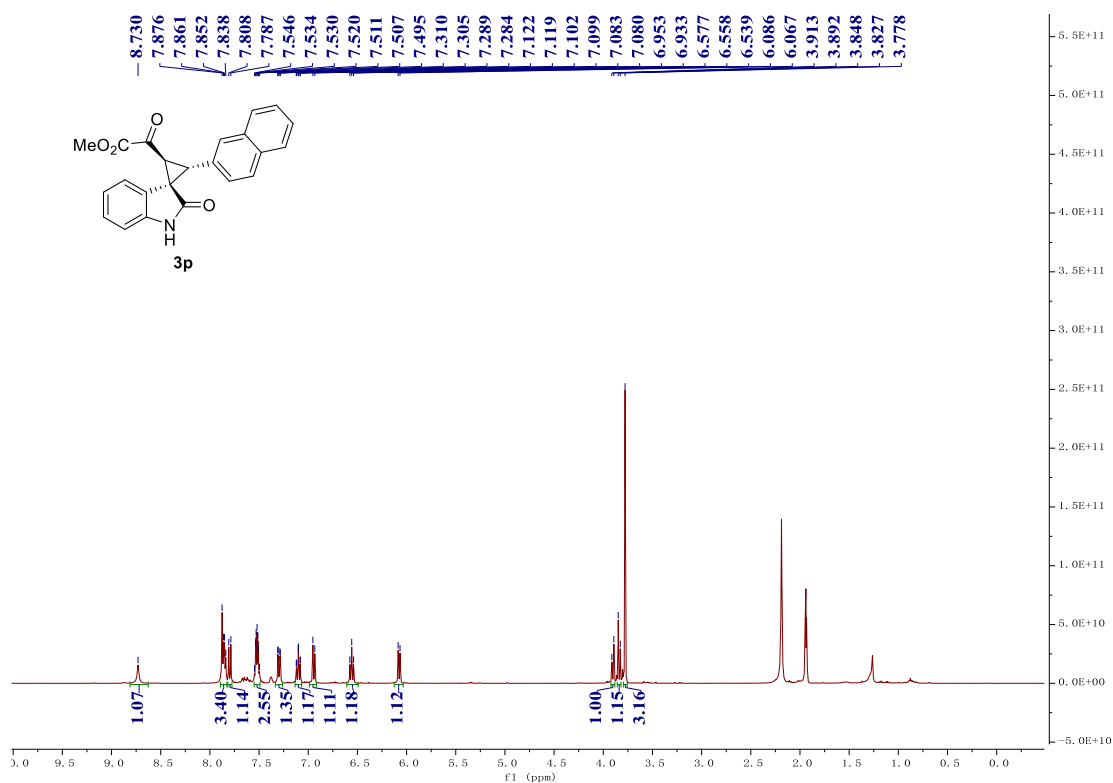

<sup>13</sup>C NMR Spectrum of **3p** (100 MHz, CD<sub>3</sub>CN)

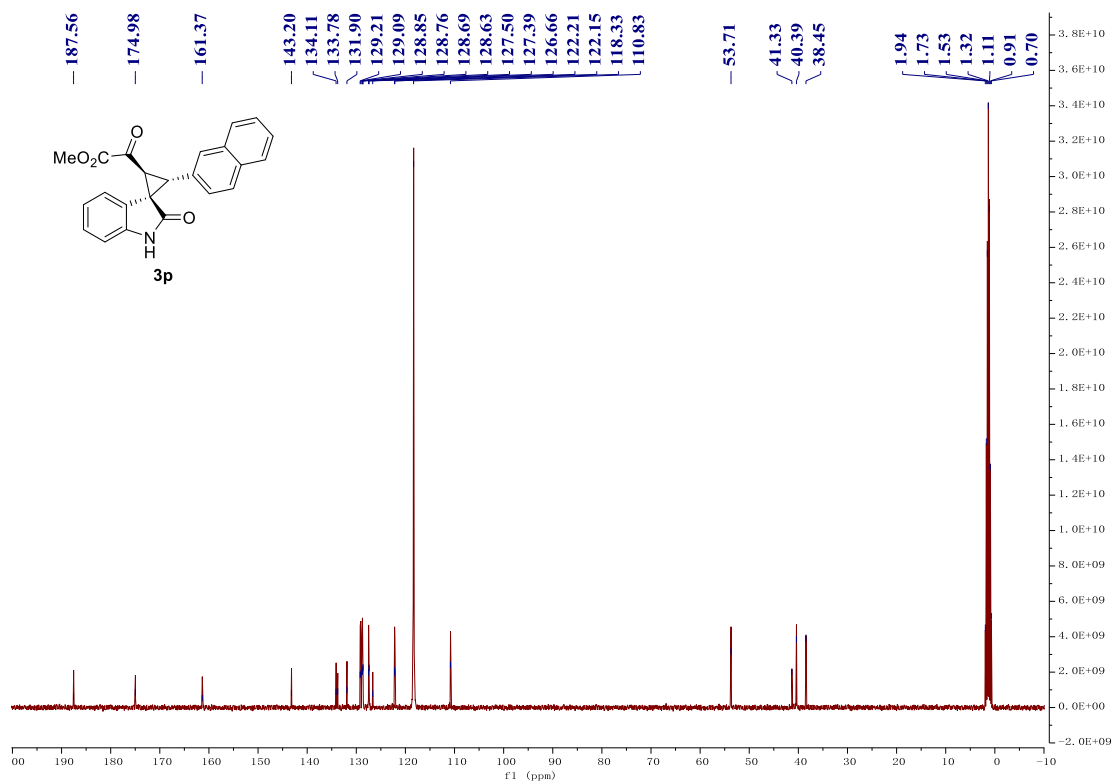

<sup>1</sup>H NMR Spectrum of **3q** (400 MHz, DMSO-d<sup>6</sup>)

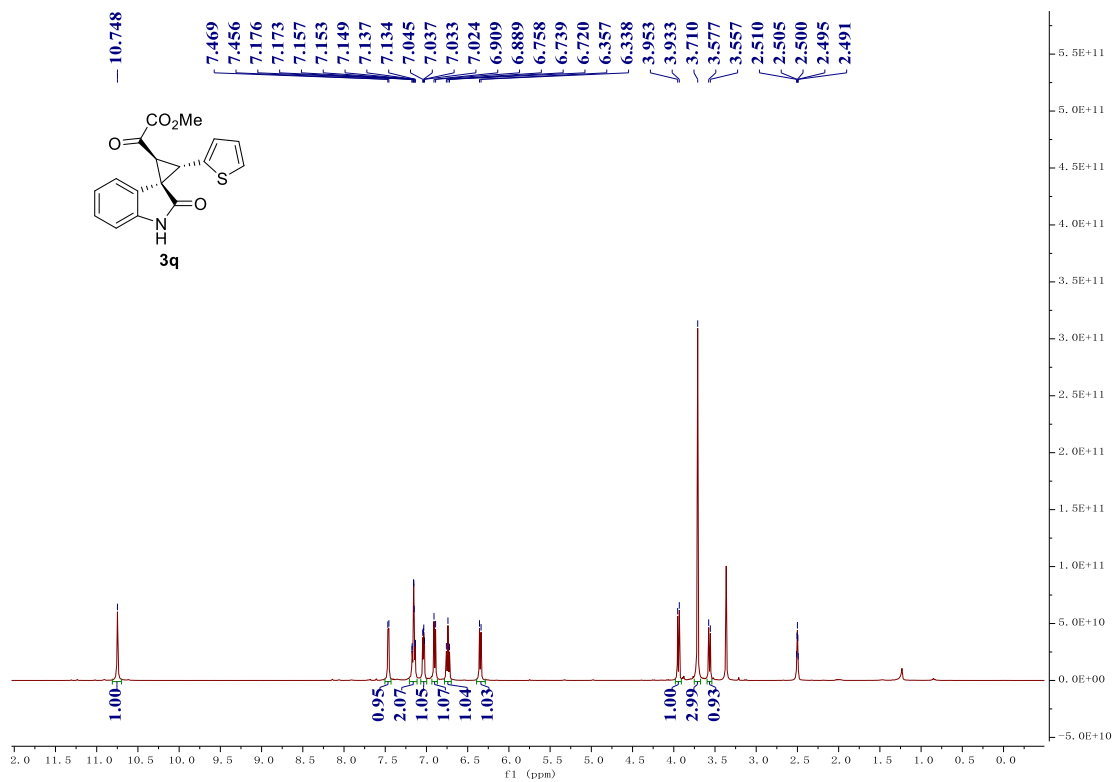

<sup>13</sup>C NMR Spectrum of **3q** (100 MHz, DMSO-d<sup>6</sup>)

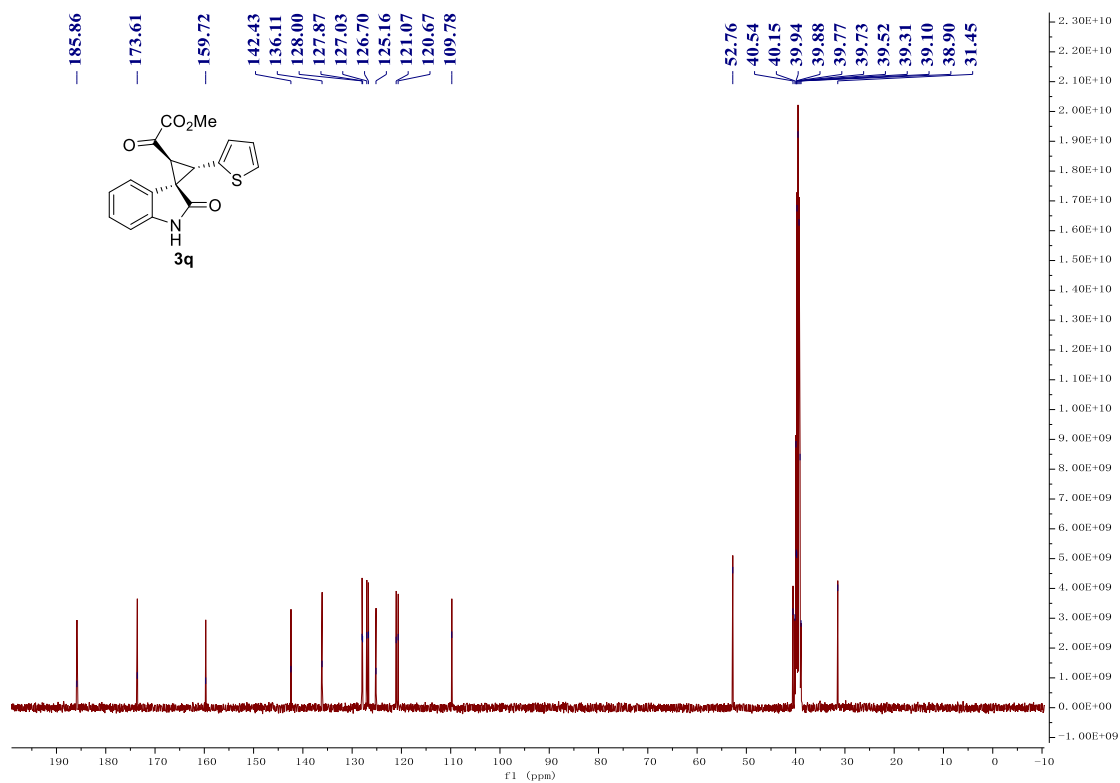



<sup>1</sup>H NMR Spectrum of **3r** (400 MHz, DMSO-d<sup>6</sup>)

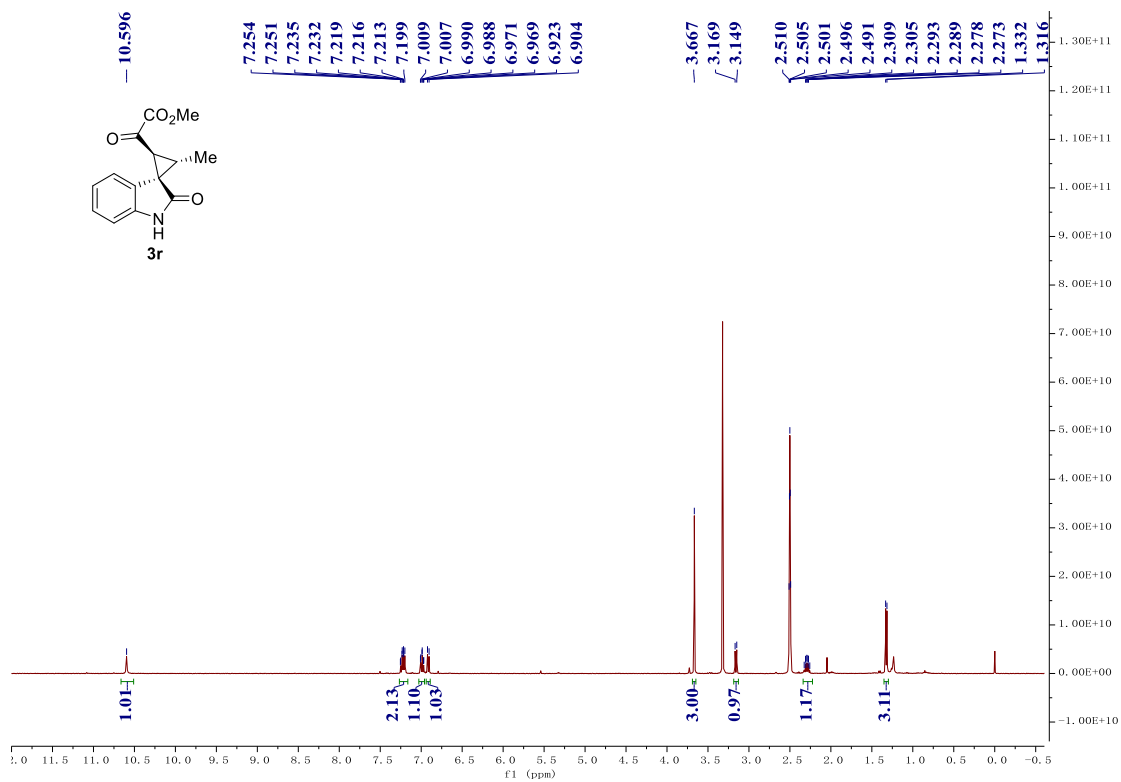

<sup>13</sup>C NMR Spectrum of **3r** (100 MHz, DMSO-d<sup>6</sup>)

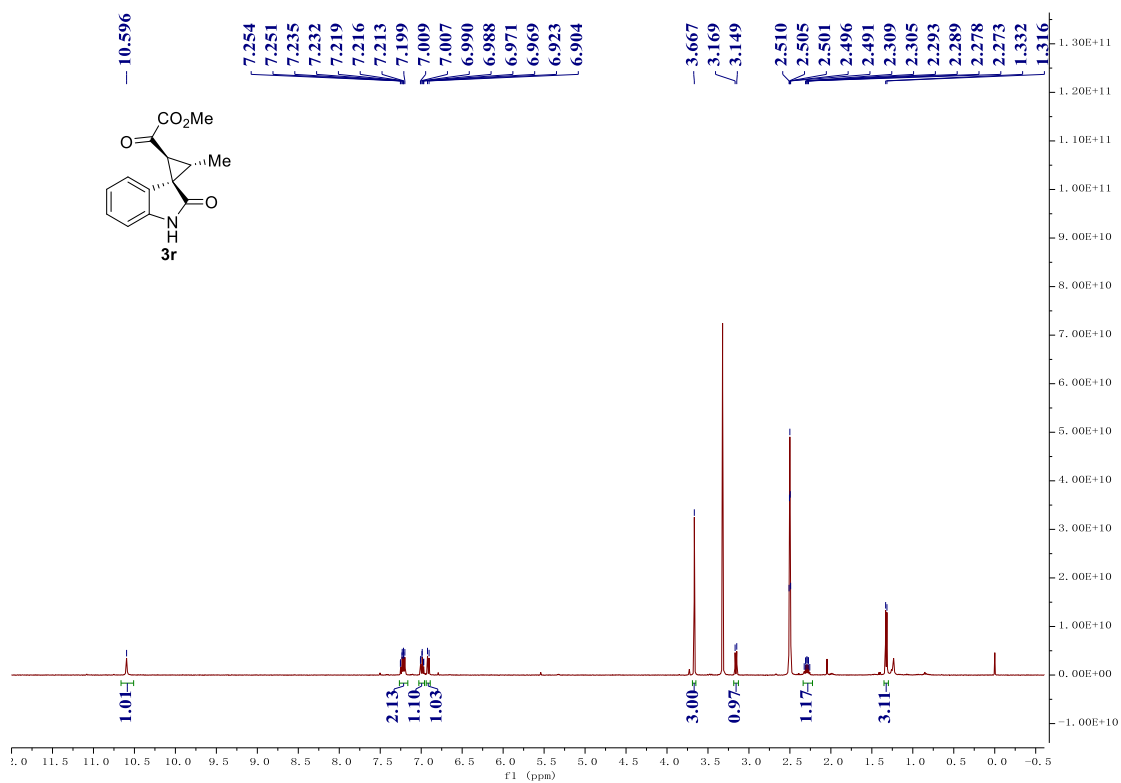

<sup>1</sup>H NMR Spectrum of **4a** (600 MHz, DMSO-d<sup>6</sup>)

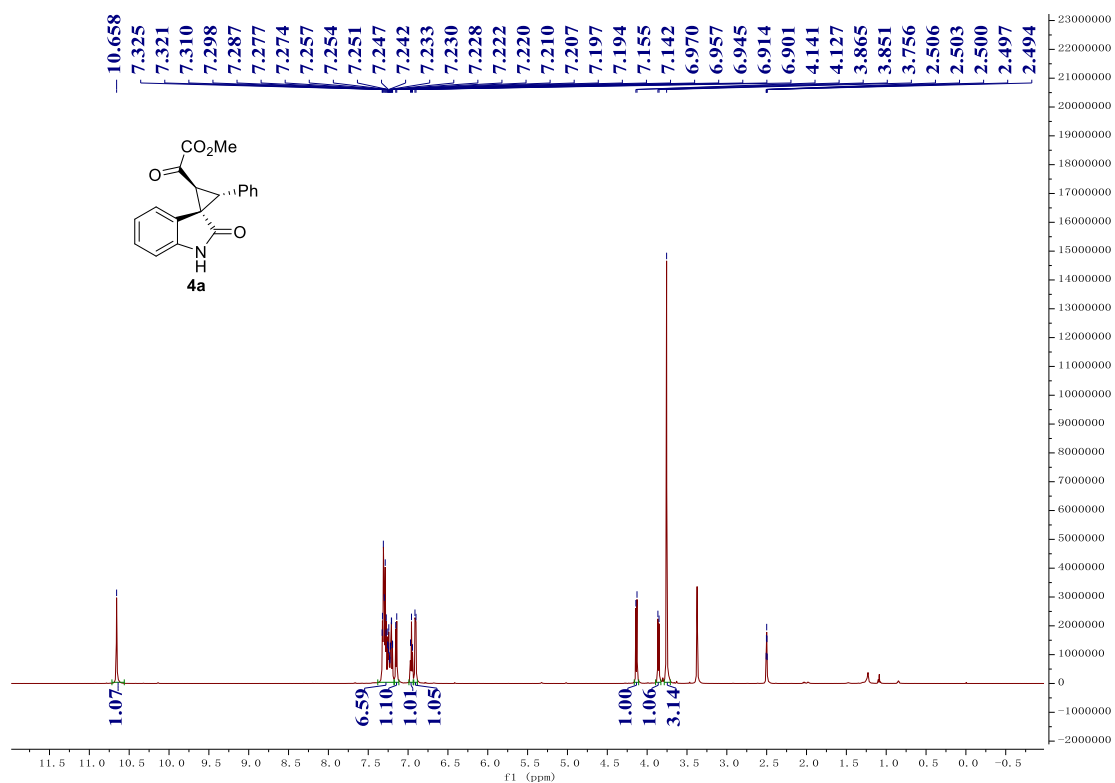

<sup>1</sup>H NMR Spectrum of **6a** (600 MHz, DMSO-d<sup>6</sup>)

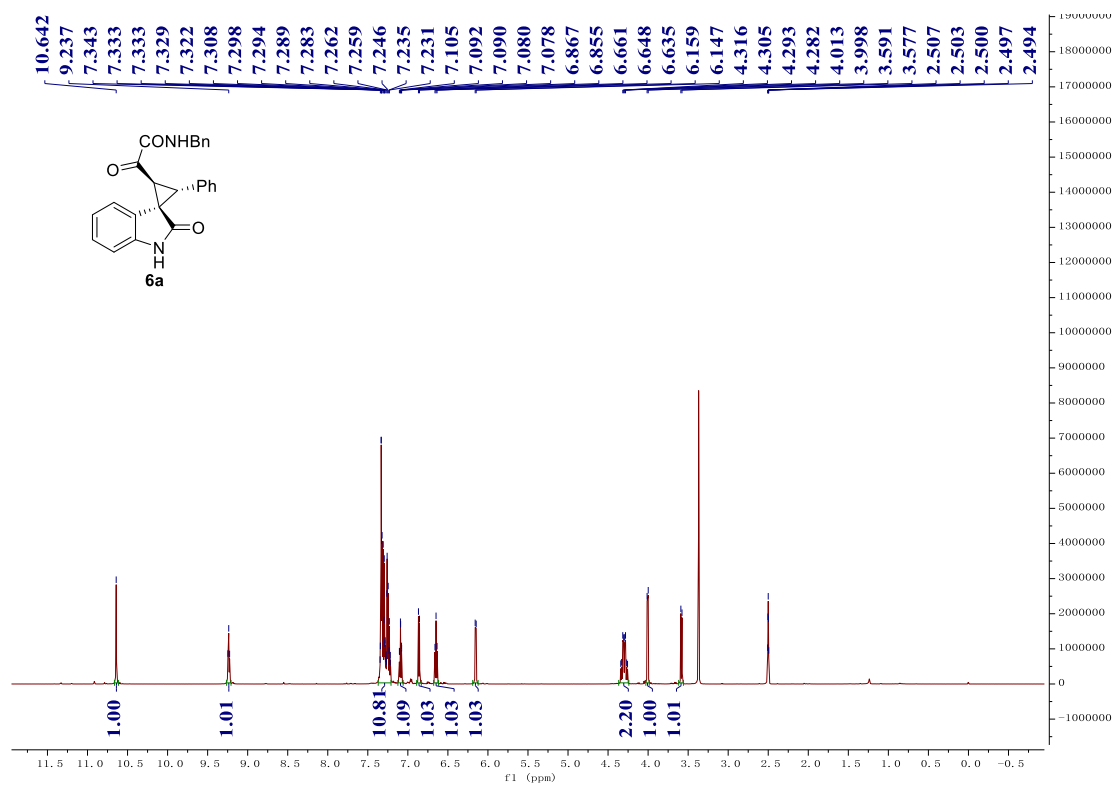

<sup>13</sup>C NMR Spectrum of **6a** (150 MHz, DMSO-d<sub>6</sub>)

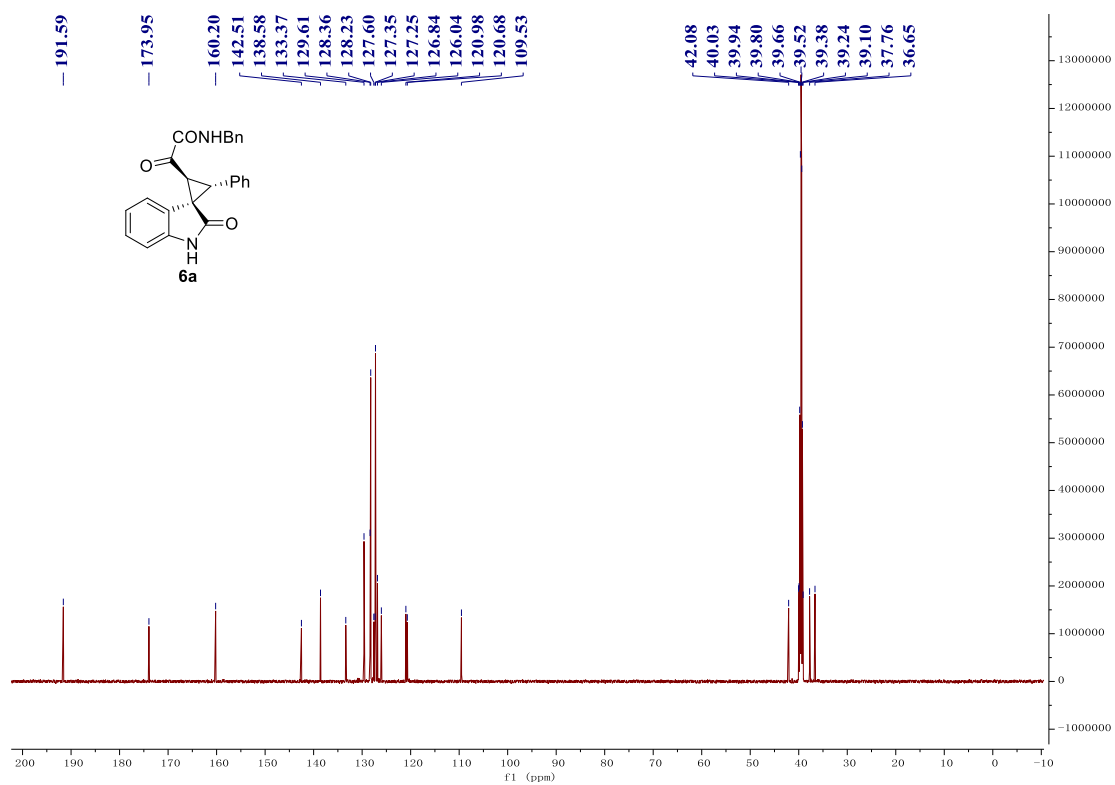

<sup>1</sup>H NMR Spectrum of **6b** (600 MHz, CDCl<sub>3</sub>)

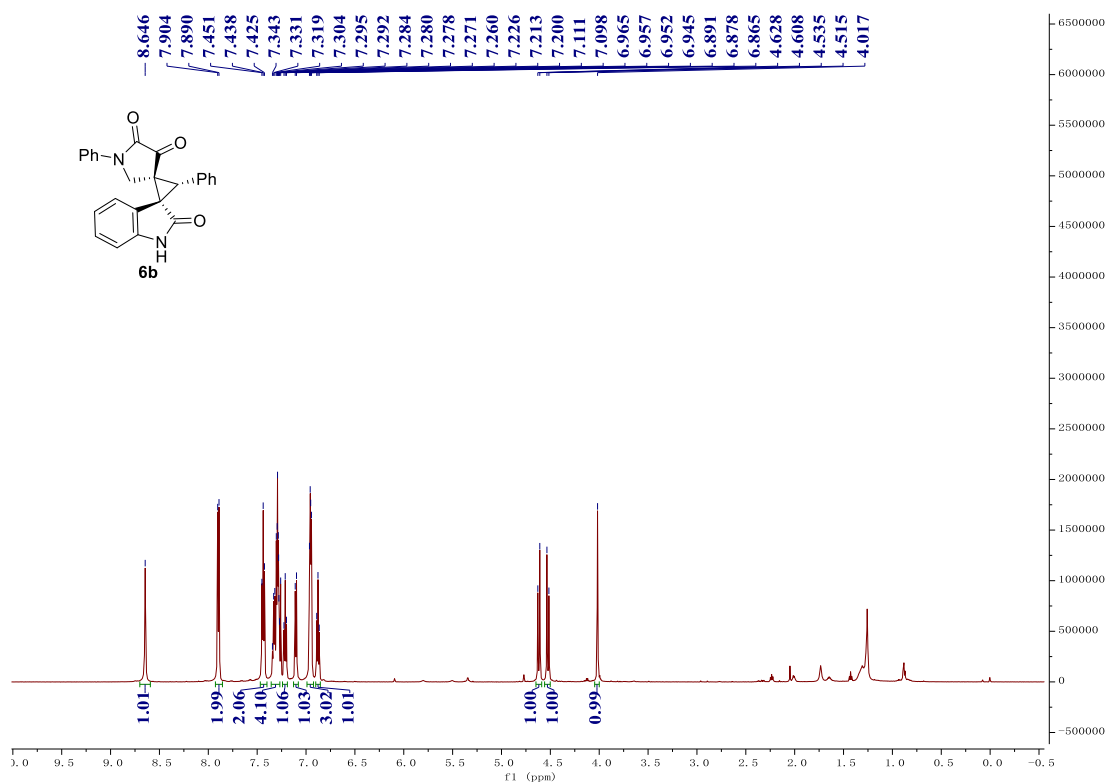

<sup>13</sup>C NMR Spectrum of **6b** (150 MHz, CDCl<sub>3</sub>)

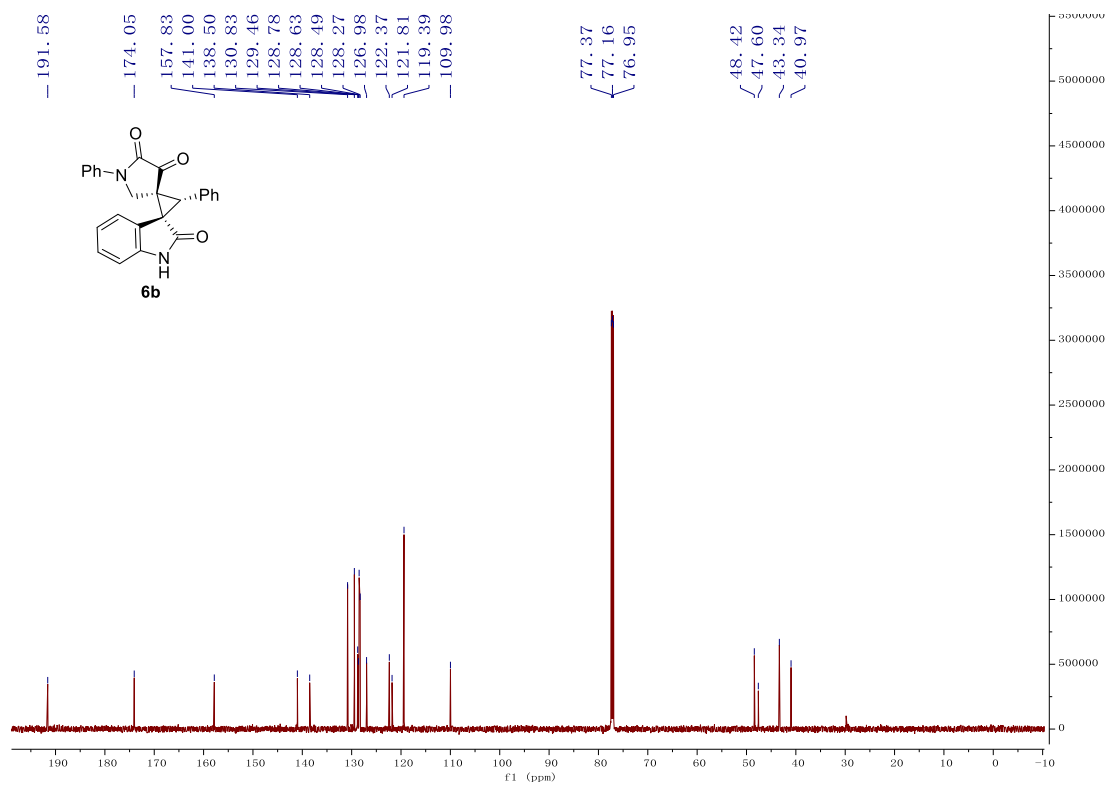

<sup>1</sup>H NMR Spectrum of **6c** (600 MHz, CDCl<sub>3</sub>)

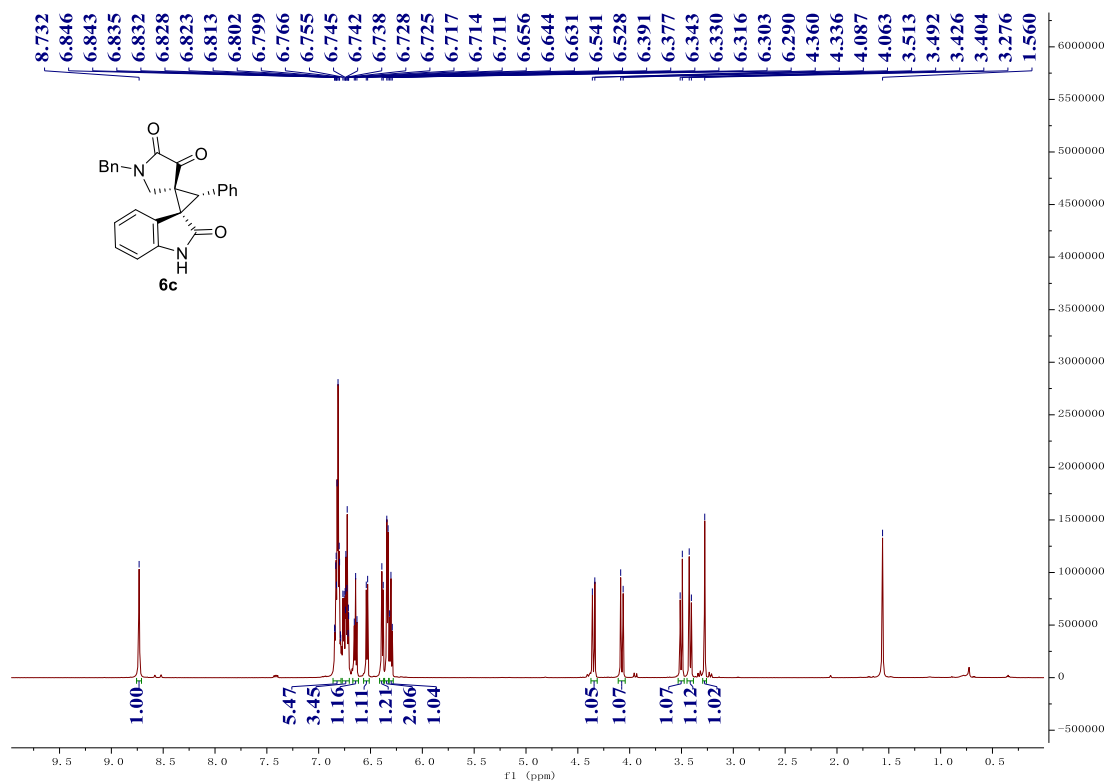

<sup>13</sup>C NMR Spectrum of **6c** (150 MHz, CDCl<sub>3</sub>)

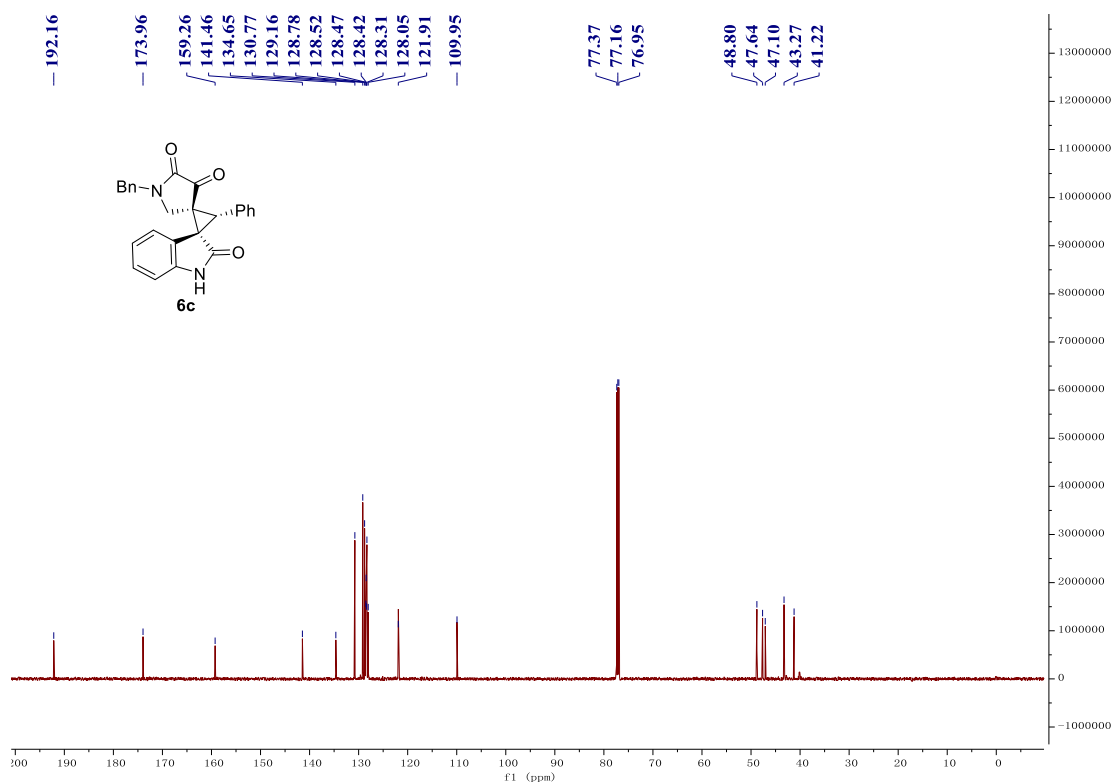

<sup>1</sup>H NMR Spectrum of **8a** (400 MHz, CDCl<sub>3</sub>)

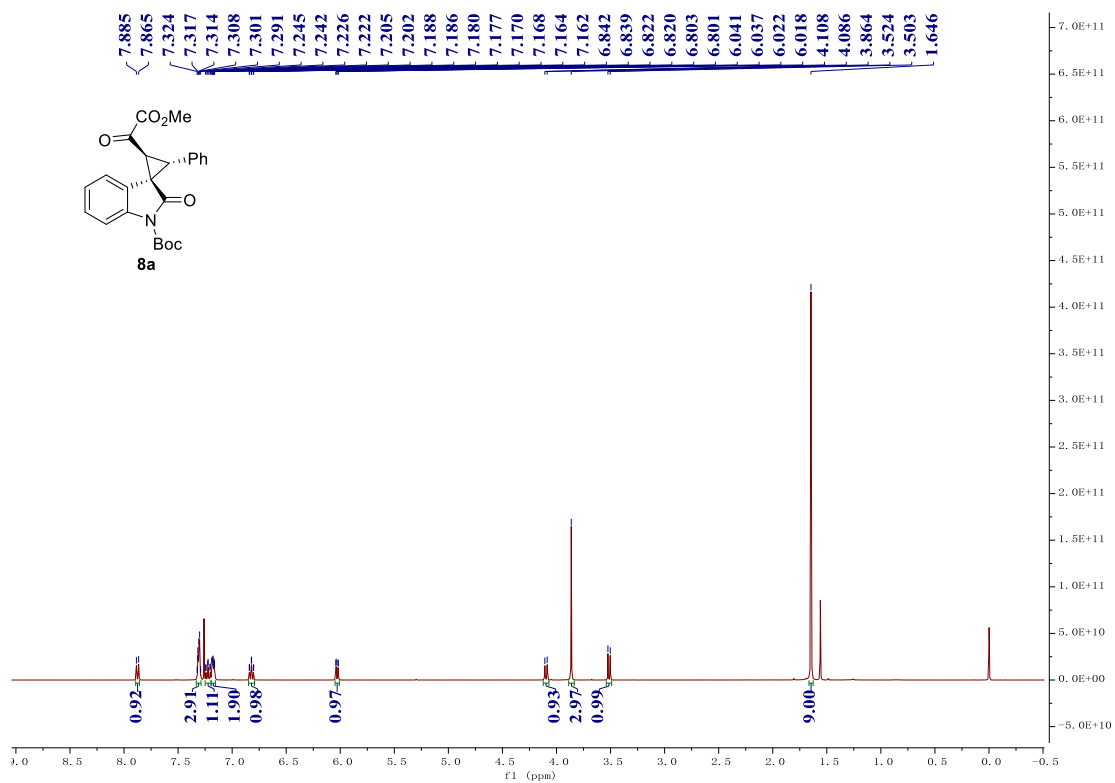

<sup>1</sup>H NMR Spectrum of **10a** (400 MHz, CDCl<sub>3</sub>)

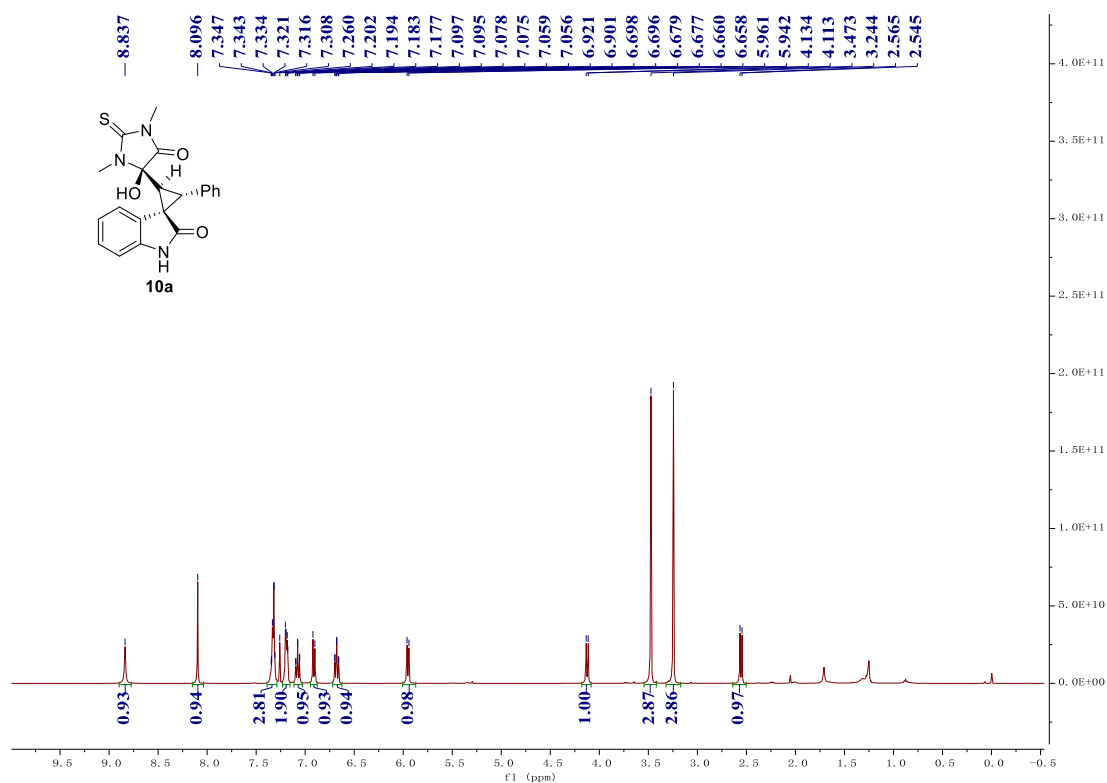

<sup>13</sup>C NMR Spectrum of **10a** (100 MHz, CDCl<sub>3</sub>)

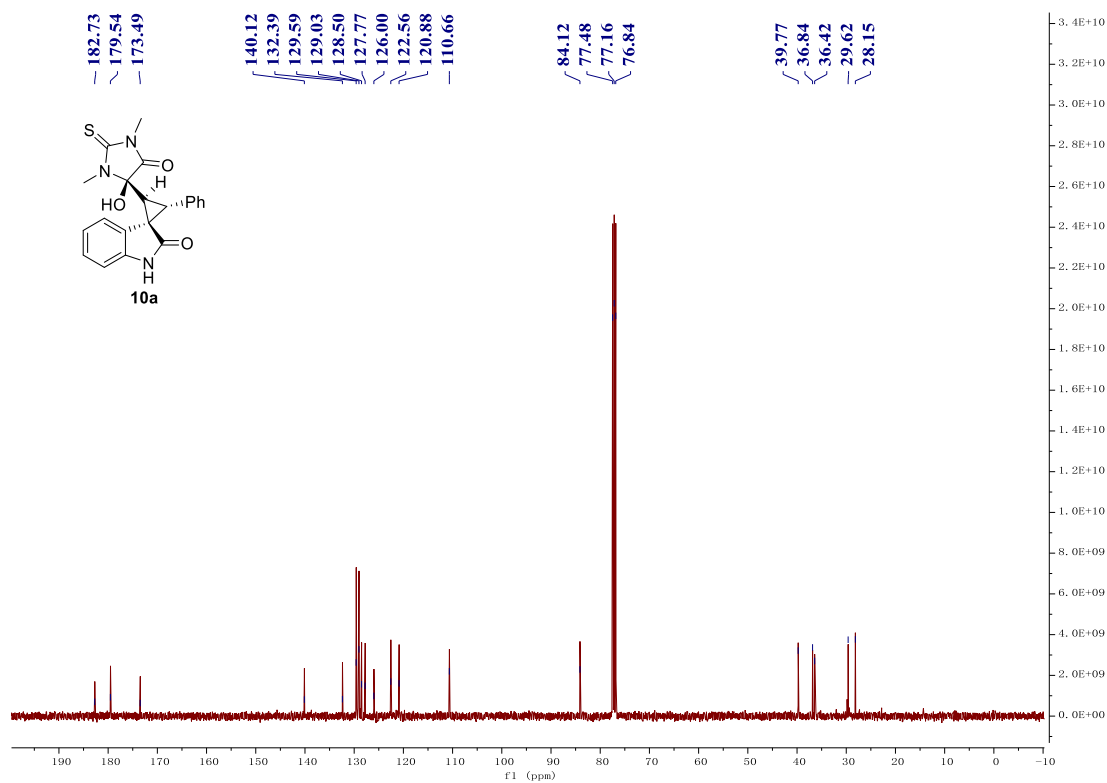

<sup>1</sup>H NMR Spectrum of **11a** (400 MHz, CDCl<sub>3</sub>)

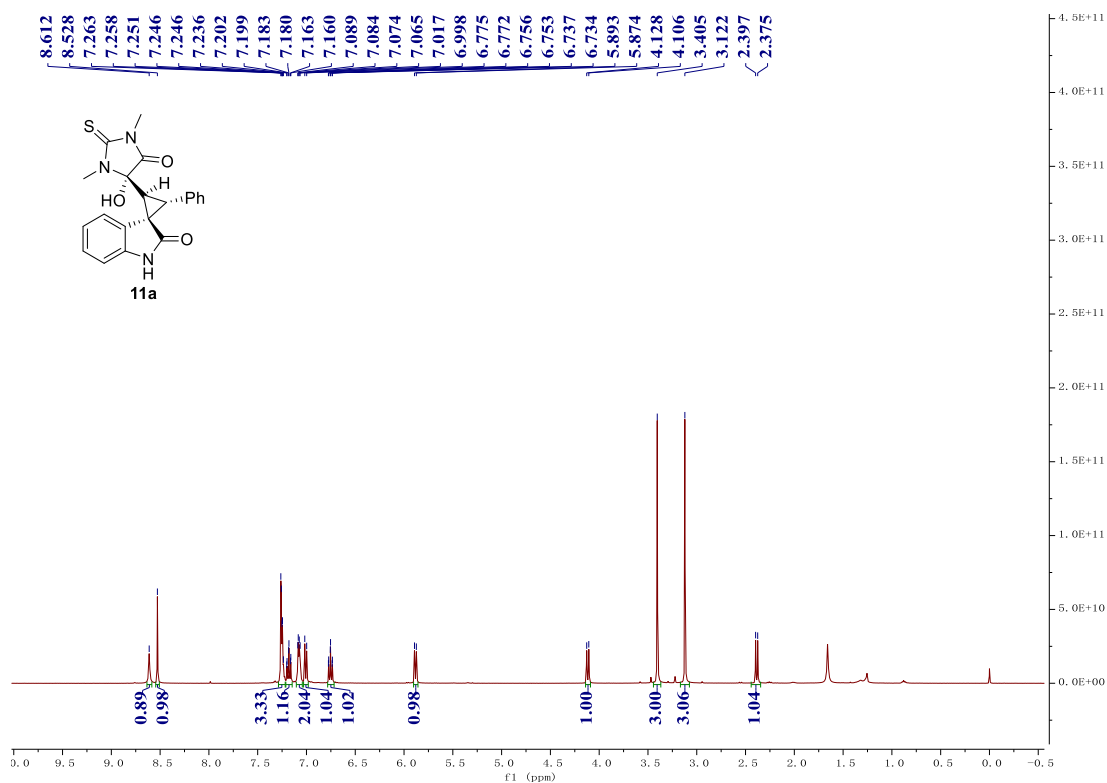

<sup>13</sup>C NMR Spectrum of **11a** (100 MHz, CDCl<sub>3</sub>)

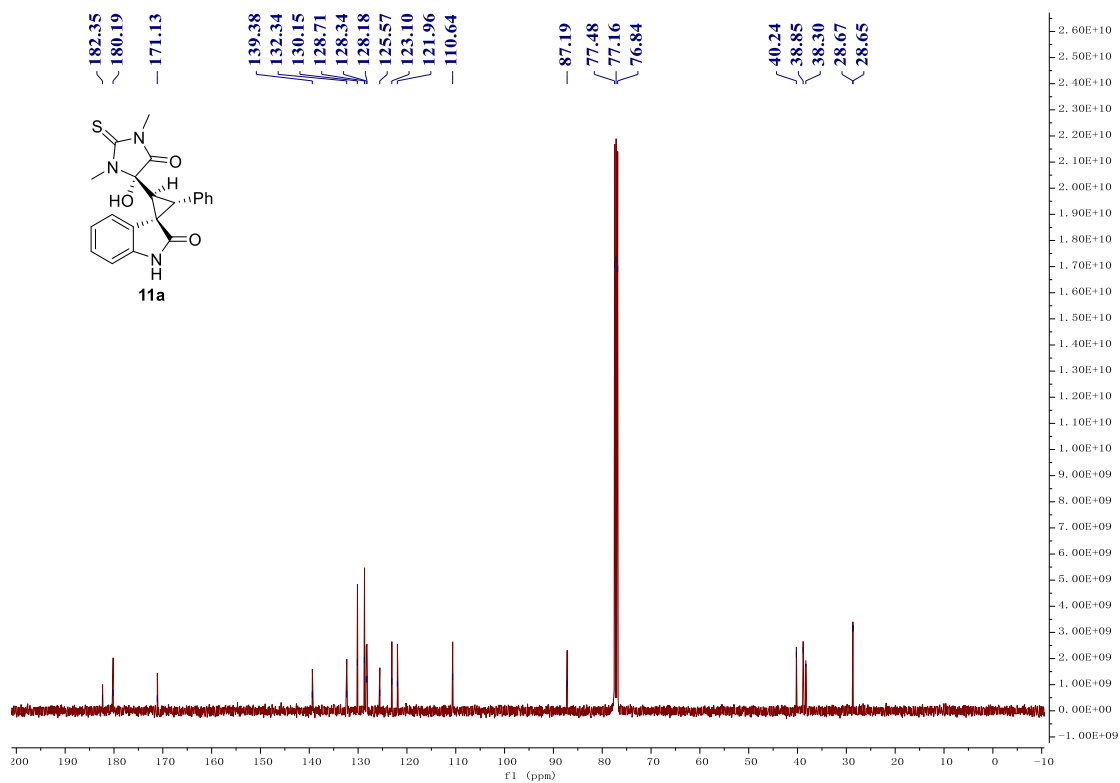

## HPLC spectra

HPLC Spectrum of **3a**

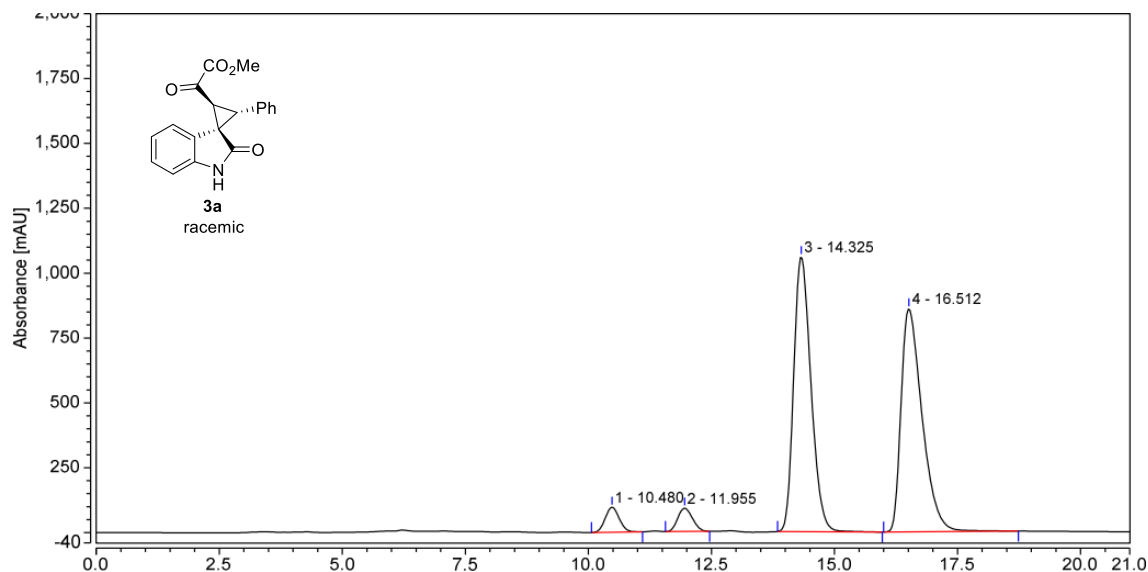

| Peak          | Retention Time<br>min | Area<br>mAU*min | Height<br>mAU   | Area<br>%     | Height<br>%   |
|---------------|-----------------------|-----------------|-----------------|---------------|---------------|
| 1             | 10.480                | 31.817          | 96.448          | 3.46          | 4.58          |
| 2             | 11.955                | 31.078          | 90.023          | 3.38          | 4.27          |
| 3             | 14.325                | 430.583         | 1060.196        | 46.84         | 50.33         |
| 4             | 16.512                | 425.876         | 859.651         | 46.32         | 40.81         |
| <b>Total:</b> |                       | <b>919.354</b>  | <b>2106.318</b> | <b>100.00</b> | <b>100.00</b> |

HPLC Spectrum of **3a**

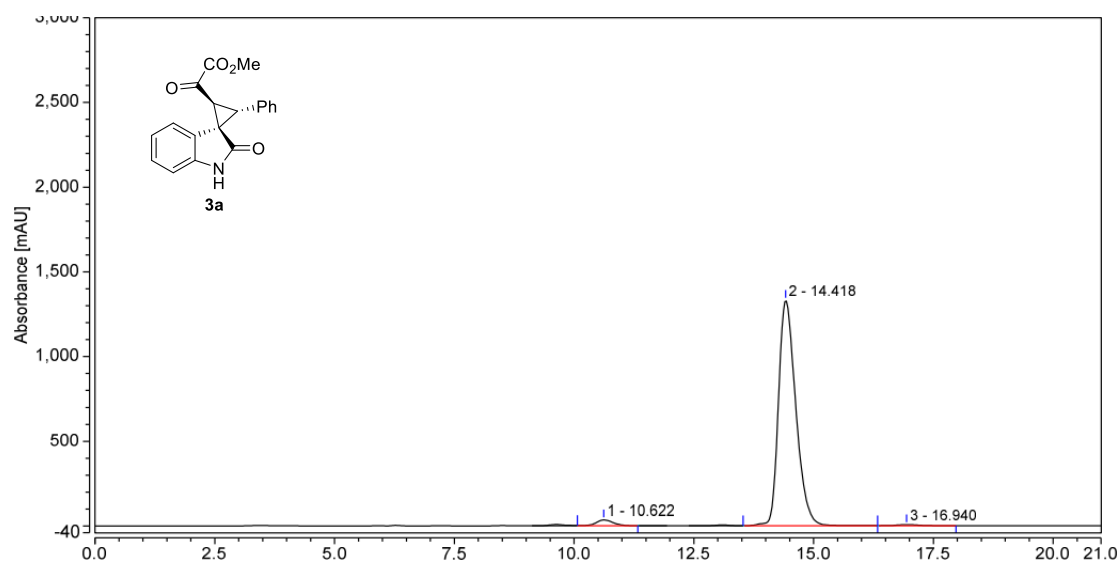

| Peak          | Retention Time<br>min | Area<br>mAU*min | Height<br>mAU   | Area<br>%     | Height<br>%   |
|---------------|-----------------------|-----------------|-----------------|---------------|---------------|
| 1             | 10.622                | 14.906          | 34.933          | 2.58          | 2.55          |
| 2             | 14.418                | 558.423         | 1330.870        | 96.81         | 96.99         |
| 3             | 16.940                | 3.476           | 6.402           | 0.60          | 0.47          |
| <b>Total:</b> |                       | <b>576.805</b>  | <b>1372.205</b> | <b>100.00</b> | <b>100.00</b> |



### HPLC Spectrum of *ent-3a*

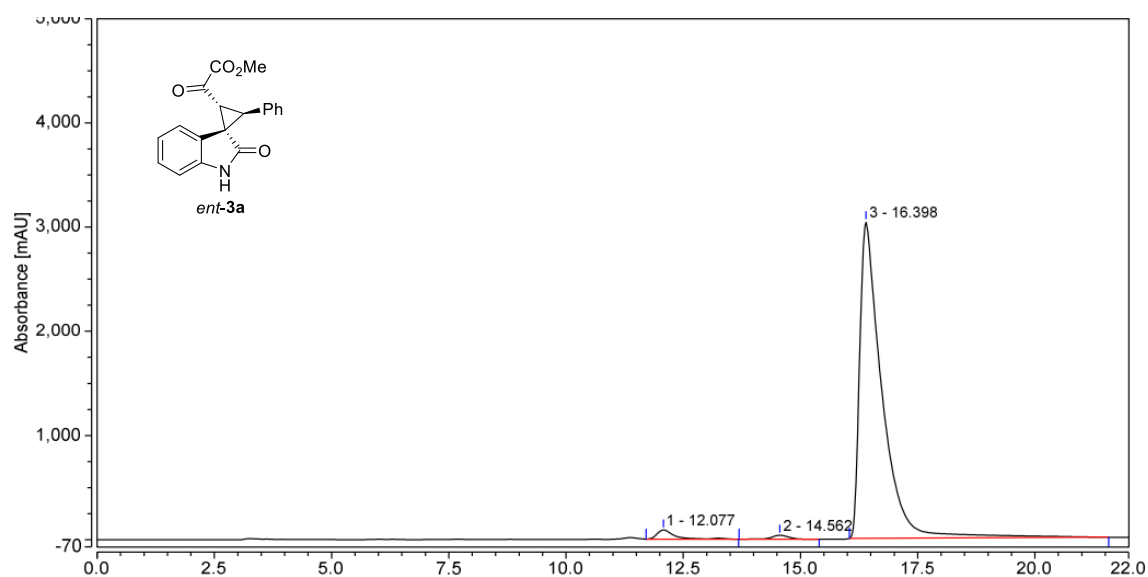

| Peak          | Retention Time<br>min | Area<br>mAU*min | Height<br>mAU   | Area<br>%     | Height<br>%   |
|---------------|-----------------------|-----------------|-----------------|---------------|---------------|
| 1             | 12.077                | 38.901          | 87.277          | 2.24          | 2.76          |
| 2             | 14.562                | 16.648          | 38.202          | 0.96          | 1.21          |
| 3             | 16.398                | 1682.862        | 3039.956        | 96.80         | 96.04         |
| <b>Total:</b> |                       | <b>1738.411</b> | <b>3165.435</b> | <b>100.00</b> | <b>100.00</b> |

### HPLC Spectrum of **3b**

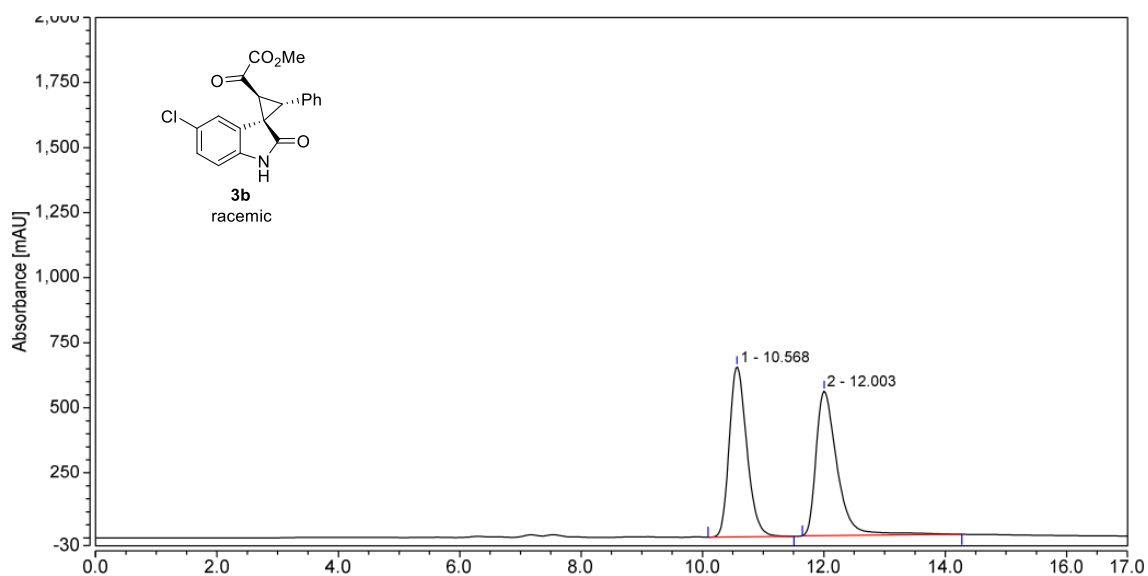

| Peak         | Retention Time<br>min | Area<br>mAU*min | Height<br>mAU   | Area<br>%     | Height<br>%   |
|--------------|-----------------------|-----------------|-----------------|---------------|---------------|
| 1            | 10.568                | 219.456         | 654.306         | 49.50         | 54.11         |
| 2            | 12.003                | 223.906         | 554.951         | 50.50         | 45.89         |
| <b>Total</b> |                       | <b>443.363</b>  | <b>1209.257</b> | <b>100.00</b> | <b>100.00</b> |

### HPLC Spectrum of **3b**

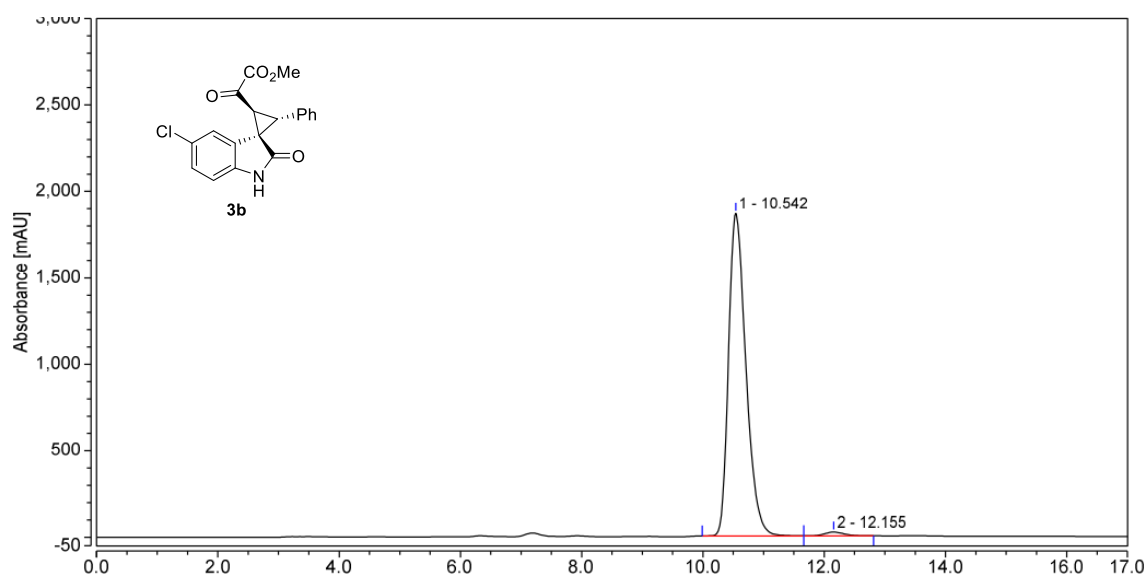

| Peak         | Retention Time<br>min | Area<br>mAU*min | Height<br>mAU   | Area<br>%     | Height<br>%   |
|--------------|-----------------------|-----------------|-----------------|---------------|---------------|
| 1            | 10.542                | 618.872         | 1866.345        | 98.71         | 98.85         |
| 2            | 12.155                | 8.057           | 21.799          | 1.29          | 1.15          |
| <b>Total</b> |                       | <b>626.929</b>  | <b>1888.144</b> | <b>100.00</b> | <b>100.00</b> |

### HPLC Spectrum of *ent-3b*

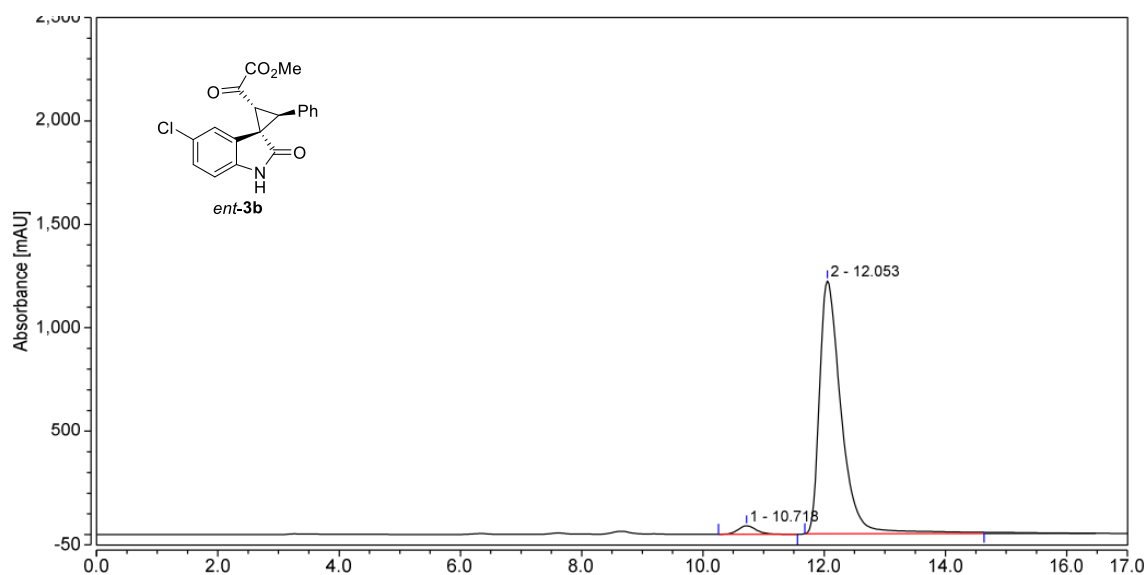

| Peak         | Retention Time<br>min | Area<br>mAU*min | Height<br>mAU   | Area<br>%     | Height<br>%   |
|--------------|-----------------------|-----------------|-----------------|---------------|---------------|
| 1            | 10.718                | 14.303          | 40.891          | 2.74          | 3.24          |
| 2            | 12.053                | 507.774         | 1222.209        | 97.26         | 96.76         |
| <b>Total</b> |                       | <b>522.077</b>  | <b>1263.100</b> | <b>100.00</b> | <b>100.00</b> |

### HPLC Spectrum of 3c

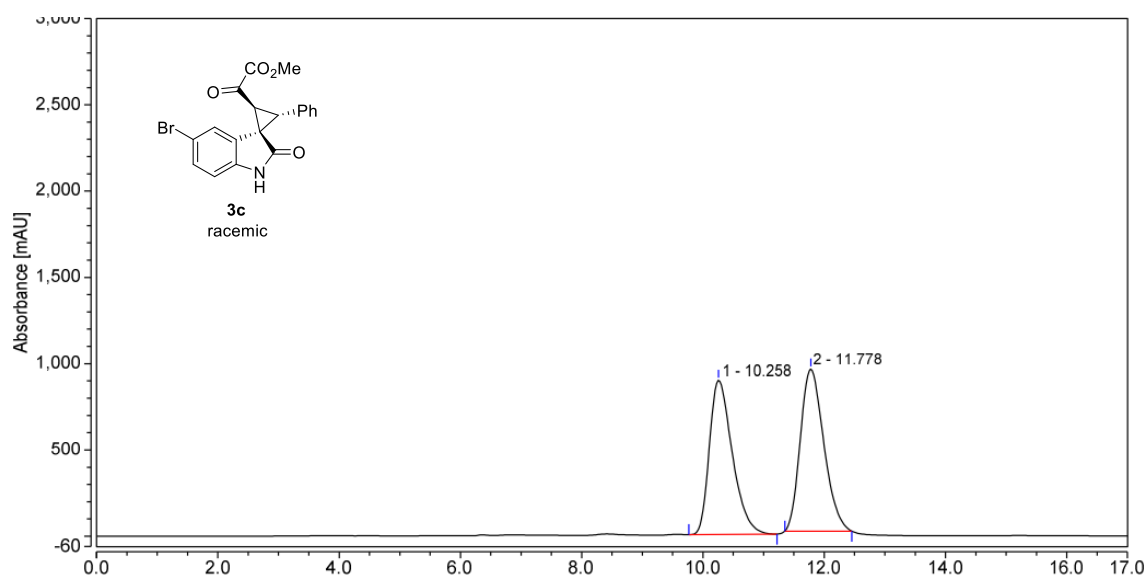

| Peak         | Retention Time<br>min | Area<br>mAU*min | Height<br>mAU   | Area<br>%     | Height<br>%   |
|--------------|-----------------------|-----------------|-----------------|---------------|---------------|
| 1            | 10.258                | 392.127         | 893.520         | 48.19         | 48.74         |
| 2            | 11.778                | 421.635         | 939.800         | 51.81         | 51.26         |
| <b>Total</b> |                       | <b>813.762</b>  | <b>1833.320</b> | <b>100.00</b> | <b>100.00</b> |

### HPLC Spectrum of 3c

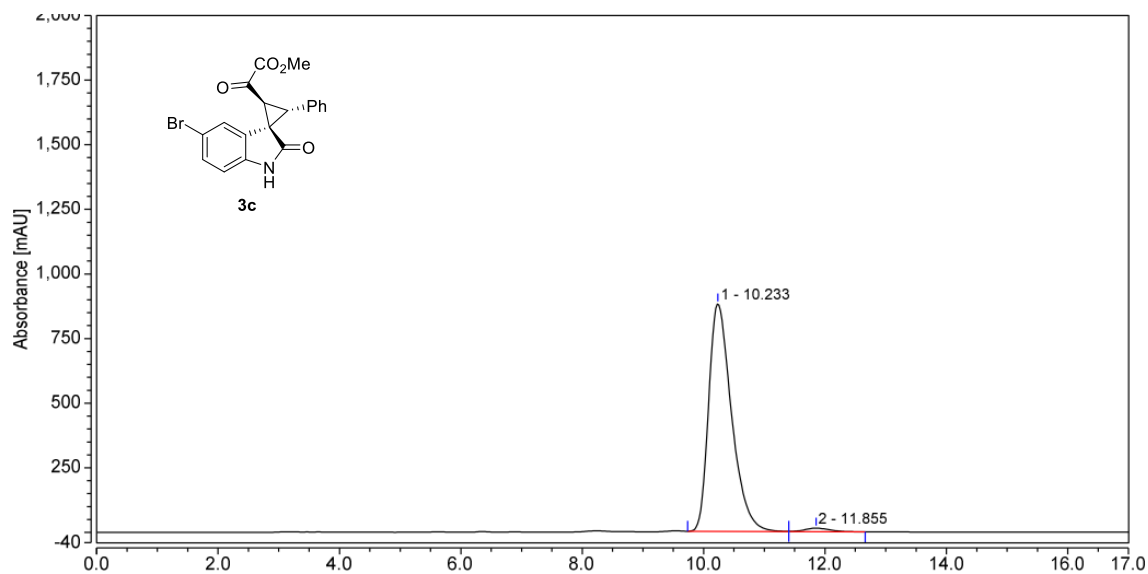

| Peak         | Retention Time<br>min | Area<br>mAU*min | Height<br>mAU  | Area<br>%     | Height<br>%   |
|--------------|-----------------------|-----------------|----------------|---------------|---------------|
| 1            | 10.233                | 385.080         | 880.280        | 98.33         | 98.45         |
| 2            | 11.855                | 6.533           | 13.888         | 1.67          | 1.55          |
| <b>Total</b> |                       | <b>391.613</b>  | <b>894.168</b> | <b>100.00</b> | <b>100.00</b> |

### HPLC Spectrum of 3d

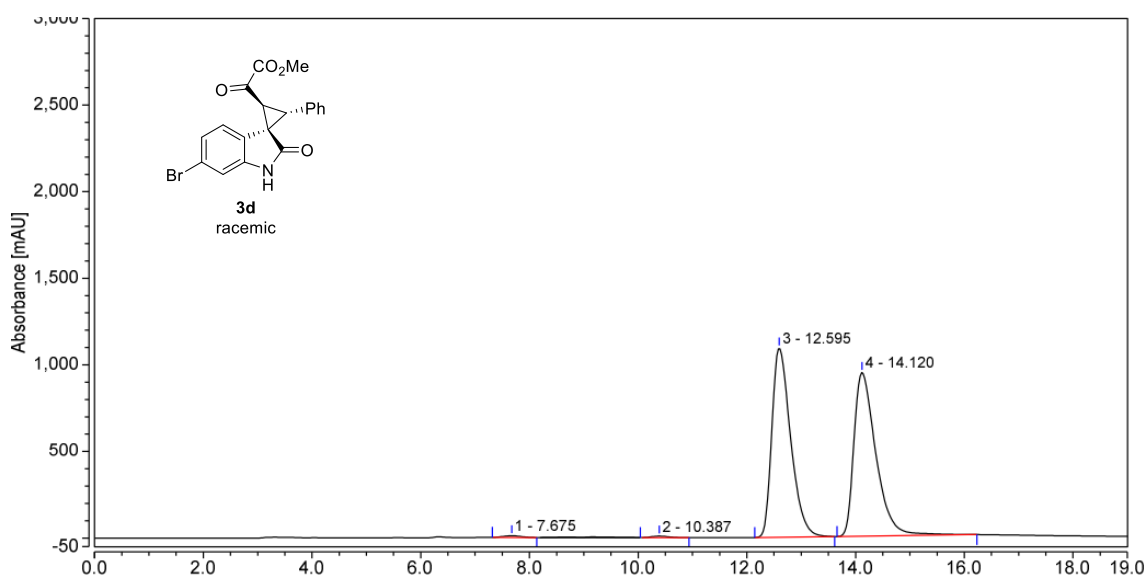

| Peak         | Retention Time<br>min | Area<br>mAU*min | Height<br>mAU   | Area<br>%     | Height<br>%   |
|--------------|-----------------------|-----------------|-----------------|---------------|---------------|
| 1            | 7.675                 | 3.599           | 9.824           | 0.41          | 0.48          |
| 2            | 10.387                | 3.164           | 8.833           | 0.36          | 0.43          |
| 3            | 12.595                | 437.768         | 1093.479        | 49.33         | 53.13         |
| 4            | 14.120                | 442.938         | 945.913         | 49.91         | 45.96         |
| <b>Total</b> |                       | <b>887.469</b>  | <b>2058.049</b> | <b>100.00</b> | <b>100.00</b> |

### HPLC Spectrum of 3d

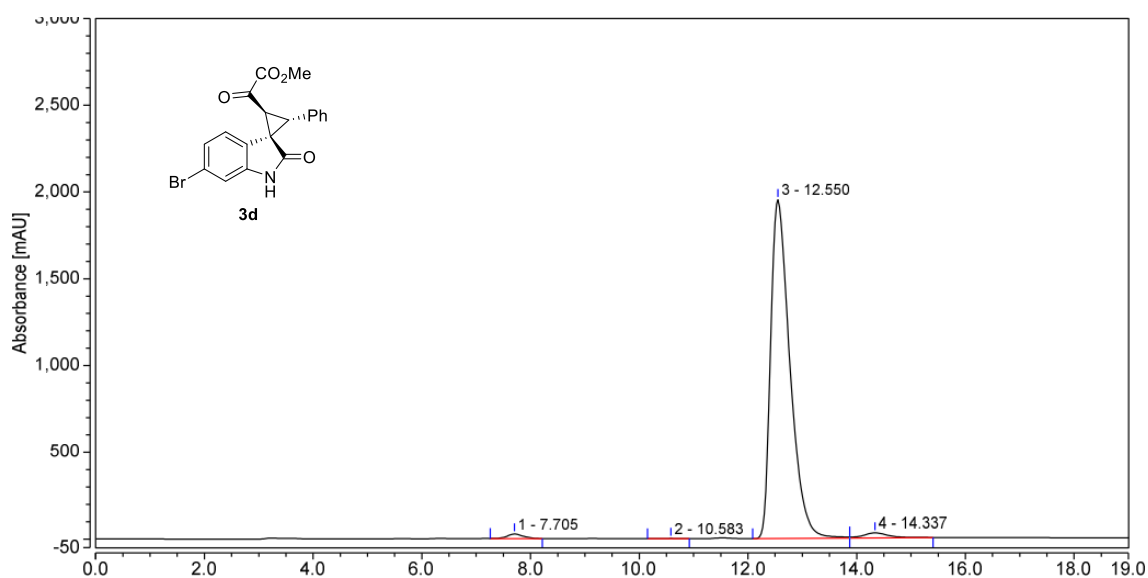

| Peak         | Retention Time<br>min | Area<br>mAU*min | Height<br>mAU   | Area<br>%     | Height<br>%   |
|--------------|-----------------------|-----------------|-----------------|---------------|---------------|
| 1            | 7.705                 | 8.817           | 26.135          | 1.07          | 1.30          |
| 2            | 10.583                | 0.508           | 1.542           | 0.06          | 0.08          |
| 3            | 12.550                | 802.233         | 1953.340        | 96.99         | 97.16         |
| 4            | 14.337                | 15.602          | 29.413          | 1.89          | 1.46          |
| <b>Total</b> |                       | <b>827.161</b>  | <b>2010.430</b> | <b>100.00</b> | <b>100.00</b> |

### HPLC Spectrum of *ent*-3d

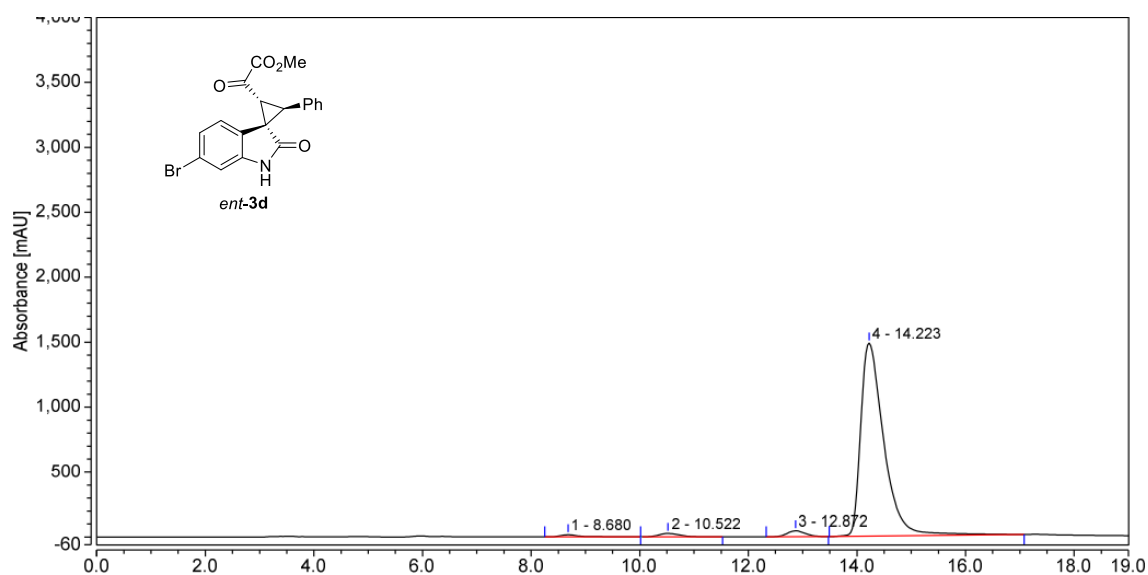

| Peak         | Retention Time<br>min | Area<br>mAU*min | Height<br>mAU   | Area<br>%     | Height<br>%   |
|--------------|-----------------------|-----------------|-----------------|---------------|---------------|
| 1            | 8.680                 | 6.759           | 16.118          | 0.88          | 1.02          |
| 2            | 10.522                | 11.852          | 26.330          | 1.54          | 1.67          |
| 3            | 12.872                | 17.985          | 45.602          | 2.34          | 2.90          |
| 4            | 14.223                | 733.283         | 1486.080        | 95.25         | 94.41         |
| <b>Total</b> |                       | <b>769.880</b>  | <b>1574.131</b> | <b>100.00</b> | <b>100.00</b> |

### HPLC Spectrum of 3e

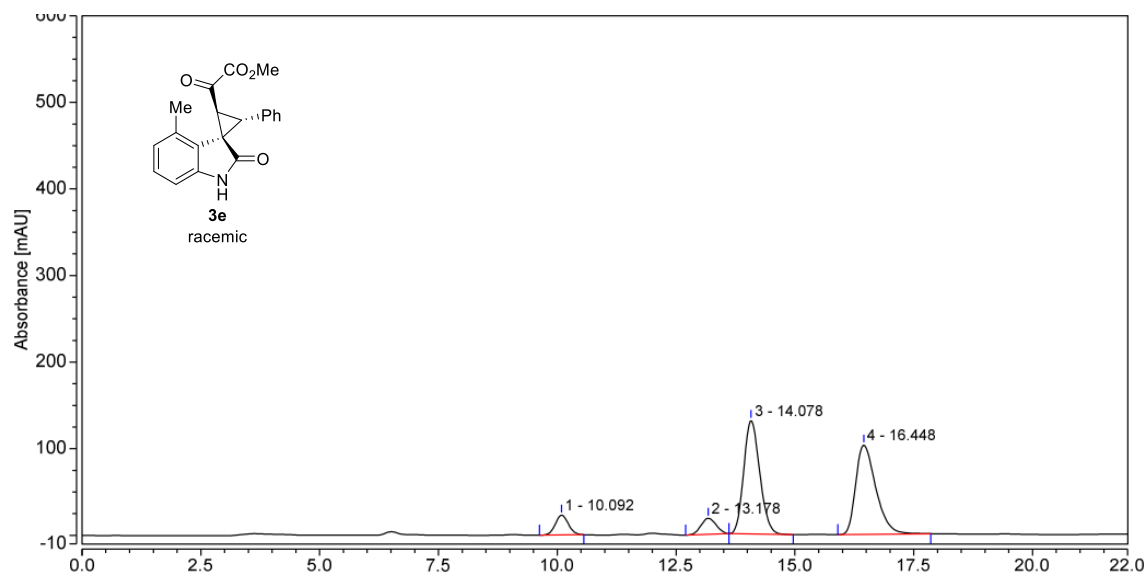

| Peak         | Retention Time<br>min | Area<br>mAU*min | Height<br>mAU  | Area<br>%     | Height<br>%   |
|--------------|-----------------------|-----------------|----------------|---------------|---------------|
| 1            | 10.092                | 7.317           | 22.876         | 6.30          | 8.29          |
| 2            | 13.178                | 6.841           | 18.580         | 5.89          | 6.74          |
| 3            | 14.078                | 51.321          | 131.192        | 44.15         | 47.56         |
| 4            | 16.448                | 50.757          | 103.185        | 43.67         | 37.41         |
| <b>Total</b> |                       | <b>116.236</b>  | <b>275.832</b> | <b>100.00</b> | <b>100.00</b> |

### HPLC Spectrum of 3e

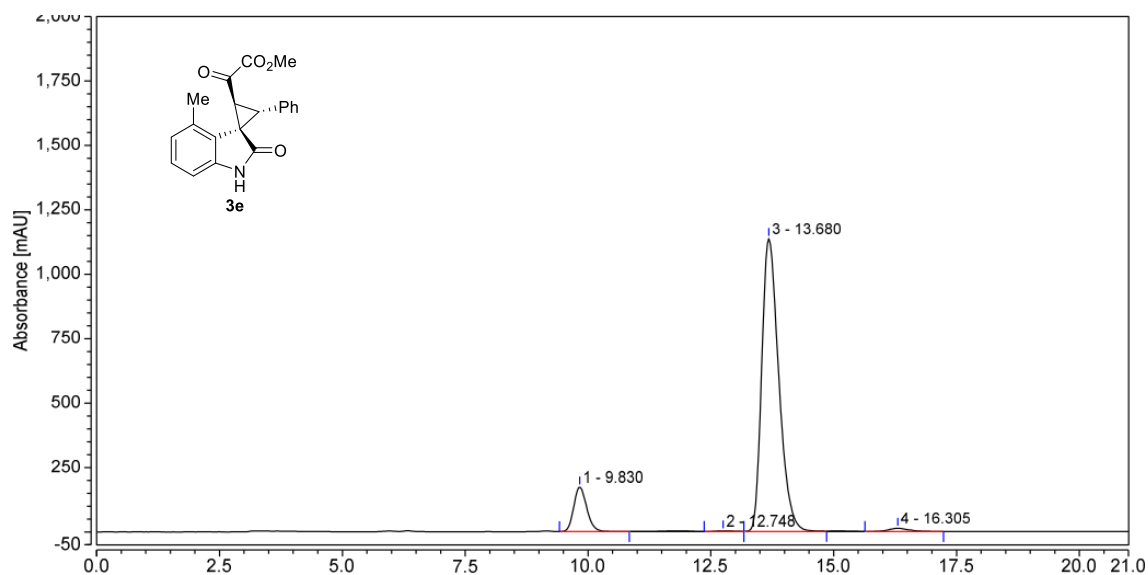

| Peak         | Retention Time<br>min | Area<br>mAU*min | Height<br>mAU   | Area<br>%     | Height<br>%   |
|--------------|-----------------------|-----------------|-----------------|---------------|---------------|
| 1            | 9.830                 | 53.291          | 173.053         | 10.30         | 13.06         |
| 2            | 12.748                | 1.170           | 2.496           | 0.23          | 0.19          |
| 3            | 13.680                | 456.936         | 1137.661        | 88.31         | 85.84         |
| 4            | 16.305                | 6.013           | 12.132          | 1.16          | 0.92          |
| <b>Total</b> |                       | <b>517.409</b>  | <b>1325.343</b> | <b>100.00</b> | <b>100.00</b> |

### HPLC Spectrum of 3f

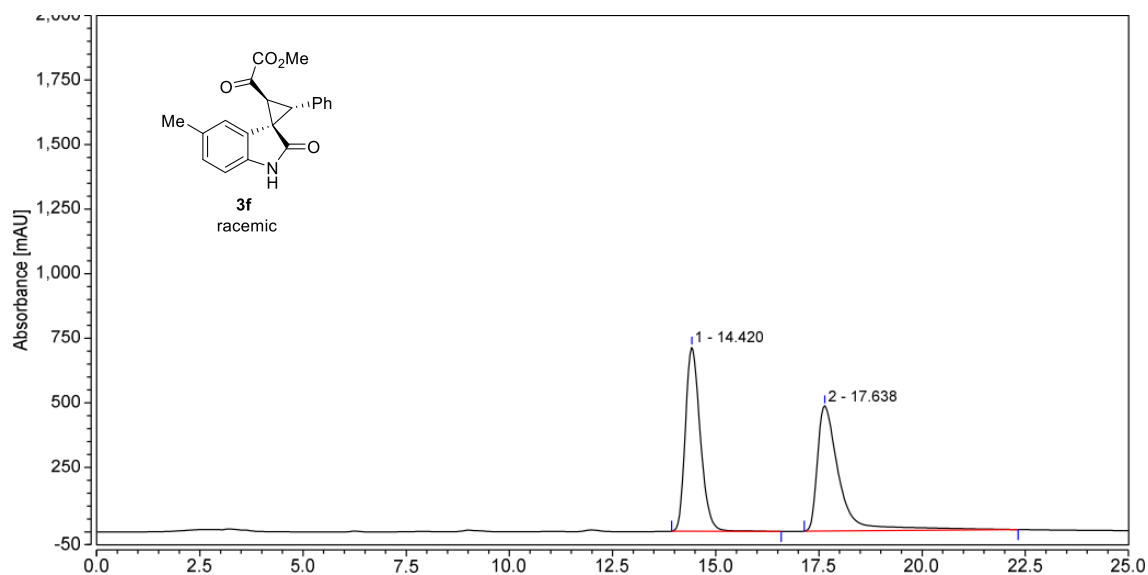

| Peak         | Retention Time<br>min | Area<br>mAU*min | Height<br>mAU   | Area<br>%     | Height<br>%   |
|--------------|-----------------------|-----------------|-----------------|---------------|---------------|
| 1            | 14.420                | 299.148         | 713.083         | 49.88         | 59.53         |
| 2            | 17.638                | 300.535         | 484.850         | 50.12         | 40.47         |
| <b>Total</b> |                       | <b>599.683</b>  | <b>1197.933</b> | <b>100.00</b> | <b>100.00</b> |

### HPLC Spectrum of 3f

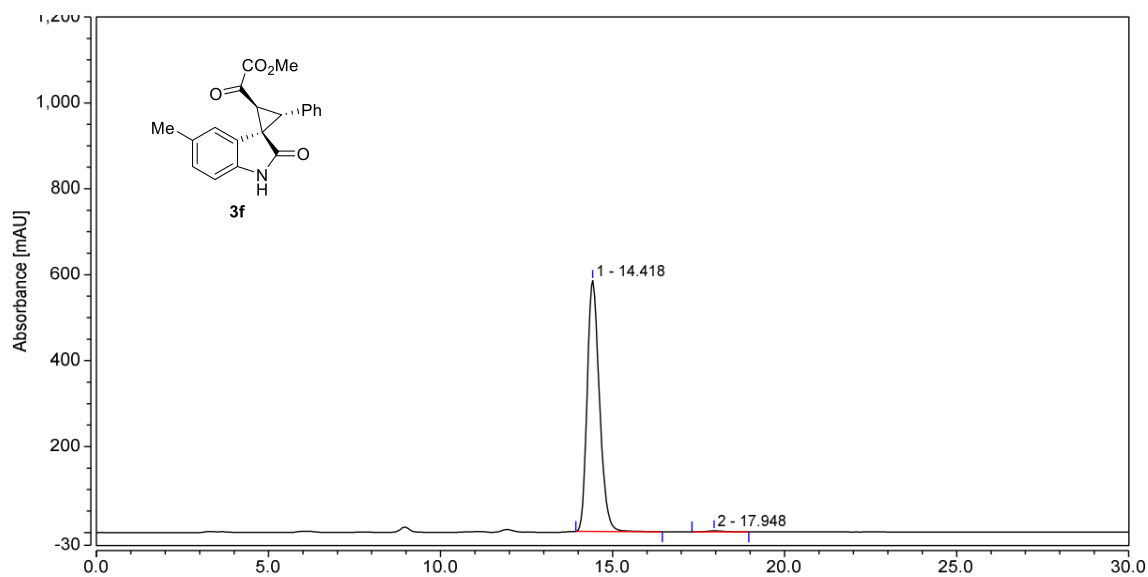

| Peak         | Retention Time<br>min | Area<br>mAU*min | Height<br>mAU  | Area<br>%     | Height<br>%   |
|--------------|-----------------------|-----------------|----------------|---------------|---------------|
| 1            | 14.418                | 242.044         | 584.089        | 99.46         | 99.60         |
| 2            | 17.948                | 1.319           | 2.365          | 0.54          | 0.40          |
| <b>Total</b> |                       | <b>243.363</b>  | <b>586.454</b> | <b>100.00</b> | <b>100.00</b> |

### HPLC Spectrum of 3g

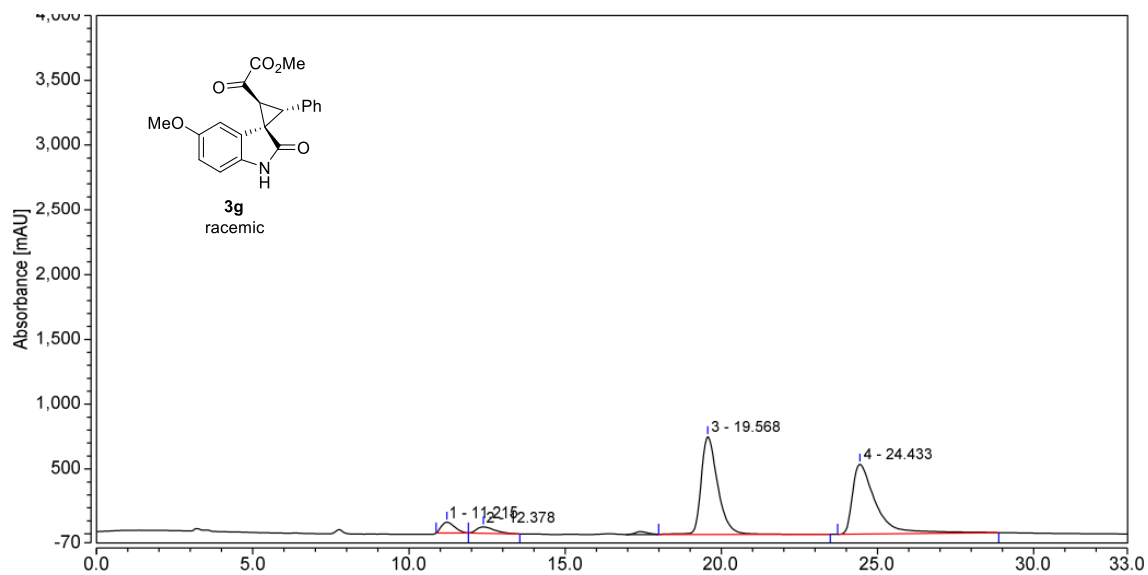

| Peak         | Retention Time<br>min | Area<br>mAU*min | Height<br>mAU   | Area<br>%     | Height<br>%   |
|--------------|-----------------------|-----------------|-----------------|---------------|---------------|
| 1            | 11.215                | 41.163          | 83.167          | 4.10          | 5.83          |
| 2            | 12.378                | 32.676          | 49.338          | 3.25          | 3.46          |
| 3            | 19.568                | 465.466         | 755.175         | 46.31         | 52.93         |
| 4            | 24.433                | 465.811         | 538.944         | 46.34         | 37.78         |
| <b>Total</b> |                       | <b>1005.116</b> | <b>1426.623</b> | <b>100.00</b> | <b>100.00</b> |

### HPLC Spectrum of **3g**

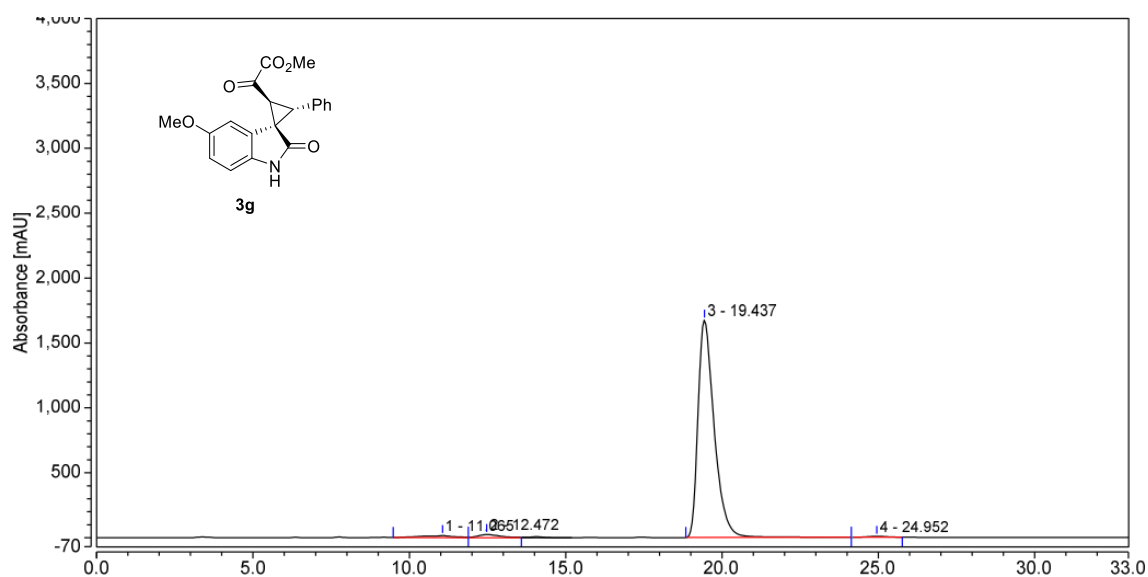

| Peak         | Retention Time<br>min | Area<br>mAU*min | Height<br>mAU   | Area<br>%     | Height<br>%   |
|--------------|-----------------------|-----------------|-----------------|---------------|---------------|
| 1            | 11.065                | 17.697          | 14.771          | 1.69          | 0.86          |
| 2            | 12.472                | 19.613          | 24.360          | 1.87          | 1.42          |
| 3            | 19.437                | 1005.616        | 1674.406        | 95.93         | 97.30         |
| 4            | 24.952                | 5.302           | 7.368           | 0.51          | 0.43          |
| <b>Total</b> |                       | <b>1048.228</b> | <b>1720.905</b> | <b>100.00</b> | <b>100.00</b> |

### HPLC Spectrum of *ent*-**3g**

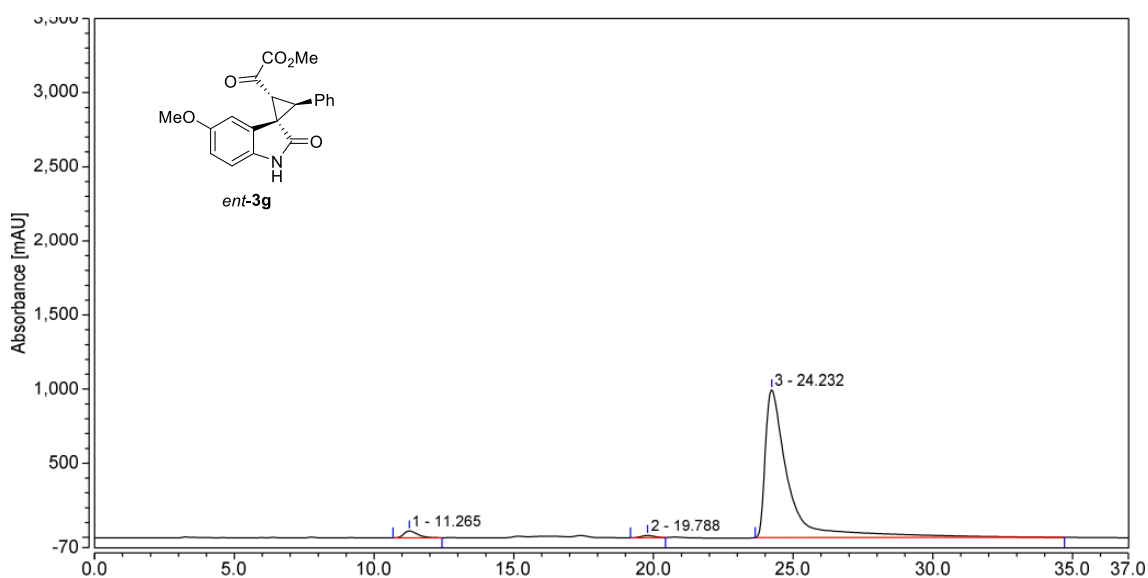

| Peak         | Retention Time<br>min | Area<br>mAU*min | Height<br>mAU   | Area<br>%     | Height<br>%   |
|--------------|-----------------------|-----------------|-----------------|---------------|---------------|
| 1            | 11.265                | 26.315          | 46.625          | 2.61          | 4.40          |
| 2            | 19.788                | 7.914           | 15.065          | 0.78          | 1.42          |
| 3            | 24.232                | 975.043         | 996.900         | 96.61         | 94.17         |
| <b>Total</b> |                       | <b>1009.272</b> | <b>1058.590</b> | <b>100.00</b> | <b>100.00</b> |



### HPLC Spectrum of 3h

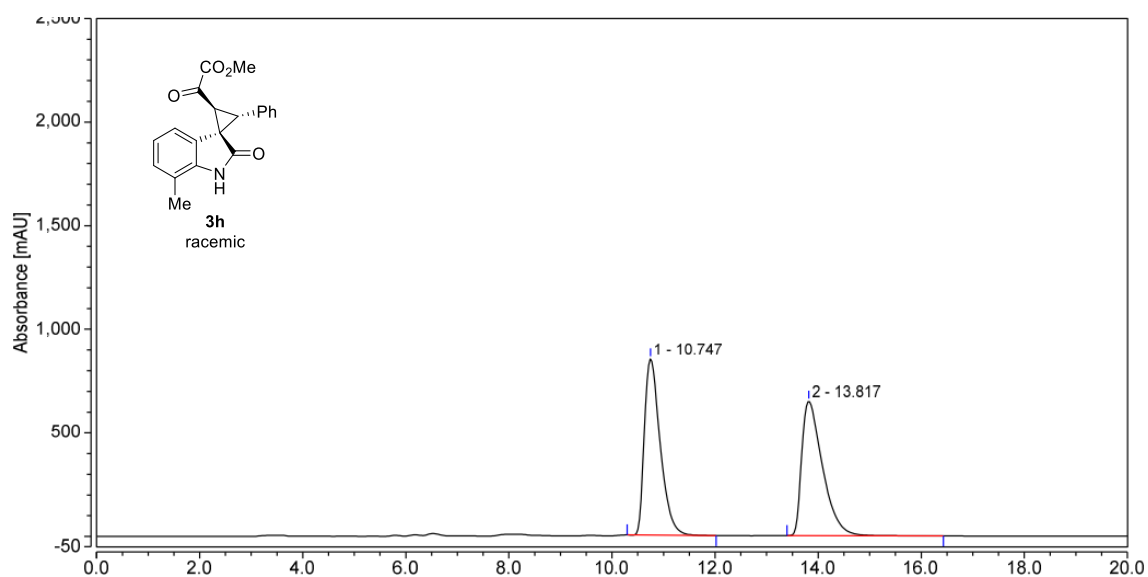

| Peak         | Retention Time<br>min | Area<br>mAU*min | Height<br>mAU   | Area<br>%     | Height<br>%   |
|--------------|-----------------------|-----------------|-----------------|---------------|---------------|
| 1            | 10.747                | 303.247         | 851.132         | 49.90         | 56.71         |
| 2            | 13.817                | 304.417         | 649.591         | 50.10         | 43.29         |
| <b>Total</b> |                       | <b>607.665</b>  | <b>1500.723</b> | <b>100.00</b> | <b>100.00</b> |

### HPLC Spectrum of 3h

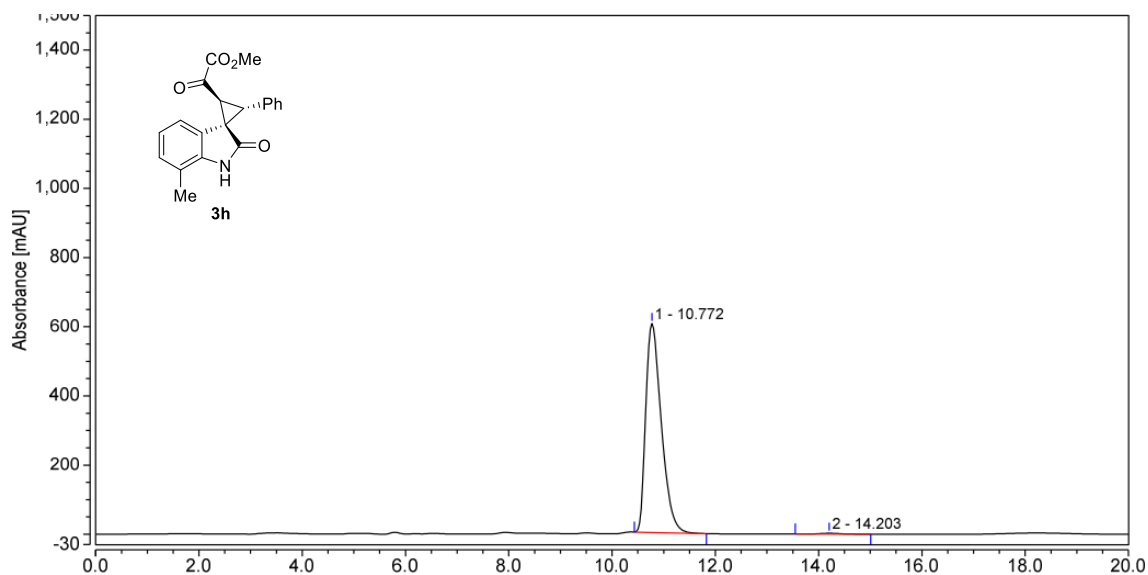

| Peak         | Retention Time<br>min | Area<br>mAU*min | Height<br>mAU  | Area<br>%     | Height<br>%   |
|--------------|-----------------------|-----------------|----------------|---------------|---------------|
| 1            | 10.772                | 211.132         | 604.217        | 99.45         | 99.59         |
| 2            | 14.203                | 1.162           | 2.496          | 0.55          | 0.41          |
| <b>Total</b> |                       | <b>212.294</b>  | <b>606.714</b> | <b>100.00</b> | <b>100.00</b> |

### HPLC Spectrum of *ent*-3h

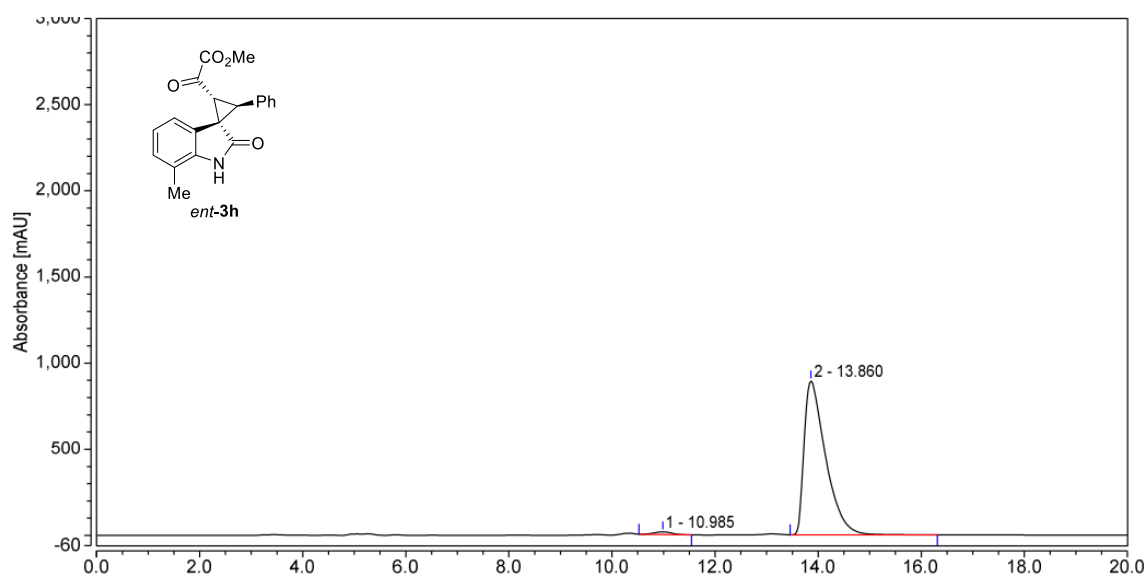

| Peak         | Retention Time<br>min | Area<br>mAU*min | Height<br>mAU  | Area<br>%     | Height<br>%   |
|--------------|-----------------------|-----------------|----------------|---------------|---------------|
| 1            | 10.985                | 6.139           | 15.631         | 1.40          | 1.72          |
| 2            | 13.860                | 431.494         | 893.074        | 98.60         | 98.28         |
| <b>Total</b> |                       | <b>437.633</b>  | <b>908.706</b> | <b>100.00</b> | <b>100.00</b> |

### HPLC Spectrum of 3i

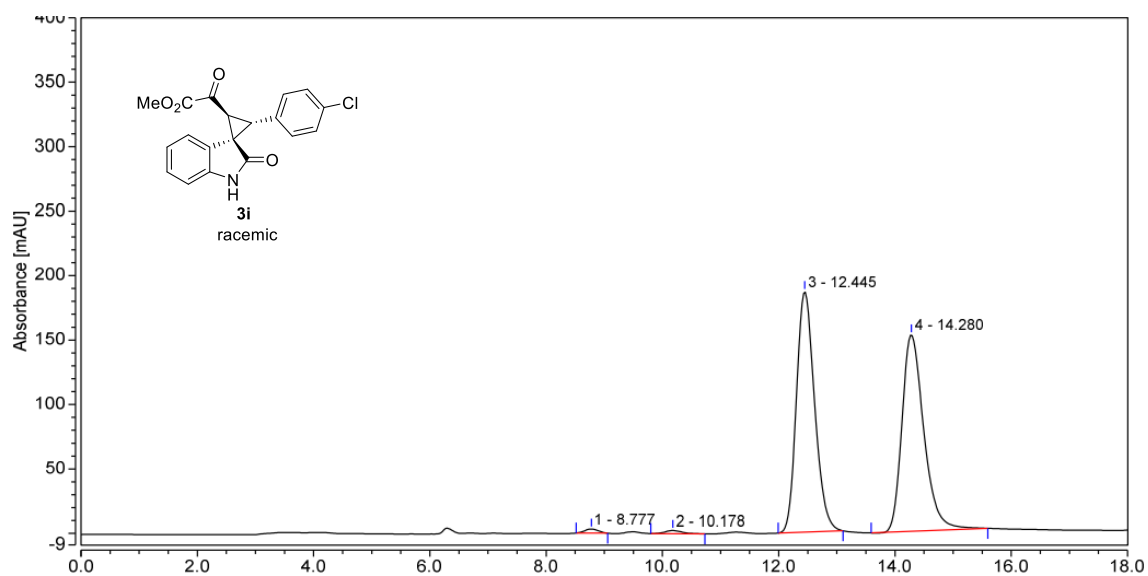

| Peak          | Retention Time<br>min | Area<br>mAU*min | Height<br>mAU  | Area<br>%     | Height<br>%   |
|---------------|-----------------------|-----------------|----------------|---------------|---------------|
| 1             | 8.777                 | 0.856           | 3.178          | 0.63          | 0.92          |
| 2             | 10.178                | 0.808           | 2.434          | 0.60          | 0.71          |
| 3             | 12.445                | 67.617          | 186.676        | 49.84         | 54.15         |
| 4             | 14.280                | 66.376          | 152.471        | 48.93         | 44.23         |
| <b>Total:</b> |                       | <b>135.656</b>  | <b>344.758</b> | <b>100.00</b> | <b>100.00</b> |

### HPLC Spectrum of **3i**

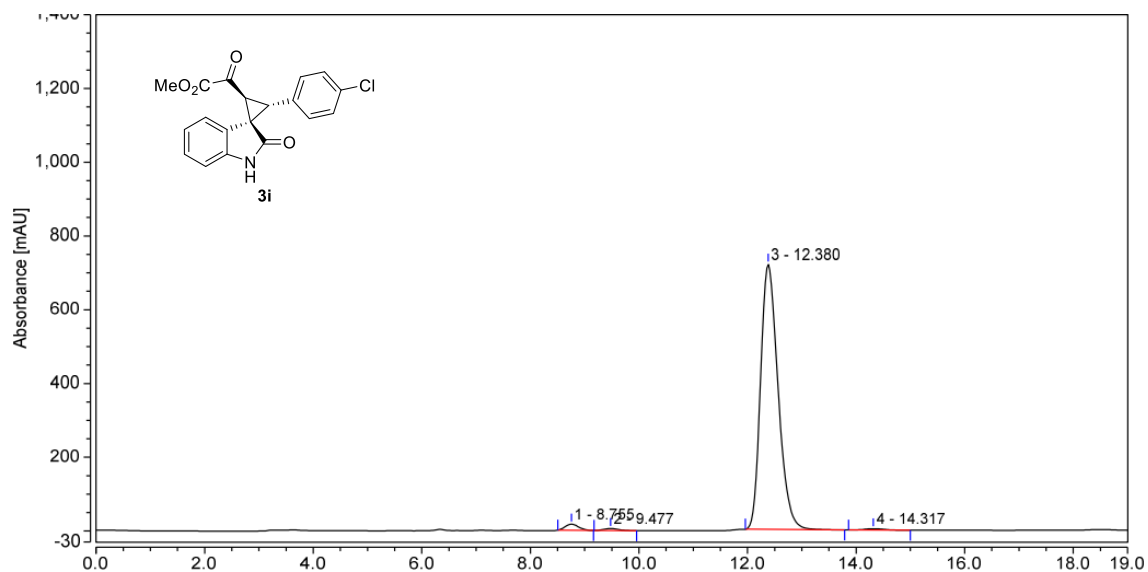

| Peak          | Retention Time<br>min | Area<br>mAU*min | Height<br>mAU  | Area<br>%     | Height<br>%   |
|---------------|-----------------------|-----------------|----------------|---------------|---------------|
| 1             | 8.755                 | 4.789           | 16.615         | 1.73          | 2.23          |
| 2             | 9.477                 | 1.683           | 5.590          | 0.61          | 0.75          |
| 3             | 12.380                | 268.371         | 719.040        | 97.10         | 96.52         |
| 4             | 14.317                | 1.542           | 3.692          | 0.56          | 0.50          |
| <b>Total:</b> |                       | <b>276.385</b>  | <b>744.937</b> | <b>100.00</b> | <b>100.00</b> |

### HPLC Spectrum of *ent-3i*

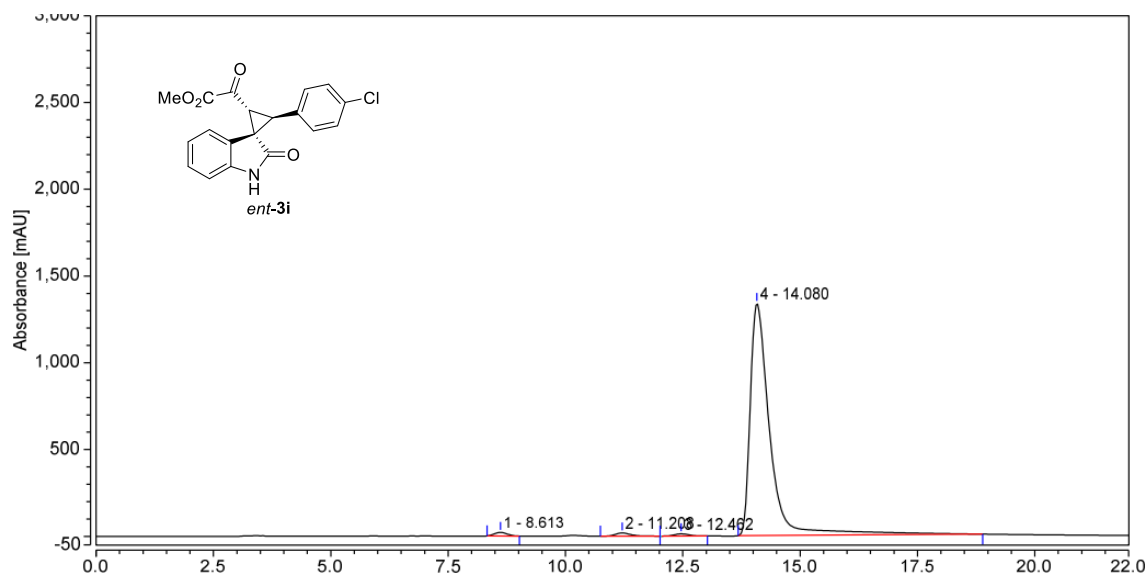

| Peak          | Retention Time<br>min | Area<br>mAU*min | Height<br>mAU   | Area<br>%     | Height<br>%   |
|---------------|-----------------------|-----------------|-----------------|---------------|---------------|
| 1             | 8.613                 | 6.440           | 20.573          | 0.96          | 1.48          |
| 2             | 11.208                | 6.810           | 18.277          | 1.01          | 1.32          |
| 3             | 12.462                | 4.539           | 12.657          | 0.68          | 0.91          |
| 4             | 14.080                | 653.680         | 1337.479        | 97.35         | 96.29         |
| <b>Total:</b> |                       | <b>671.469</b>  | <b>1388.986</b> | <b>100.00</b> | <b>100.00</b> |

### HPLC Spectrum of 3j

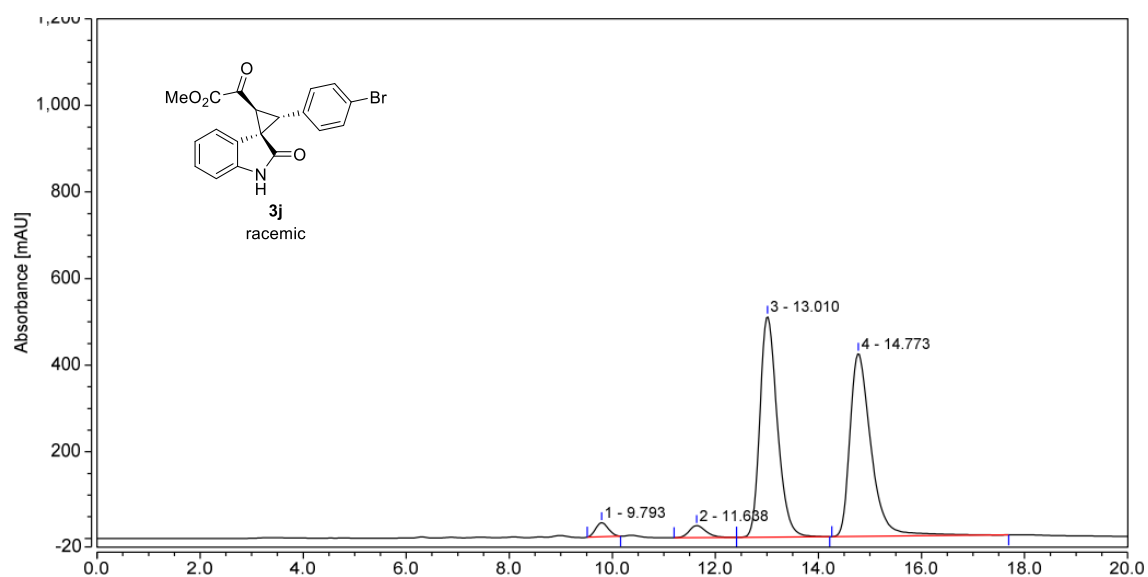

| Peak          | Retention Time<br>min | Area<br>mAU*min | Height<br>mAU  | Area<br>%     | Height<br>%   |
|---------------|-----------------------|-----------------|----------------|---------------|---------------|
| 1             | 9.793                 | 9.262           | 32.329         | 2.20          | 3.26          |
| 2             | 11.638                | 10.488          | 27.727         | 2.50          | 2.79          |
| 3             | 13.010                | 199.877         | 509.989        | 47.55         | 51.38         |
| 4             | 14.773                | 200.729         | 422.551        | 47.75         | 42.57         |
| <b>Total:</b> |                       | <b>420.356</b>  | <b>992.596</b> | <b>100.00</b> | <b>100.00</b> |

### HPLC Spectrum of 3j

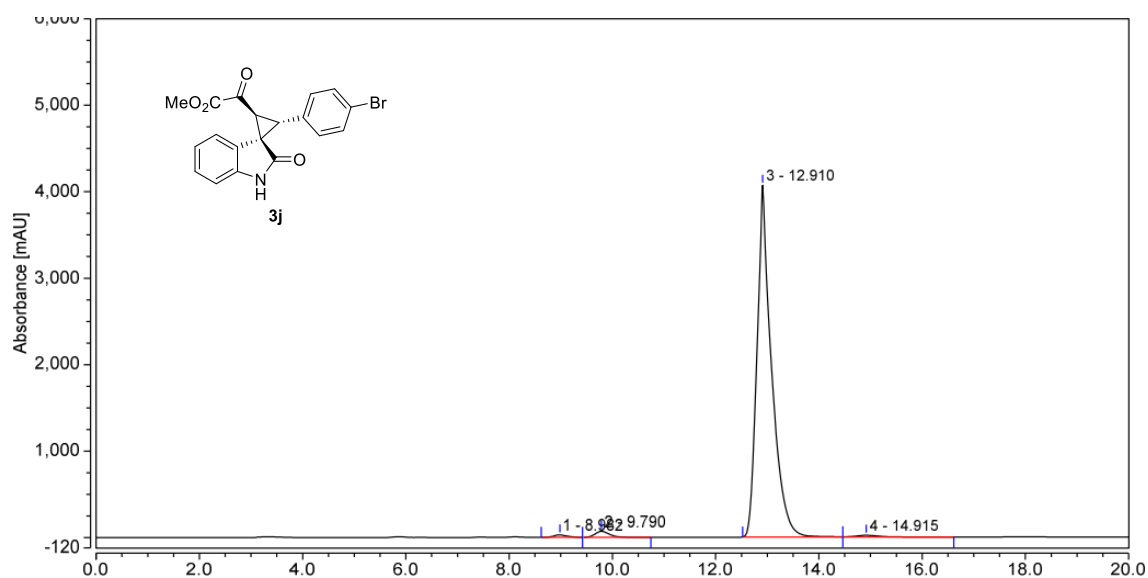

| Peak          | Retention Time<br>min | Area<br>mAU*min | Height<br>mAU   | Area<br>%     | Height<br>%   |
|---------------|-----------------------|-----------------|-----------------|---------------|---------------|
| 1             | 8.982                 | 8.625           | 28.329          | 0.63          | 0.68          |
| 2             | 9.790                 | 22.889          | 69.575          | 1.68          | 1.66          |
| 3             | 12.910                | 1321.099        | 4067.522        | 96.92         | 97.19         |
| 4             | 14.915                | 10.500          | 19.602          | 0.77          | 0.47          |
| <b>Total:</b> |                       | <b>1363.114</b> | <b>4185.028</b> | <b>100.00</b> | <b>100.00</b> |

### HPLC Spectrum of *ent*-3j

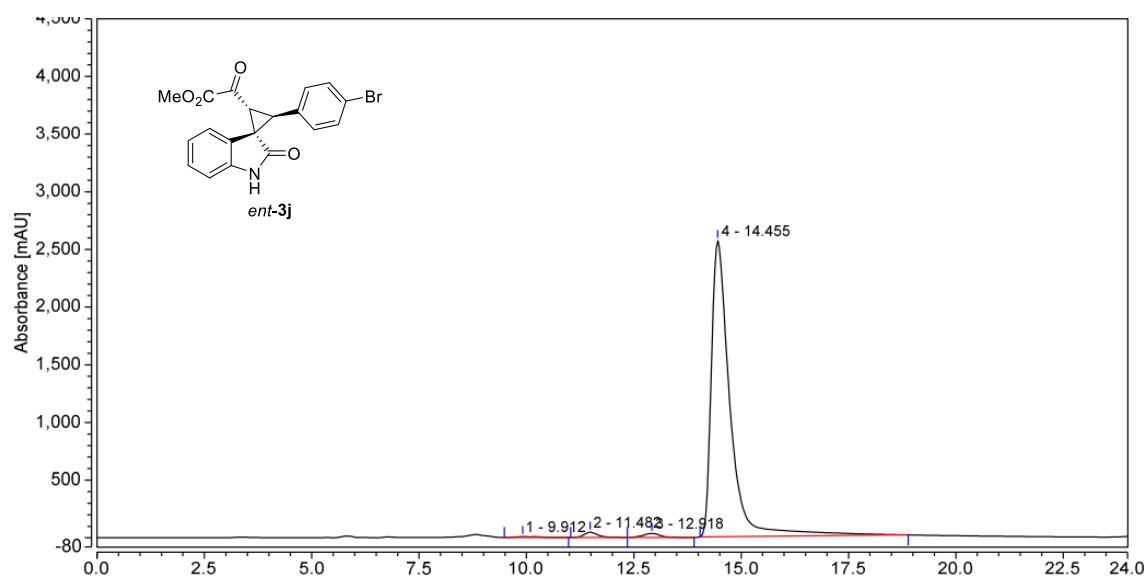

| Peak          | Retention Time<br>min | Area<br>mAU*min | Height<br>mAU   | Area<br>%     | Height<br>%   |
|---------------|-----------------------|-----------------|-----------------|---------------|---------------|
| 1             | 9.912                 | 4.489           | 7.566           | 0.34          | 0.28          |
| 2             | 11.482                | 17.033          | 45.071          | 1.28          | 1.70          |
| 3             | 12.918                | 15.426          | 34.604          | 1.16          | 1.30          |
| 4             | 14.455                | 1296.690        | 2569.022        | 97.23         | 96.72         |
| <b>Total:</b> |                       | <b>1333.637</b> | <b>2656.263</b> | <b>100.00</b> | <b>100.00</b> |

### HPLC Spectrum of 3k

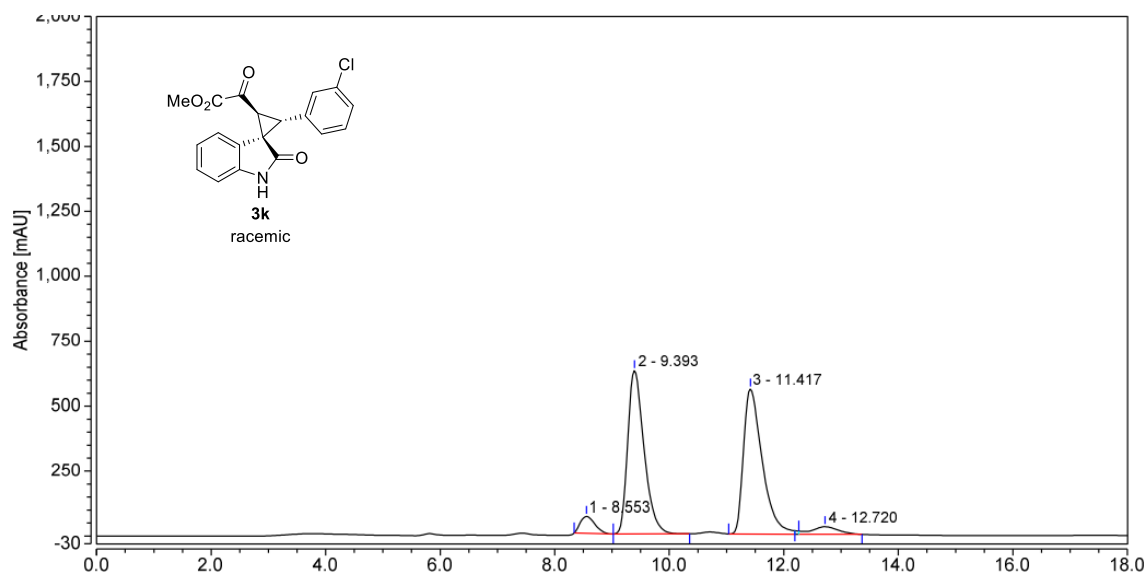

| Peak         | Retention Time<br>min | Area<br>mAU*min | Height<br>mAU   | Area<br>%     | Height<br>%   |
|--------------|-----------------------|-----------------|-----------------|---------------|---------------|
| 1            | 8.553                 | 19.290          | 65.150          | 4.23          | 5.08          |
| 2            | 9.393                 | 208.567         | 629.074         | 45.77         | 49.09         |
| 3            | 11.417                | 212.051         | 558.204         | 46.54         | 43.56         |
| 4            | 12.720                | 15.766          | 29.069          | 3.46          | 2.27          |
| <b>Total</b> |                       | <b>455.674</b>  | <b>1281.497</b> | <b>100.00</b> | <b>100.00</b> |

### HPLC Spectrum of 3k

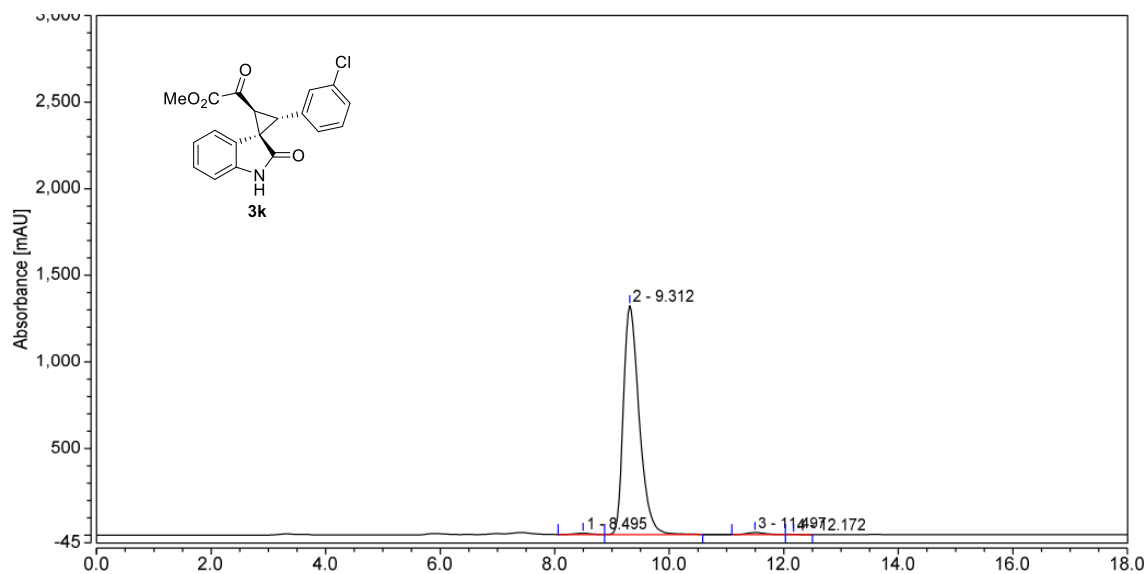

| Peak         | Retention Time<br>min | Area<br>mAU*min | Height<br>mAU   | Area<br>%     | Height<br>%   |
|--------------|-----------------------|-----------------|-----------------|---------------|---------------|
| 1            | 8.495                 | 2.416           | 7.400           | 0.56          | 0.55          |
| 2            | 9.312                 | 422.279         | 1321.567        | 98.39         | 98.53         |
| 3            | 11.497                | 4.299           | 11.718          | 1.00          | 0.87          |
| 4            | 12.172                | 0.181           | 0.622           | 0.04          | 0.05          |
| <b>Total</b> |                       | <b>429.175</b>  | <b>1341.307</b> | <b>100.00</b> | <b>100.00</b> |

### HPLC Spectrum of *ent*-3k

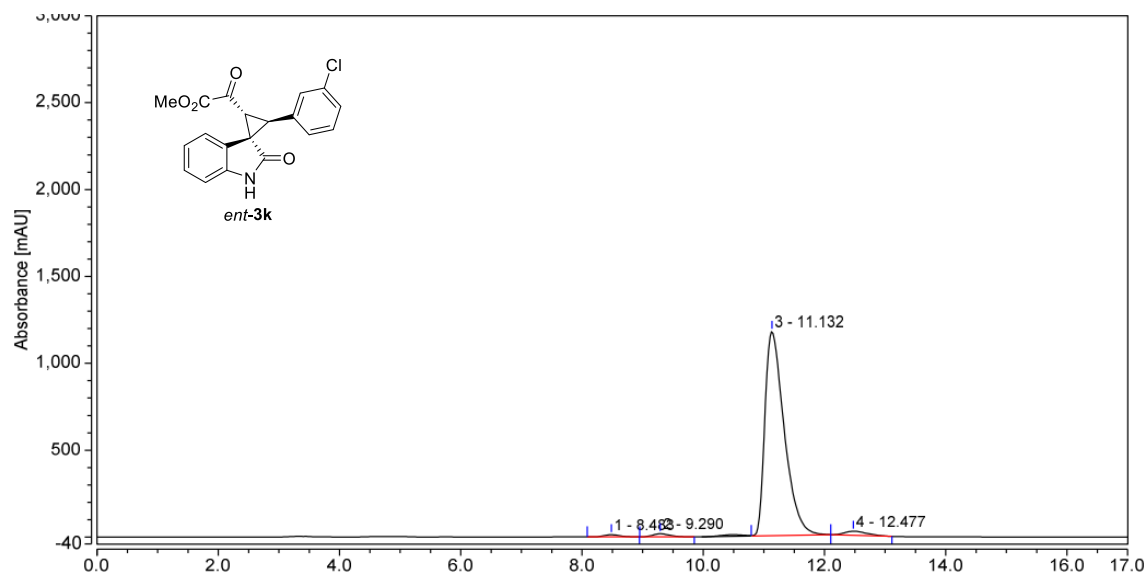

| Peak          | Retention Time<br>min | Area<br>mAU*min | Height<br>mAU   | Area<br>%     | Height<br>%   |
|---------------|-----------------------|-----------------|-----------------|---------------|---------------|
| 1             | 8.483                 | 3.675           | 12.591          | 0.81          | 1.02          |
| 2             | 9.290                 | 5.743           | 18.248          | 1.27          | 1.49          |
| 3             | 11.132                | 432.445         | 1174.583        | 95.69         | 95.61         |
| 4             | 12.477                | 10.039          | 23.148          | 2.22          | 1.88          |
| <b>Total:</b> |                       | <b>451.901</b>  | <b>1228.570</b> | <b>100.00</b> | <b>100.00</b> |

### HPLC Spectrum of 31

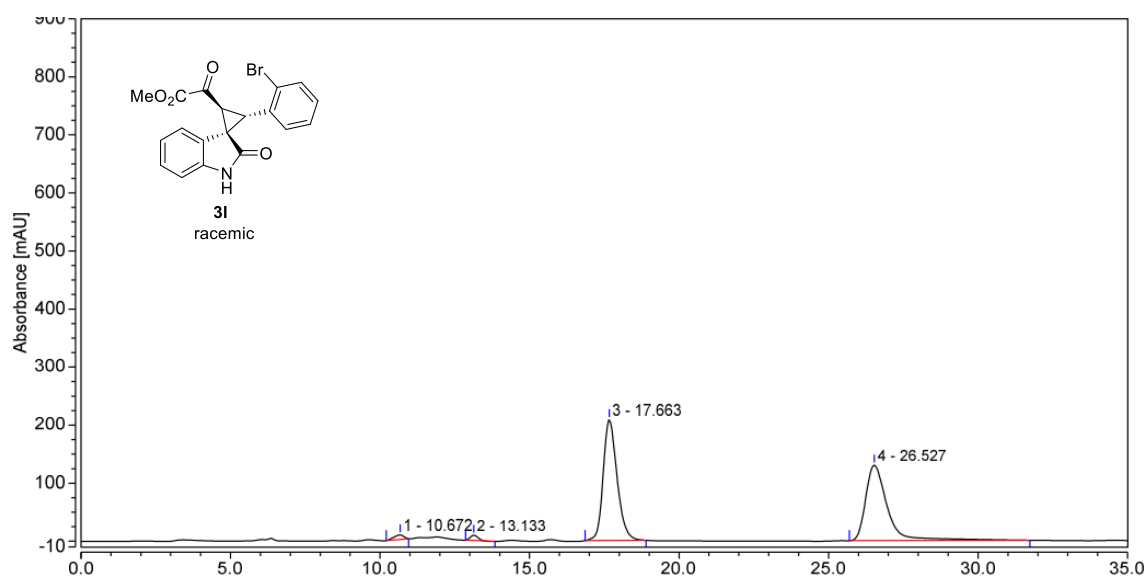

| Peak          | Retention Time<br>min | Area<br>mAU*min | Height<br>mAU  | Area<br>%     | Height<br>%   |
|---------------|-----------------------|-----------------|----------------|---------------|---------------|
| 1             | 10.672                | 3.061           | 7.855          | 1.34          | 2.21          |
| 2             | 13.133                | 2.610           | 8.923          | 1.15          | 2.51          |
| 3             | 17.663                | 112.254         | 208.091        | 49.29         | 58.64         |
| 4             | 26.527                | 109.834         | 130.003        | 48.22         | 36.63         |
| <b>Total:</b> |                       | <b>227.759</b>  | <b>354.872</b> | <b>100.00</b> | <b>100.00</b> |

### HPLC Spectrum of 31

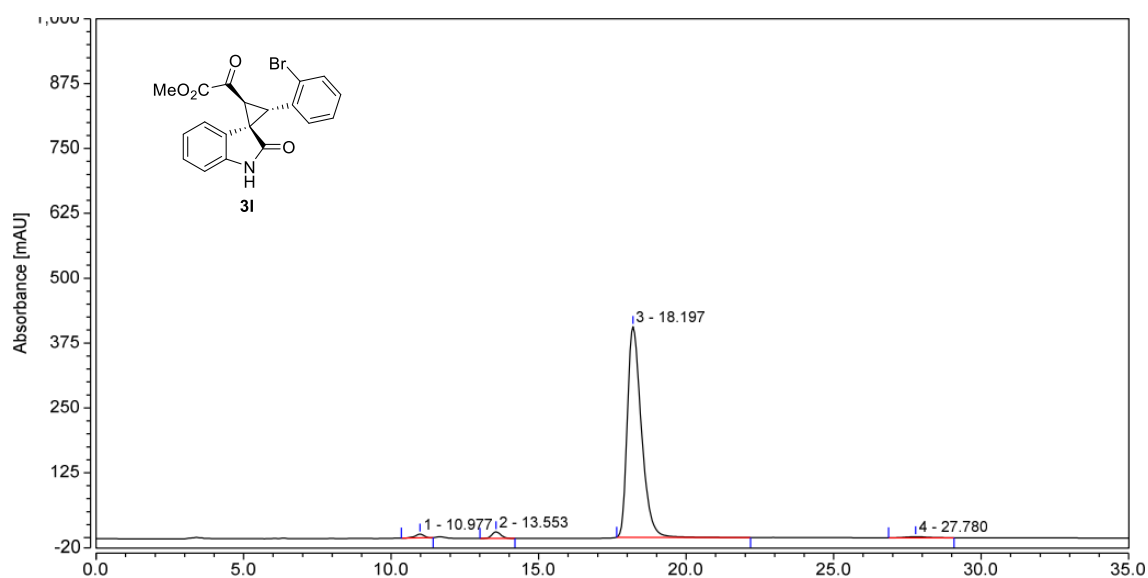

| Peak          | Retention Time<br>min | Area<br>mAU*min | Height<br>mAU  | Area<br>%     | Height<br>%   |
|---------------|-----------------------|-----------------|----------------|---------------|---------------|
| 1             | 10.977                | 2.473           | 7.168          | 1.06          | 1.67          |
| 2             | 13.553                | 4.470           | 12.645         | 1.91          | 2.95          |
| 3             | 18.197                | 225.104         | 406.187        | 96.28         | 94.87         |
| 4             | 27.780                | 1.749           | 2.154          | 0.75          | 0.50          |
| <b>Total:</b> |                       | <b>233.795</b>  | <b>428.154</b> | <b>100.00</b> | <b>100.00</b> |

### HPLC Spectrum of 3m

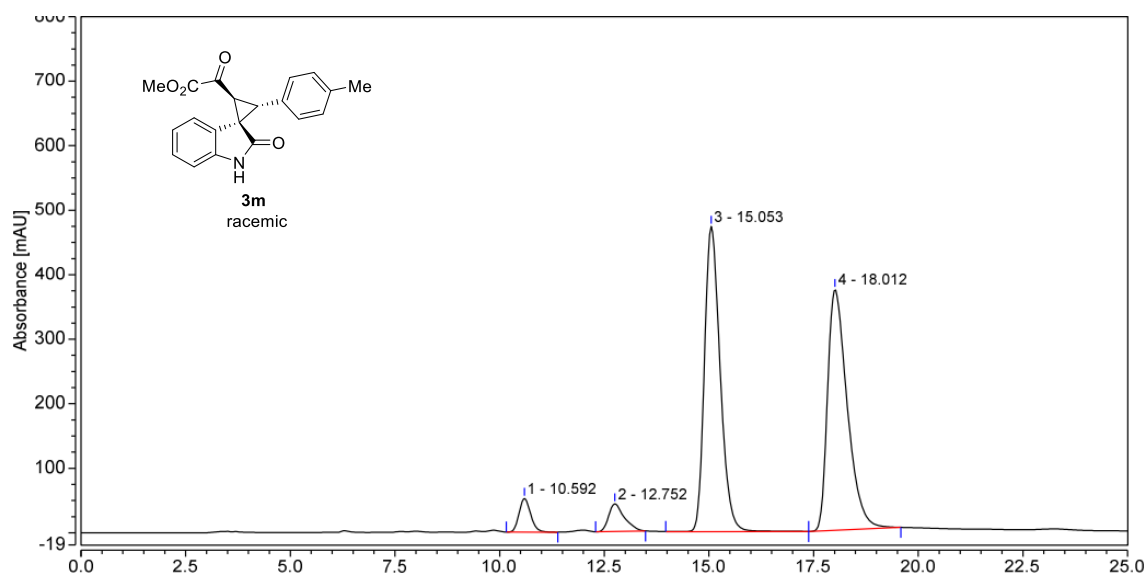

| Peak          | Retention Time<br>min | Area<br>mAU*min | Height<br>mAU  | Area<br>%     | Height<br>%   |
|---------------|-----------------------|-----------------|----------------|---------------|---------------|
| 1             | 10.592                | 16.734          | 52.218         | 3.76          | 5.55          |
| 2             | 12.752                | 18.451          | 42.681         | 4.15          | 4.53          |
| 3             | 15.053                | 206.503         | 473.288        | 46.40         | 50.27         |
| 4             | 18.012                | 203.398         | 373.306        | 45.70         | 39.65         |
| <b>Total:</b> |                       | <b>445.086</b>  | <b>941.493</b> | <b>100.00</b> | <b>100.00</b> |

### HPLC Spectrum of 3m

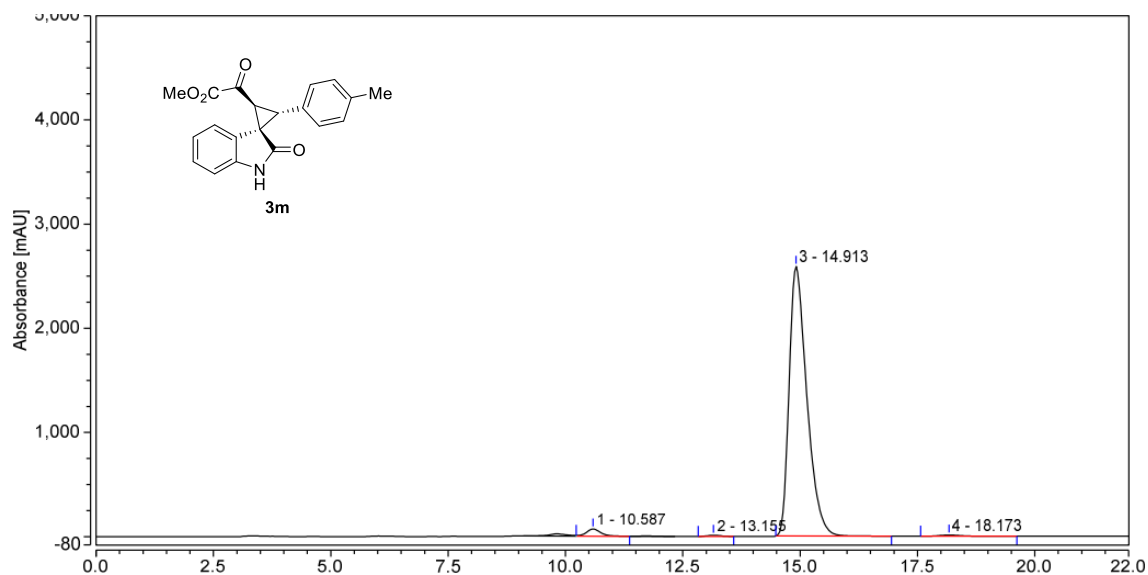

| Peak          | Retention Time<br>min | Area<br>mAU*min | Height<br>mAU   | Area<br>%     | Height<br>%   |
|---------------|-----------------------|-----------------|-----------------|---------------|---------------|
| 1             | 10.587                | 25.152          | 69.997          | 2.16          | 2.61          |
| 2             | 13.155                | 3.475           | 10.983          | 0.30          | 0.41          |
| 3             | 14.913                | 1131.946        | 2588.045        | 97.05         | 96.57         |
| 4             | 18.173                | 5.823           | 11.017          | 0.50          | 0.41          |
| <b>Total:</b> |                       | <b>1166.396</b> | <b>2680.042</b> | <b>100.00</b> | <b>100.00</b> |



### HPLC Spectrum of *ent*-3m

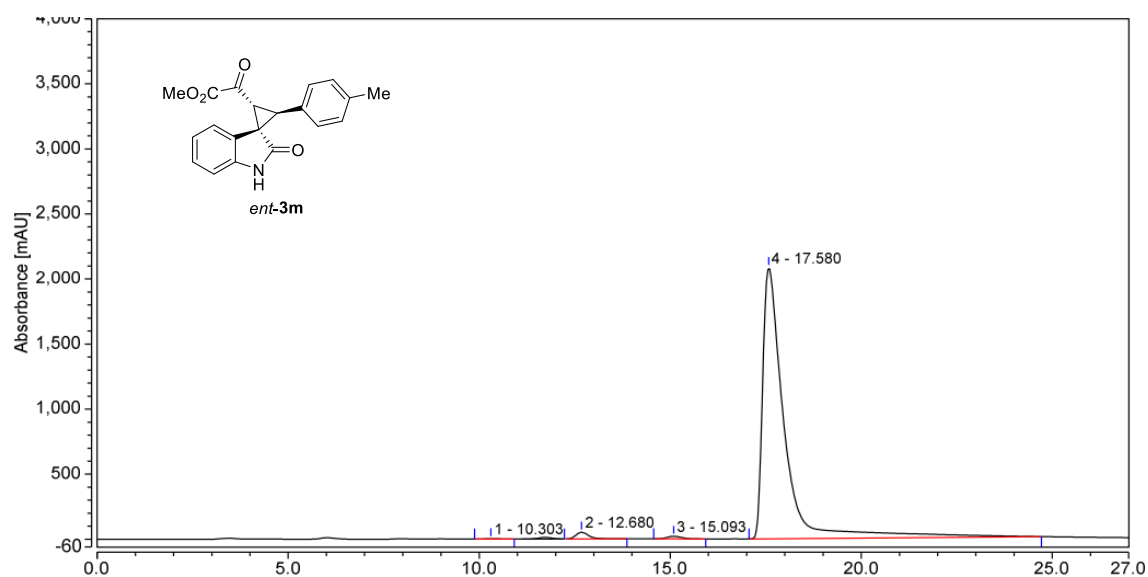

| Peak          | Retention Time<br>min | Area<br>mAU*min | Height<br>mAU   | Area<br>%     | Height<br>%   |
|---------------|-----------------------|-----------------|-----------------|---------------|---------------|
| 1             | 10.303                | 1.273           | 2.823           | 0.09          | 0.13          |
| 2             | 12.680                | 20.555          | 51.533          | 1.46          | 2.39          |
| 3             | 15.093                | 8.506           | 19.748          | 0.60          | 0.92          |
| 4             | 17.580                | 1378.142        | 2083.460        | 97.85         | 96.57         |
| <b>Total:</b> |                       | <b>1408.476</b> | <b>2157.565</b> | <b>100.00</b> | <b>100.00</b> |

### HPLC Spectrum of 3n

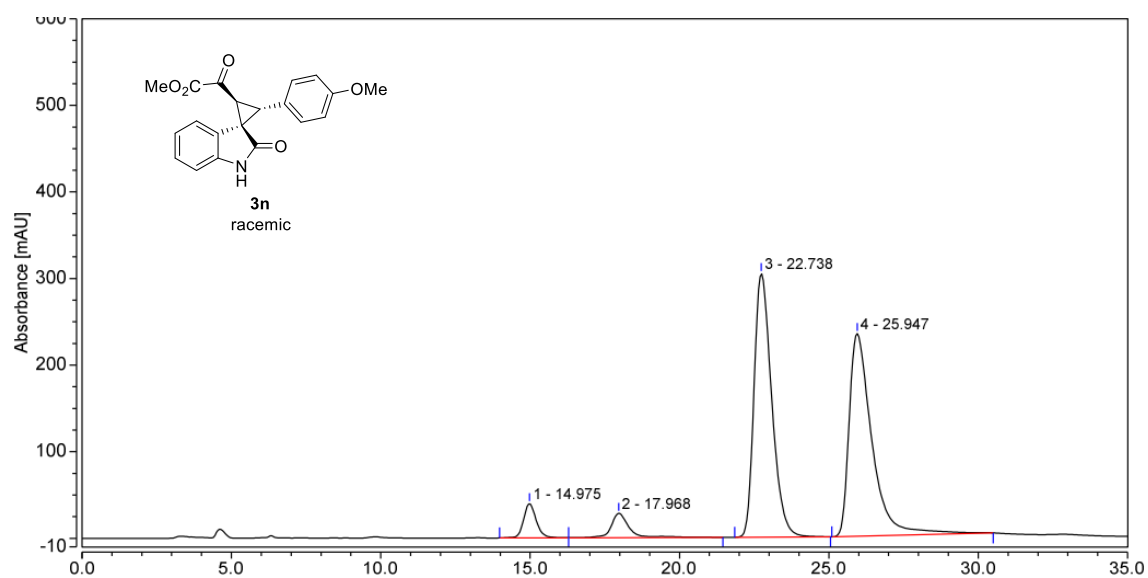

| Peak          | Retention Time<br>min | Area<br>mAU*min | Height<br>mAU  | Area<br>%     | Height<br>%   |
|---------------|-----------------------|-----------------|----------------|---------------|---------------|
| 1             | 14.975                | 19.419          | 39.501         | 4.27          | 6.52          |
| 2             | 17.968                | 19.575          | 28.059         | 4.31          | 4.63          |
| 3             | 22.738                | 208.382         | 304.266        | 45.84         | 50.23         |
| 4             | 25.947                | 207.180         | 233.933        | 45.58         | 38.62         |
| <b>Total:</b> |                       | <b>454.556</b>  | <b>605.759</b> | <b>100.00</b> | <b>100.00</b> |

### HPLC Spectrum of **3n**

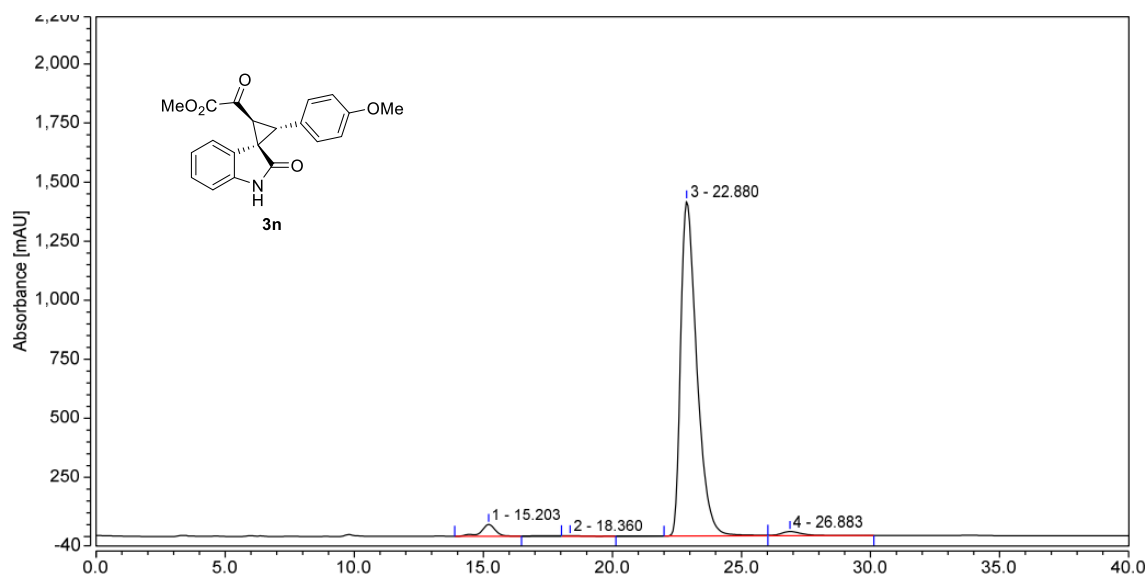

| Peak          | Retention Time<br>min | Area<br>mAU*min | Height<br>mAU   | Area<br>%     | Height<br>%   |
|---------------|-----------------------|-----------------|-----------------|---------------|---------------|
| 1             | 15.203                | 33.021          | 50.445          | 3.05          | 3.39          |
| 2             | 18.360                | 2.233           | 2.496           | 0.21          | 0.17          |
| 3             | 22.880                | 1028.630        | 1418.569        | 95.03         | 95.22         |
| 4             | 26.883                | 18.595          | 18.345          | 1.72          | 1.23          |
| <b>Total:</b> |                       | <b>1082.479</b> | <b>1489.855</b> | <b>100.00</b> | <b>100.00</b> |

### HPLC Spectrum of *ent*-**3n**

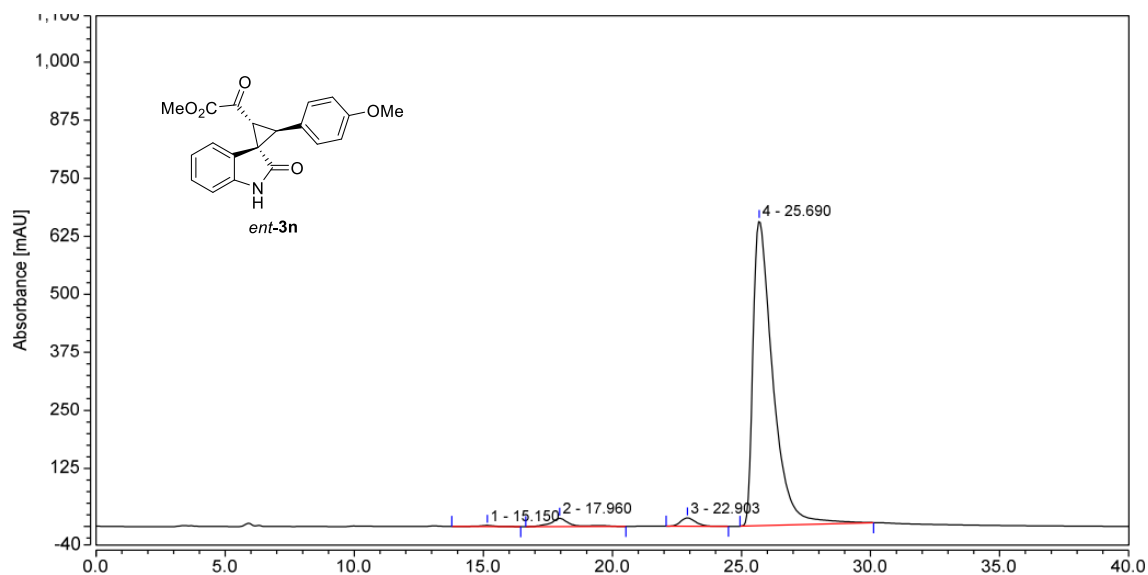

| Peak          | Retention Time<br>min | Area<br>mAU*min | Height<br>mAU  | Area<br>%     | Height<br>%   |
|---------------|-----------------------|-----------------|----------------|---------------|---------------|
| 1             | 15.150                | 1.806           | 2.408          | 0.29          | 0.35          |
| 2             | 17.960                | 14.868          | 17.585         | 2.42          | 2.53          |
| 3             | 22.903                | 12.175          | 17.908         | 1.98          | 2.58          |
| 4             | 25.690                | 585.795         | 657.273        | 95.31         | 94.55         |
| <b>Total:</b> |                       | <b>614.643</b>  | <b>695.175</b> | <b>100.00</b> | <b>100.00</b> |

### HPLC Spectrum of 3o

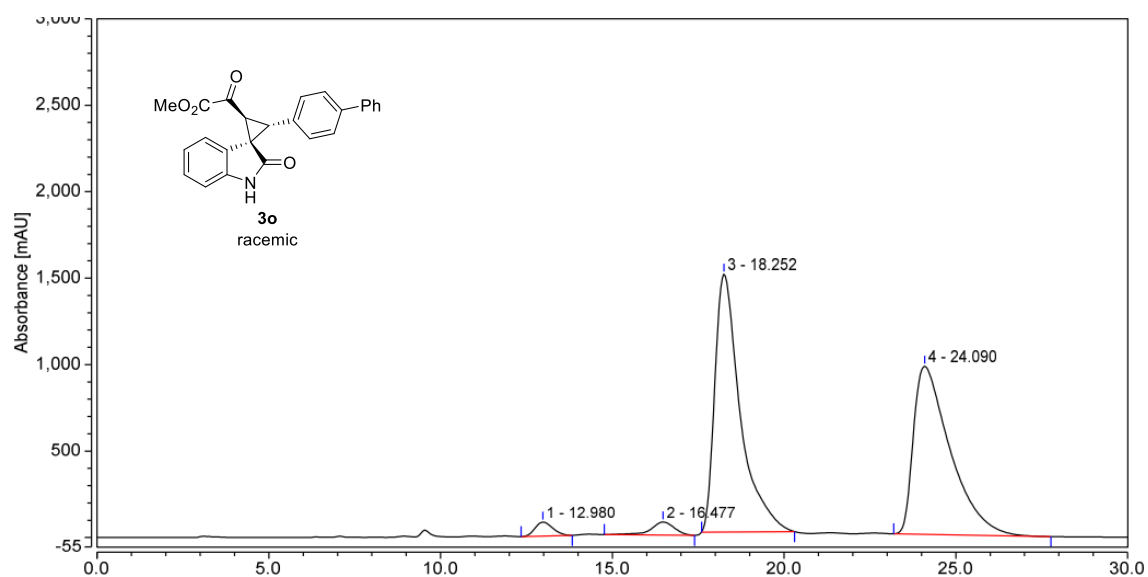

| Peak          | Retention Time<br>min | Area<br>mAU*min | Height<br>mAU   | Area<br>%     | Height<br>%   |
|---------------|-----------------------|-----------------|-----------------|---------------|---------------|
| 1             | 12.980                | 48.292          | 80.818          | 1.86          | 3.09          |
| 2             | 16.477                | 60.196          | 75.851          | 2.32          | 2.90          |
| 3             | 18.252                | 1275.697        | 1490.950        | 49.25         | 56.91         |
| 4             | 24.090                | 1205.911        | 972.028         | 46.56         | 37.11         |
| <b>Total:</b> |                       | <b>2590.096</b> | <b>2619.647</b> | <b>100.00</b> | <b>100.00</b> |

### HPLC Spectrum of 3o

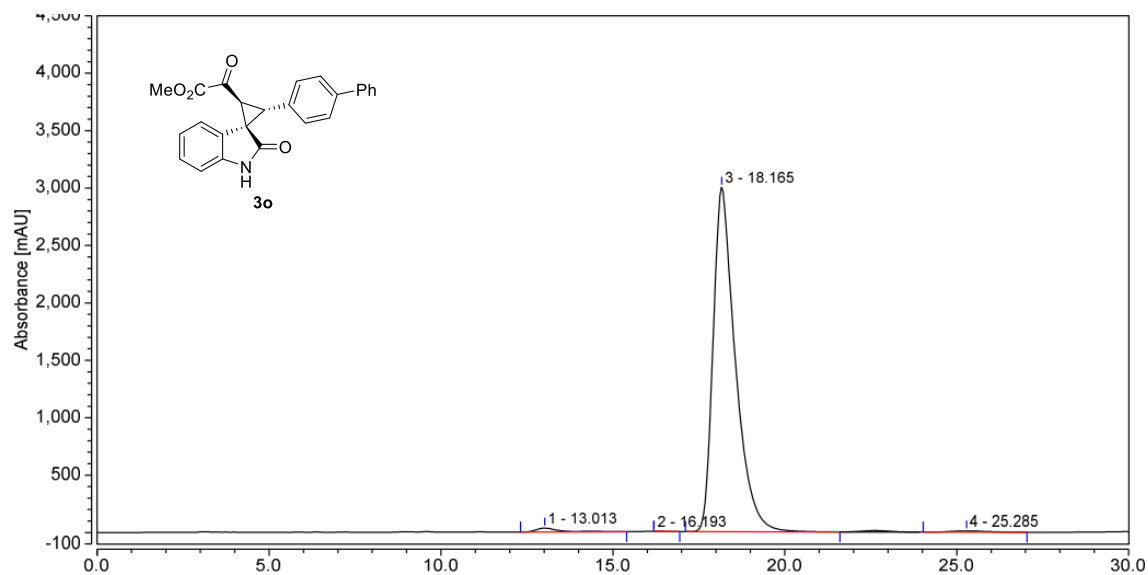

| Peak          | Retention Time<br>min | Area<br>mAU*min | Height<br>mAU   | Area<br>%     | Height<br>%   |
|---------------|-----------------------|-----------------|-----------------|---------------|---------------|
| 1             | 13.013                | 26.195          | 33.221          | 1.15          | 1.09          |
| 2             | 16.193                | 0.185           | 0.009           | 0.01          | 0.00          |
| 3             | 18.165                | 2240.363        | 3000.318        | 98.24         | 98.54         |
| 4             | 25.285                | 13.783          | 11.153          | 0.60          | 0.37          |
| <b>Total:</b> |                       | <b>2280.527</b> | <b>3044.701</b> | <b>100.00</b> | <b>100.00</b> |

### HPLC Spectrum of 3p

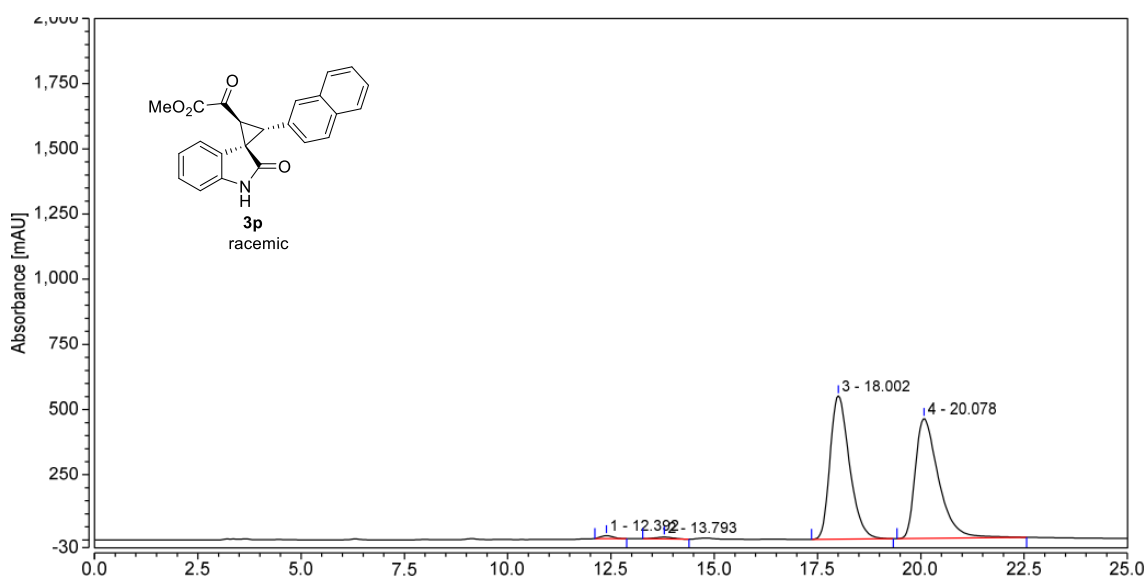

| Peak         | Retention Time<br>min | Area<br>mAU*min | Height<br>mAU   | Area<br>%     | Height<br>%   |
|--------------|-----------------------|-----------------|-----------------|---------------|---------------|
| 1            | 12.392                | 3.736           | 11.035          | 0.61          | 1.07          |
| 2            | 13.793                | 3.324           | 6.808           | 0.55          | 0.66          |
| 3            | 18.002                | 300.635         | 549.862         | 49.48         | 53.51         |
| 4            | 20.078                | 299.930         | 459.870         | 49.36         | 44.75         |
| <b>Total</b> |                       | <b>607.625</b>  | <b>1027.576</b> | <b>100.00</b> | <b>100.00</b> |

### HPLC Spectrum of 3p

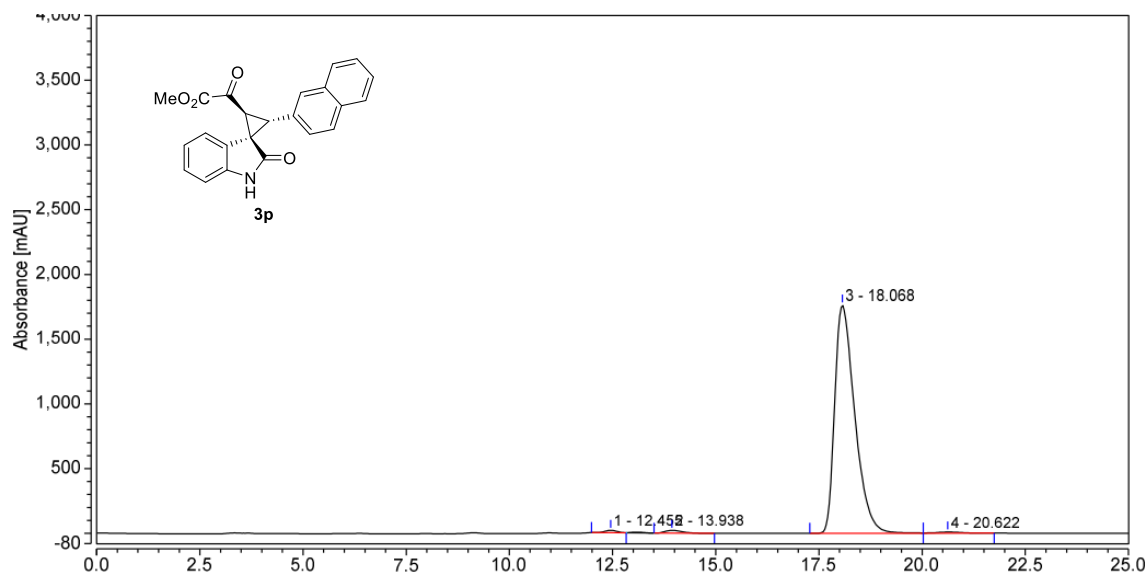

| Peak         | Retention Time<br>min | Area<br>mAU*min | Height<br>mAU   | Area<br>%     | Height<br>%   |
|--------------|-----------------------|-----------------|-----------------|---------------|---------------|
| 1            | 12.455                | 6.561           | 18.825          | 0.64          | 1.04          |
| 2            | 13.938                | 11.101          | 22.703          | 1.09          | 1.25          |
| 3            | 18.068                | 995.333         | 1762.691        | 97.63         | 97.21         |
| 4            | 20.622                | 6.524           | 8.995           | 0.64          | 0.50          |
| <b>Total</b> |                       | <b>1019.519</b> | <b>1813.214</b> | <b>100.00</b> | <b>100.00</b> |

### HPLC Spectrum of 3q

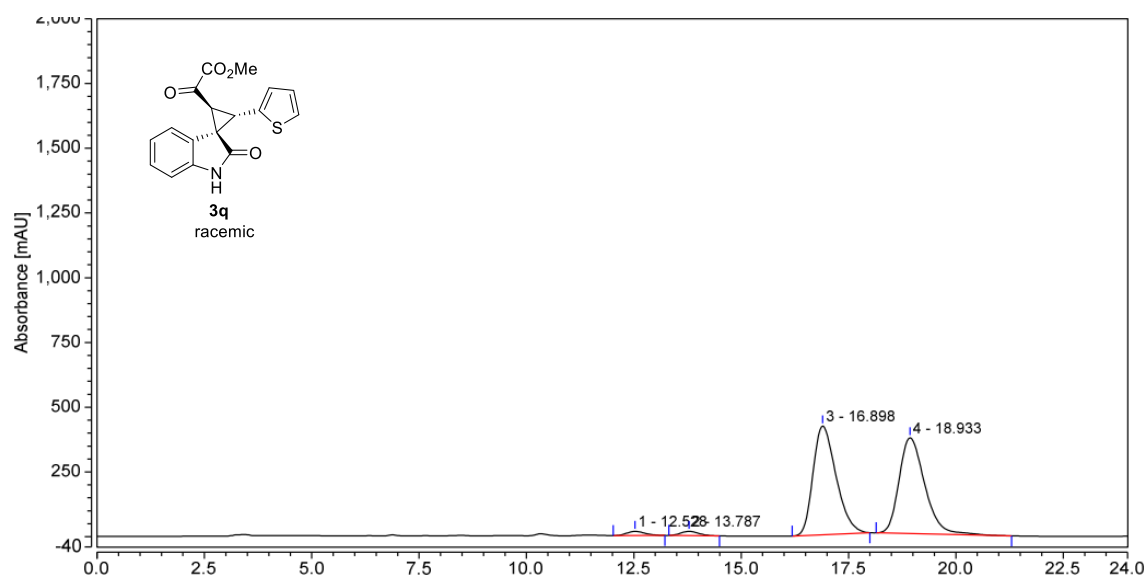

| Peak          | Retention Time<br>min | Area<br>mAU*min | Height<br>mAU  | Area<br>%     | Height<br>%   |
|---------------|-----------------------|-----------------|----------------|---------------|---------------|
| 1             | 12.528                | 7.918           | 16.065         | 1.48          | 1.95          |
| 2             | 13.787                | 7.951           | 16.445         | 1.49          | 2.00          |
| 3             | 16.898                | 261.292         | 419.874        | 48.95         | 51.05         |
| 4             | 18.933                | 256.684         | 370.094        | 48.08         | 45.00         |
| <b>Total:</b> |                       | <b>533.845</b>  | <b>822.480</b> | <b>100.00</b> | <b>100.00</b> |

### HPLC Spectrum of 3q

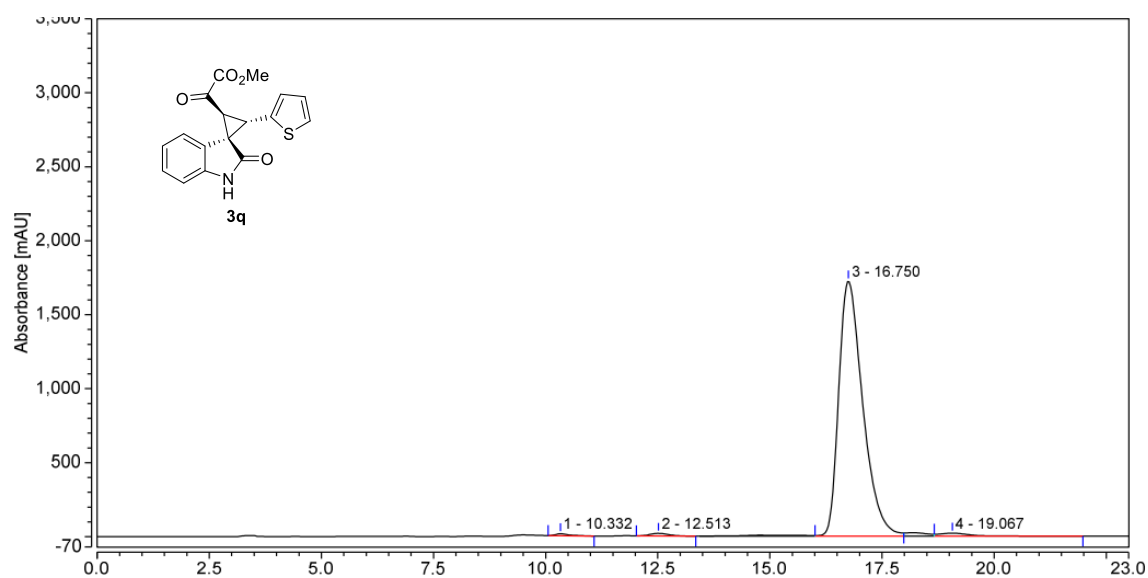

| Peak          | Retention Time<br>min | Area<br>mAU*min | Height<br>mAU   | Area<br>%     | Height<br>%   |
|---------------|-----------------------|-----------------|-----------------|---------------|---------------|
| 1             | 10.332                | 4.735           | 13.286          | 0.43          | 0.75          |
| 2             | 12.513                | 8.522           | 17.513          | 0.77          | 0.99          |
| 3             | 16.750                | 1070.053        | 1724.310        | 97.20         | 97.09         |
| 4             | 19.067                | 17.555          | 20.810          | 1.59          | 1.17          |
| <b>Total:</b> |                       | <b>1100.865</b> | <b>1775.919</b> | <b>100.00</b> | <b>100.00</b> |

### HPLC Spectrum of 3r

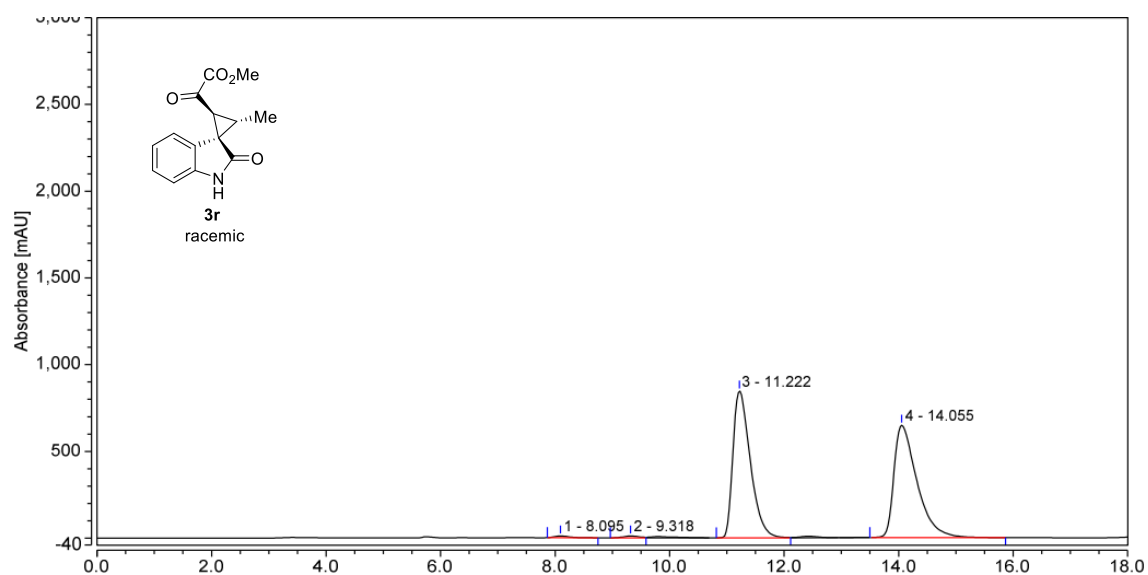

| Peak          | Retention Time<br>min | Area<br>mAU*min | Height<br>mAU   | Area<br>%     | Height<br>%   |
|---------------|-----------------------|-----------------|-----------------|---------------|---------------|
| 1             | 8.095                 | 2.945           | 9.459           | 0.49          | 0.62          |
| 2             | 9.318                 | 3.179           | 10.291          | 0.52          | 0.68          |
| 3             | 11.222                | 297.409         | 846.008         | 49.11         | 55.88         |
| 4             | 14.055                | 302.109         | 648.164         | 49.88         | 42.81         |
| <b>Total:</b> |                       | <b>605.642</b>  | <b>1513.922</b> | <b>100.00</b> | <b>100.00</b> |

### HPLC Spectrum of 3r

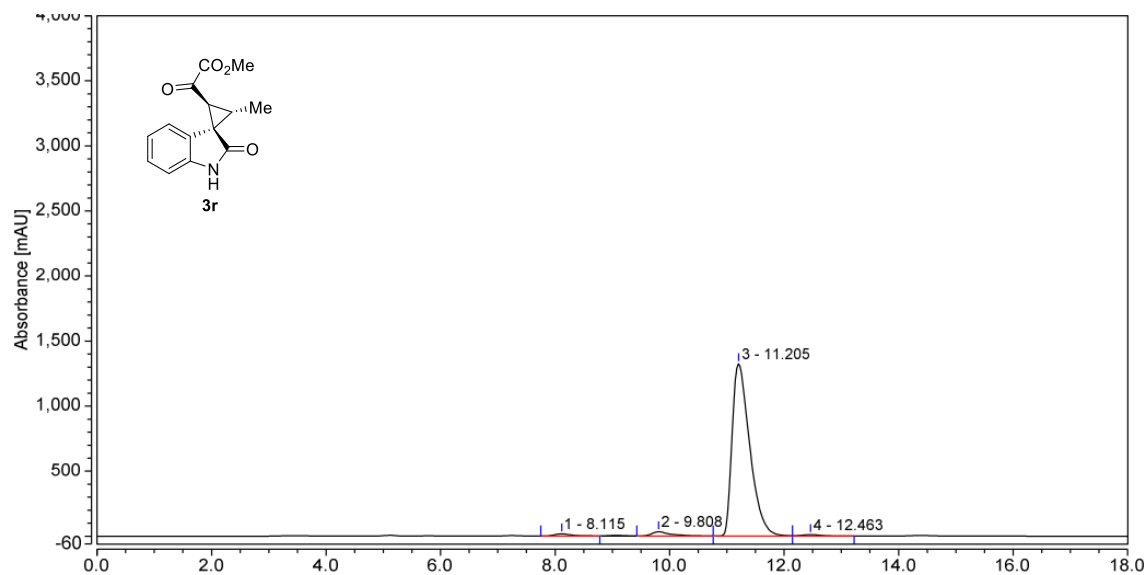

| Peak          | Retention Time<br>min | Area<br>mAU*min | Height<br>mAU   | Area<br>%     | Height<br>%   |
|---------------|-----------------------|-----------------|-----------------|---------------|---------------|
| 1             | 8.115                 | 6.117           | 17.286          | 1.23          | 1.25          |
| 2             | 9.808                 | 13.219          | 33.065          | 2.66          | 2.38          |
| 3             | 11.205                | 473.939         | 1325.185        | 95.21         | 95.56         |
| 4             | 12.463                | 4.513           | 11.212          | 0.91          | 0.81          |
| <b>Total:</b> |                       | <b>497.788</b>  | <b>1386.747</b> | <b>100.00</b> | <b>100.00</b> |

### HPLC Spectrum of *ent*-3r

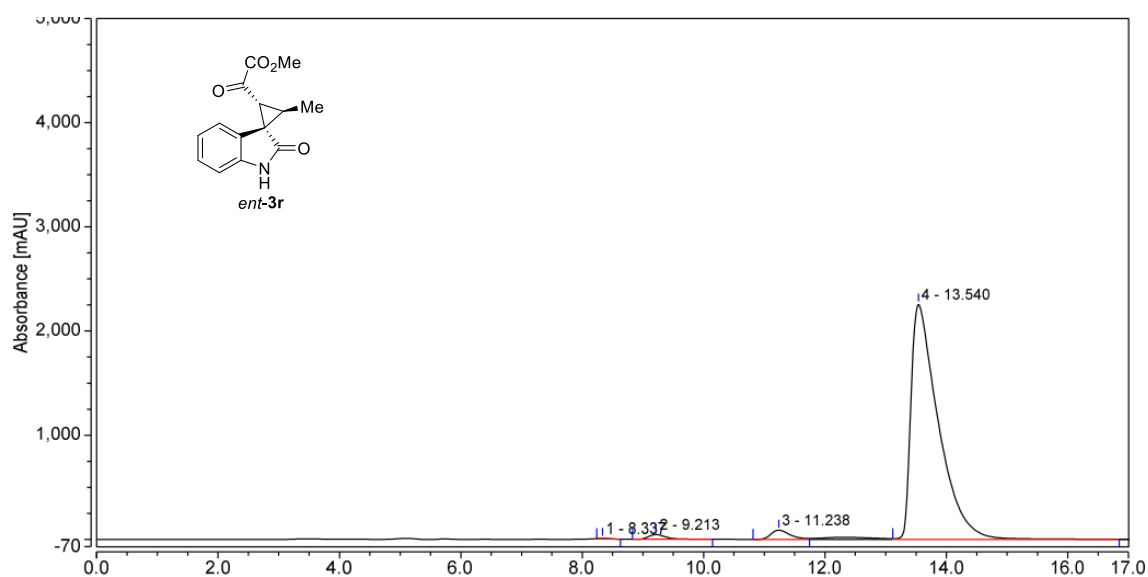

| Peak         | Retention Time<br>min | Area<br>mAU*min | Height<br>mAU   | Area<br>%     | Height<br>%   |
|--------------|-----------------------|-----------------|-----------------|---------------|---------------|
| 1            | 8.337                 | 0.766           | 3.429           | 0.06          | 0.14          |
| 2            | 9.213                 | 15.368          | 45.506          | 1.25          | 1.90          |
| 3            | 11.238                | 32.390          | 88.902          | 2.64          | 3.71          |
| 4            | 13.540                | 1178.235        | 2259.194        | 96.04         | 94.25         |
| <b>Total</b> |                       | <b>1226.760</b> | <b>2397.032</b> | <b>100.00</b> | <b>100.00</b> |

### HPLC Spectrum of 6a

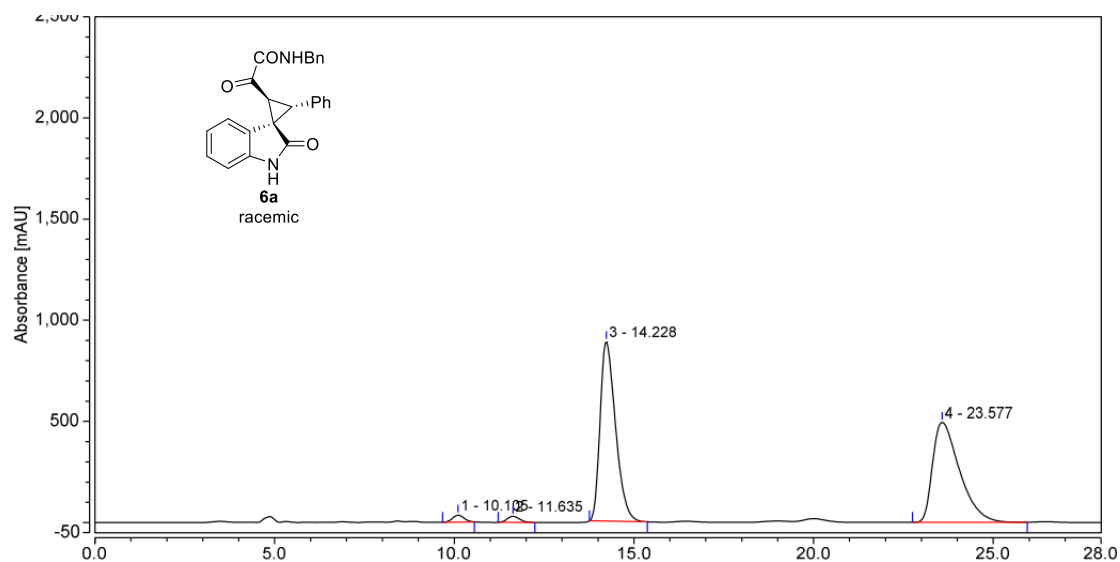

| Peak         | Retention Time<br>min | Area<br>mAU*min | Height<br>mAU   | Area<br>%     | Height<br>%   |
|--------------|-----------------------|-----------------|-----------------|---------------|---------------|
| 1            | 10.105                | 12.873          | 34.544          | 1.43          | 2.39          |
| 2            | 11.635                | 11.914          | 30.372          | 1.33          | 2.10          |
| 3            | 14.228                | 442.511         | 887.934         | 49.30         | 61.35         |
| 4            | 23.577                | 430.200         | 494.569         | 47.93         | 34.17         |
| <b>Total</b> |                       | <b>897.498</b>  | <b>1447.420</b> | <b>100.00</b> | <b>100.00</b> |

### HPLC Spectrum of 6a

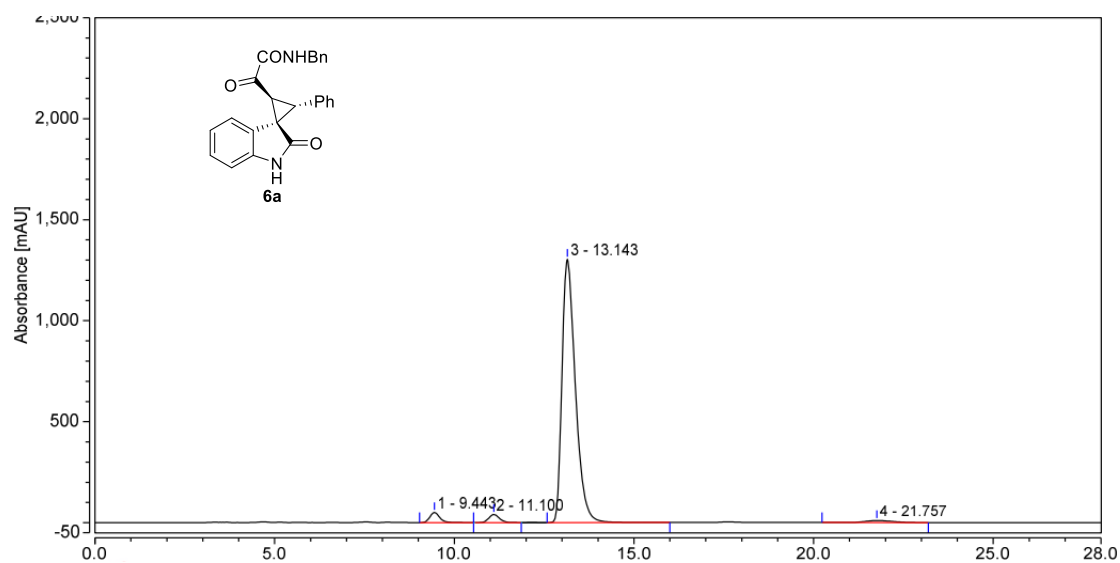

| Peak         | Retention Time<br>min | Area<br>mAU*min | Height<br>mAU   | Area<br>%     | Height<br>%   |
|--------------|-----------------------|-----------------|-----------------|---------------|---------------|
| 1            | 9.443                 | 16.225          | 49.966          | 2.70          | 3.56          |
| 2            | 11.100                | 14.067          | 40.154          | 2.34          | 2.86          |
| 3            | 13.143                | 562.766         | 1303.241        | 93.50         | 92.87         |
| 4            | 21.757                | 8.808           | 10.007          | 1.46          | 0.71          |
| <b>Total</b> |                       | <b>601.866</b>  | <b>1403.368</b> | <b>100.00</b> | <b>100.00</b> |

### HPLC Spectrum of 6b

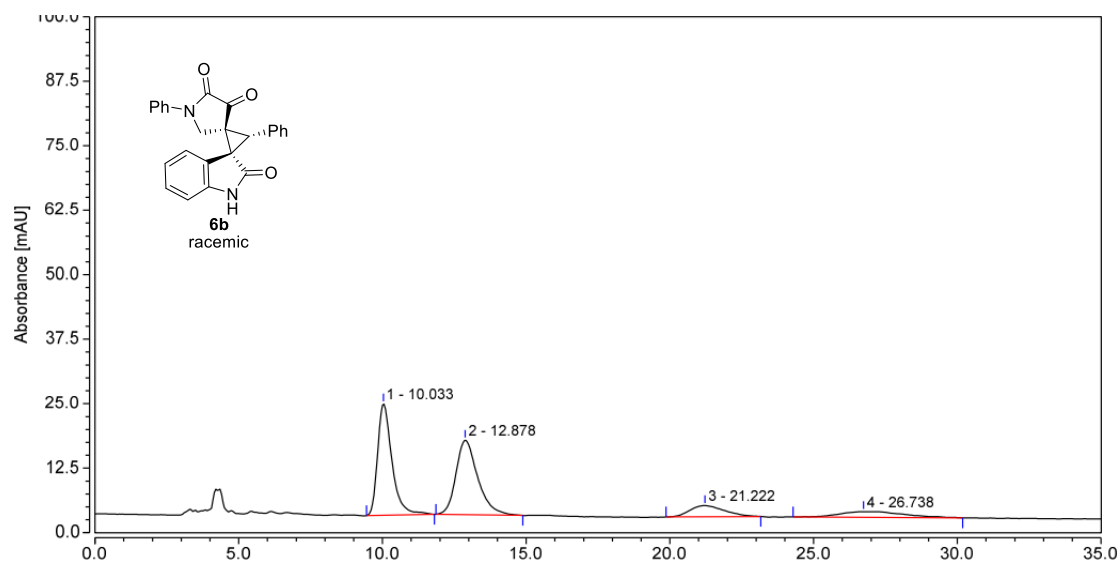

| Peak         | Retention Time<br>min | Area<br>mAU*min | Height<br>mAU | Area<br>%     | Height<br>%   |
|--------------|-----------------------|-----------------|---------------|---------------|---------------|
| 1            | 10.033                | 12.547          | 21.604        | 39.84         | 54.85         |
| 2            | 12.878                | 12.693          | 14.430        | 40.31         | 36.63         |
| 3            | 21.222                | 3.314           | 2.240         | 10.52         | 5.69          |
| 4            | 26.738                | 2.937           | 1.117         | 9.33          | 2.83          |
| <b>Total</b> |                       | <b>31.491</b>   | <b>39.390</b> | <b>100.00</b> | <b>100.00</b> |



### HPLC Spectrum of **6b**

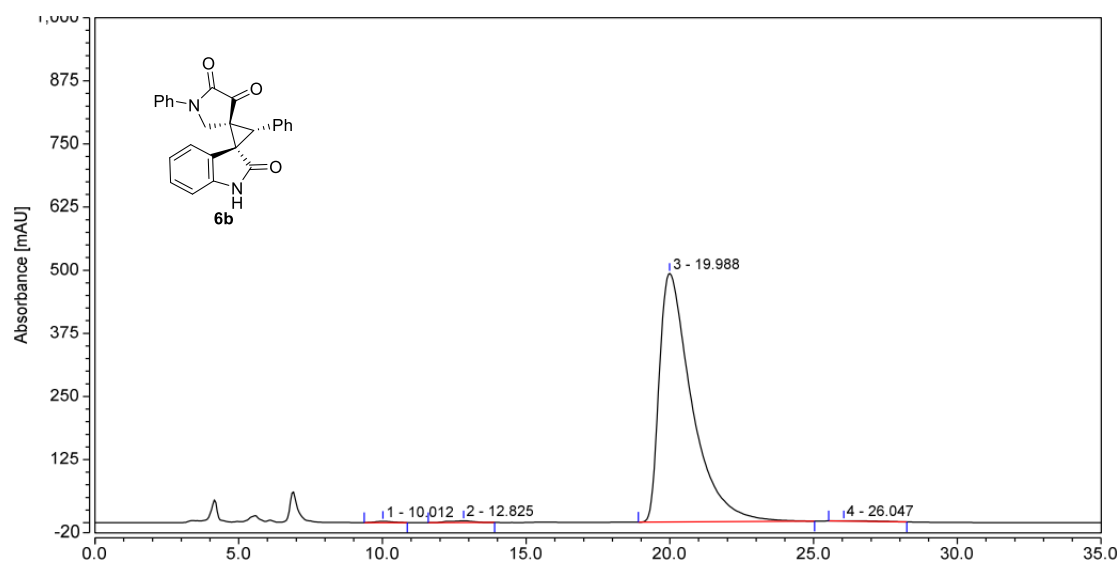

| Peak         | Retention Time<br>min | Area<br>mAU*min | Height<br>mAU  | Area<br>%     | Height<br>%   |
|--------------|-----------------------|-----------------|----------------|---------------|---------------|
| 1            | 10.012                | 1.654           | 2.608          | 0.25          | 0.52          |
| 2            | 12.825                | 3.518           | 3.538          | 0.54          | 0.71          |
| 3            | 19.988                | 645.205         | 492.583        | 98.97         | 98.61         |
| 4            | 26.047                | 1.532           | 0.773          | 0.23          | 0.15          |
| <b>Total</b> |                       | <b>651.909</b>  | <b>499.501</b> | <b>100.00</b> | <b>100.00</b> |

### HPLC Spectrum of **6c**

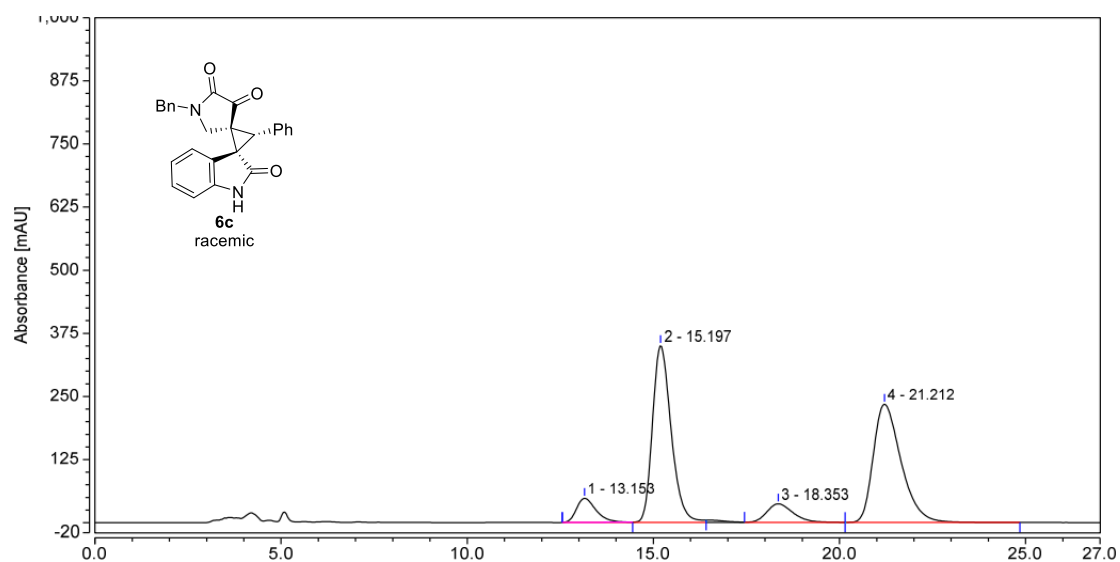

| Peak         | Retention Time<br>min | Area<br>mAU*min | Height<br>mAU  | Area<br>%     | Height<br>%   |
|--------------|-----------------------|-----------------|----------------|---------------|---------------|
| 1            | 13.153                | 28.790          | 47.672         | 6.16          | 7.12          |
| 2            | 15.197                | 204.668         | 350.351        | 43.79         | 52.35         |
| 3            | 18.353                | 30.700          | 36.915         | 6.57          | 5.52          |
| 4            | 21.212                | 203.176         | 234.311        | 43.48         | 35.01         |
| <b>Total</b> |                       | <b>467.334</b>  | <b>669.249</b> | <b>100.00</b> | <b>100.00</b> |

### HPLC Spectrum of 6c

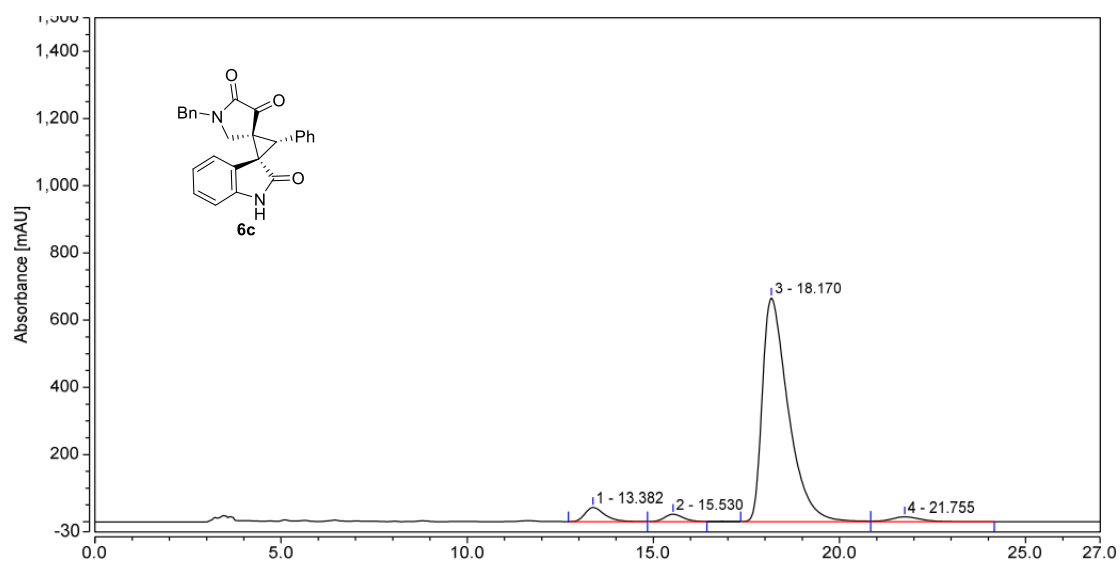

| Peak         | Retention Time<br>min | Area<br>mAU*min | Height<br>mAU  | Area<br>%     | Height<br>%   |
|--------------|-----------------------|-----------------|----------------|---------------|---------------|
| 1            | 13.382                | 26.086          | 42.333         | 4.41          | 5.68          |
| 2            | 15.530                | 13.255          | 22.146         | 2.24          | 2.97          |
| 3            | 18.170                | 537.801         | 665.749        | 90.99         | 89.39         |
| 4            | 21.755                | 13.913          | 14.563         | 2.35          | 1.96          |
| <b>Total</b> |                       | <b>591.055</b>  | <b>744.790</b> | <b>100.00</b> | <b>100.00</b> |

### HPLC Spectrum of 8a

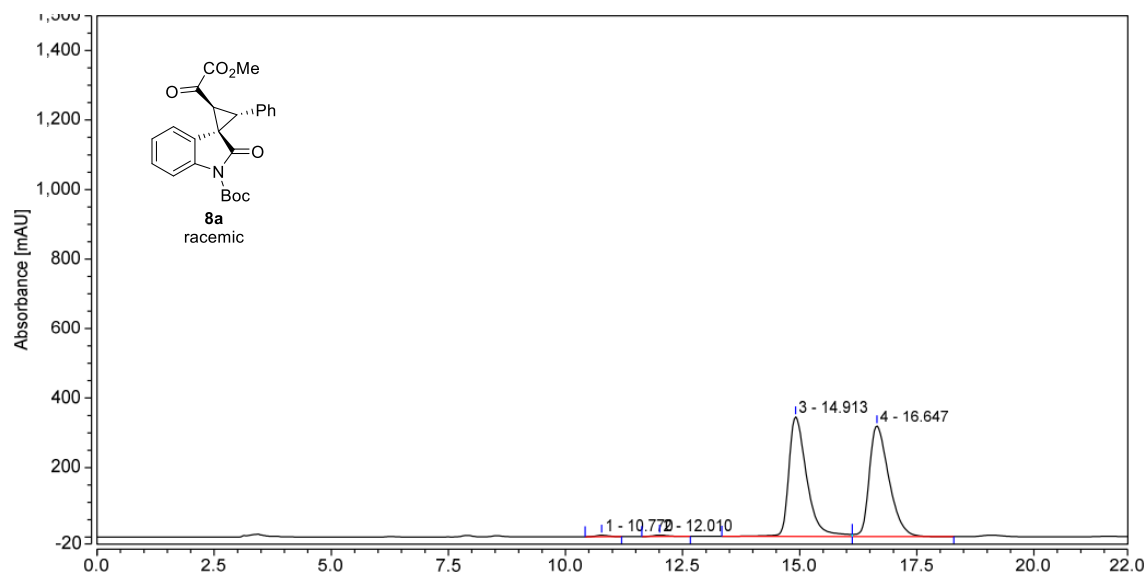

| Peak          | Retention Time<br>min | Area<br>mAU*min | Height<br>mAU  | Area<br>%     | Height<br>%   |
|---------------|-----------------------|-----------------|----------------|---------------|---------------|
| 1             | 10.770                | 1.197           | 4.022          | 0.39          | 0.60          |
| 2             | 12.010                | 1.341           | 3.837          | 0.43          | 0.57          |
| 3             | 14.913                | 153.076         | 343.861        | 49.35         | 51.32         |
| 4             | 16.647                | 154.566         | 318.265        | 49.83         | 47.50         |
| <b>Total:</b> |                       | <b>310.180</b>  | <b>669.986</b> | <b>100.00</b> | <b>100.00</b> |

### HPLC Spectrum of 8a

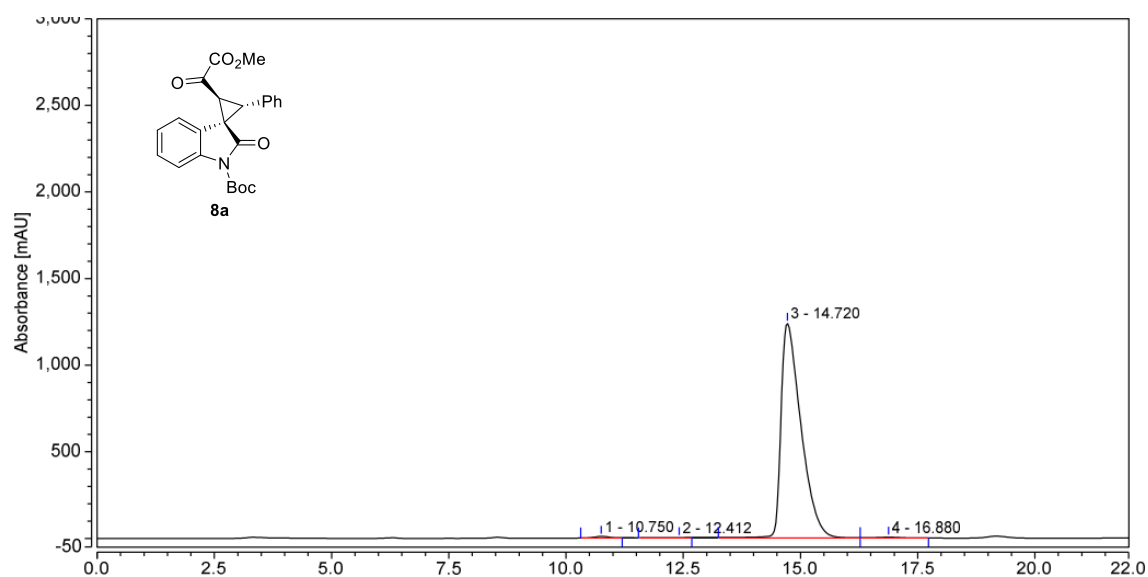

| Peak          | Retention Time<br>min | Area<br>mAU*min | Height<br>mAU   | Area<br>%     | Height<br>%   |
|---------------|-----------------------|-----------------|-----------------|---------------|---------------|
| 1             | 10.750                | 3.846           | 10.117          | 0.62          | 0.80          |
| 2             | 12.412                | 2.460           | 2.751           | 0.39          | 0.22          |
| 3             | 14.720                | 614.123         | 1239.953        | 98.48         | 98.58         |
| 4             | 16.880                | 3.155           | 4.949           | 0.51          | 0.39          |
| <b>Total:</b> |                       | <b>623.585</b>  | <b>1257.770</b> | <b>100.00</b> | <b>100.00</b> |

### HPLC Spectrum of 10a

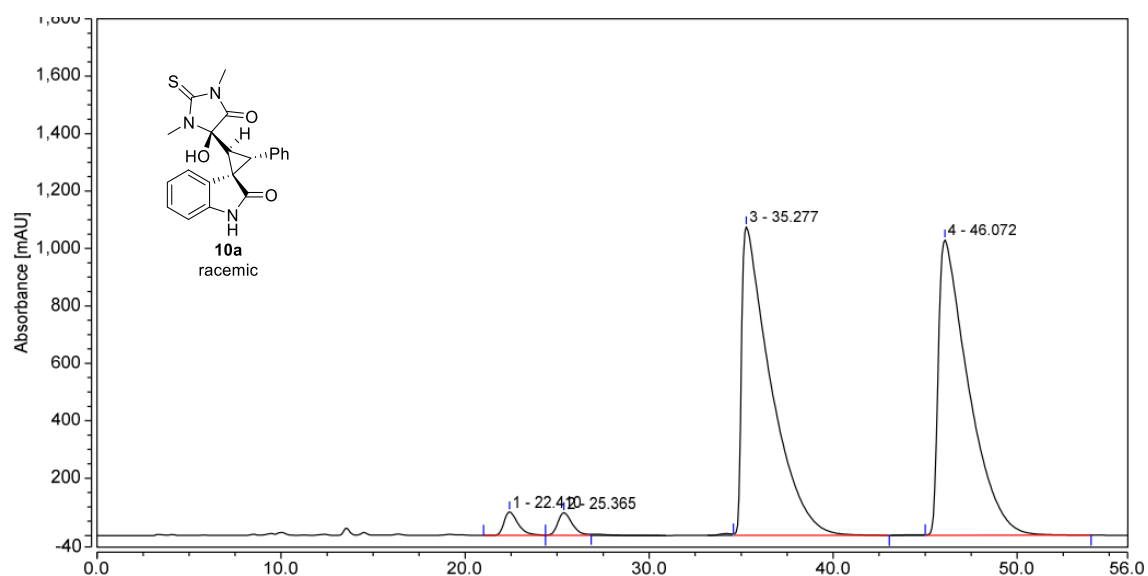

| Peak          | Retention Time<br>min | Area<br>mAU*min | Height<br>mAU   | Area<br>%     | Height<br>%   |
|---------------|-----------------------|-----------------|-----------------|---------------|---------------|
| 1             | 22.410                | 73.529          | 82.162          | 1.81          | 3.63          |
| 2             | 25.365                | 72.524          | 78.873          | 1.79          | 3.48          |
| 3             | 35.277                | 1962.879        | 1074.605        | 48.40         | 47.46         |
| 4             | 46.072                | 1946.301        | 1028.626        | 47.99         | 45.43         |
| <b>Total:</b> |                       | <b>4055.234</b> | <b>2264.266</b> | <b>100.00</b> | <b>100.00</b> |

### HPLC Spectrum of 10a

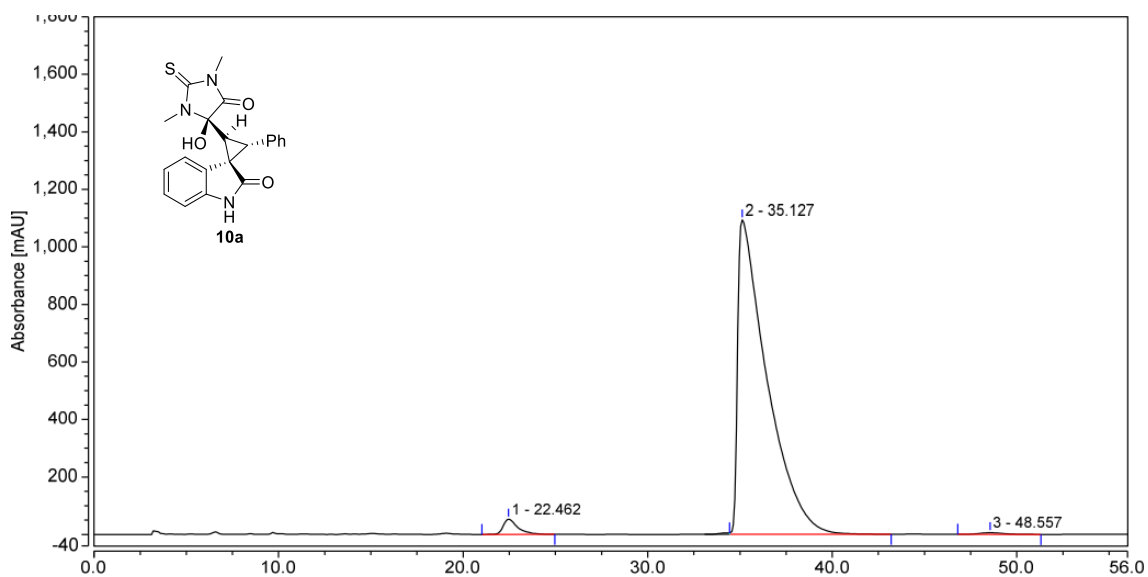

| Peak          | Retention Time<br>min | Area<br>mAU*min | Height<br>mAU   | Area<br>%     | Height<br>%   |
|---------------|-----------------------|-----------------|-----------------|---------------|---------------|
| 1             | 22.462                | 47.871          | 52.658          | 2.32          | 4.57          |
| 2             | 35.127                | 2004.918        | 1093.469        | 97.27         | 94.93         |
| 3             | 48.557                | 8.426           | 5.753           | 0.41          | 0.50          |
| <b>Total:</b> |                       | <b>2061.215</b> | <b>1151.879</b> | <b>100.00</b> | <b>100.00</b> |

### HPLC Spectrum of 11a

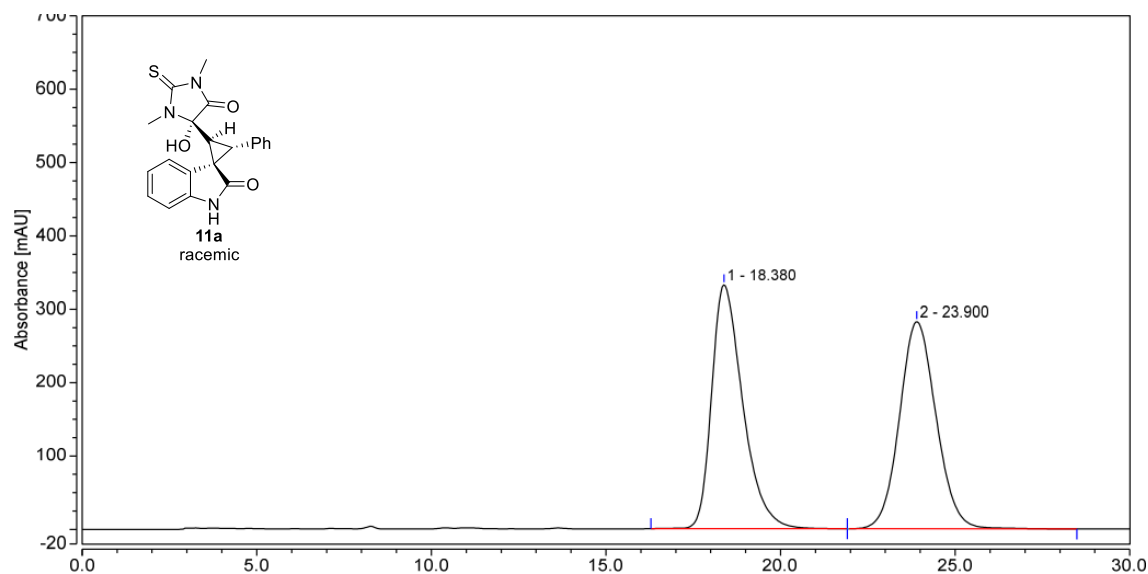

| Peak          | Retention Time<br>min | Area<br>mAU*min | Height<br>mAU  | Area<br>%     | Height<br>%   |
|---------------|-----------------------|-----------------|----------------|---------------|---------------|
| 1             | 18.380                | 343.193         | 332.392        | 49.92         | 54.07         |
| 2             | 23.900                | 344.254         | 282.318        | 50.08         | 45.93         |
| <b>Total:</b> |                       | <b>687.447</b>  | <b>614.710</b> | <b>100.00</b> | <b>100.00</b> |

### HPLC Spectrum of 11a

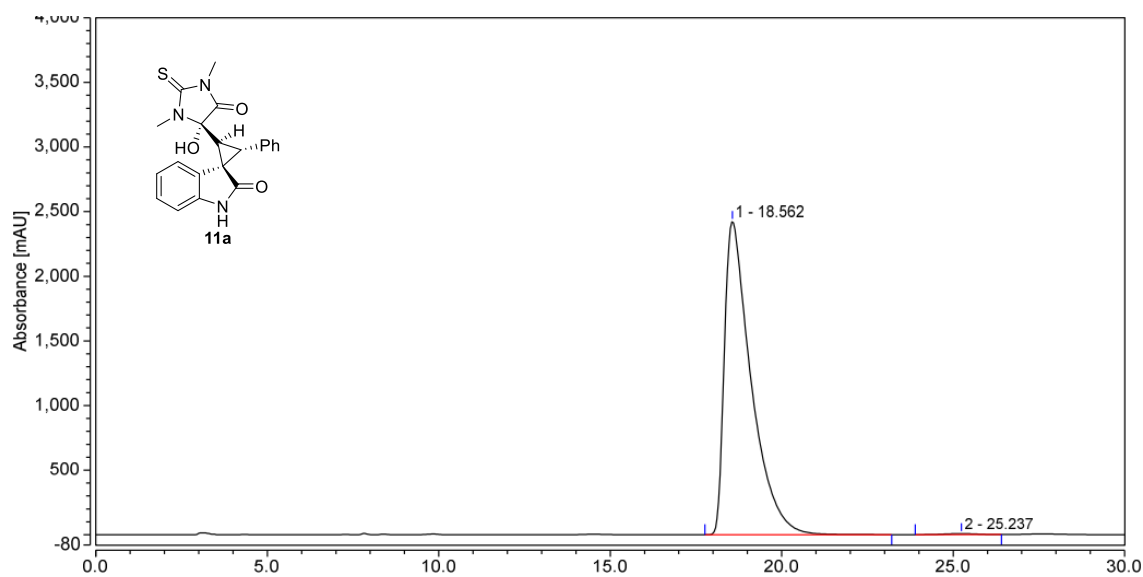

| Peak          | Retention Time<br>min | Area<br>mAU*min | Height<br>mAU   | Area<br>%     | Height<br>%   |
|---------------|-----------------------|-----------------|-----------------|---------------|---------------|
| 1             | 18.562                | 2184.365        | 2423.788        | 99.62         | 99.68         |
| 2             | 25.237                | 8.405           | 7.840           | 0.38          | 0.32          |
| <b>Total:</b> |                       | <b>2192.770</b> | <b>2431.628</b> | <b>100.00</b> | <b>100.00</b> |

## Quantum chemical calculations

The exchange and correlation electronic effects were considered by employing the density functional theory (DFT)<sup>11</sup> with Gaussian 16 program<sup>12</sup>. The ultrafine grid (99,590), having 99 radial shells and 590 angular points per shell, was used to evaluate the numerical integration accuracy. Geometry optimizations were performed at M06-2X-D3<sup>13</sup> level of theory with the double-zeta basis set Def2-SVP<sup>14</sup>. The harmonic vibrational frequencies were analyzed after the geometry optimizations to characterize the nature of the stationary point as a minimum with all positive frequencies at the same theoretical level.

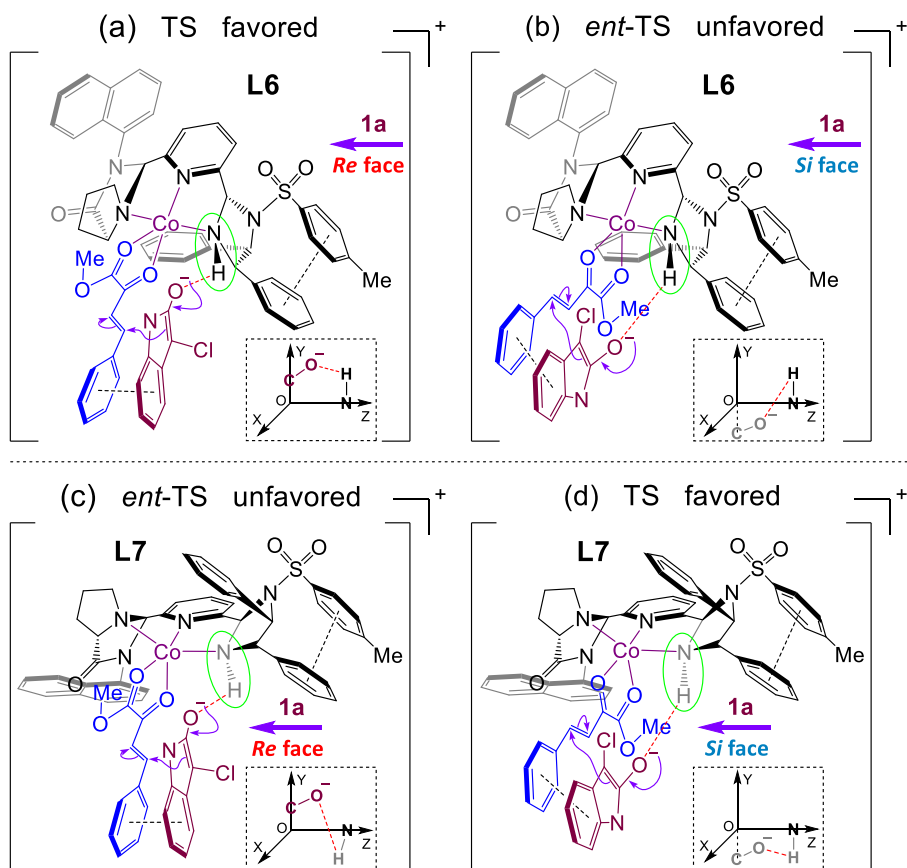

**Figure S6.** Proposed enantio-determining transition states for two chiral ligands.

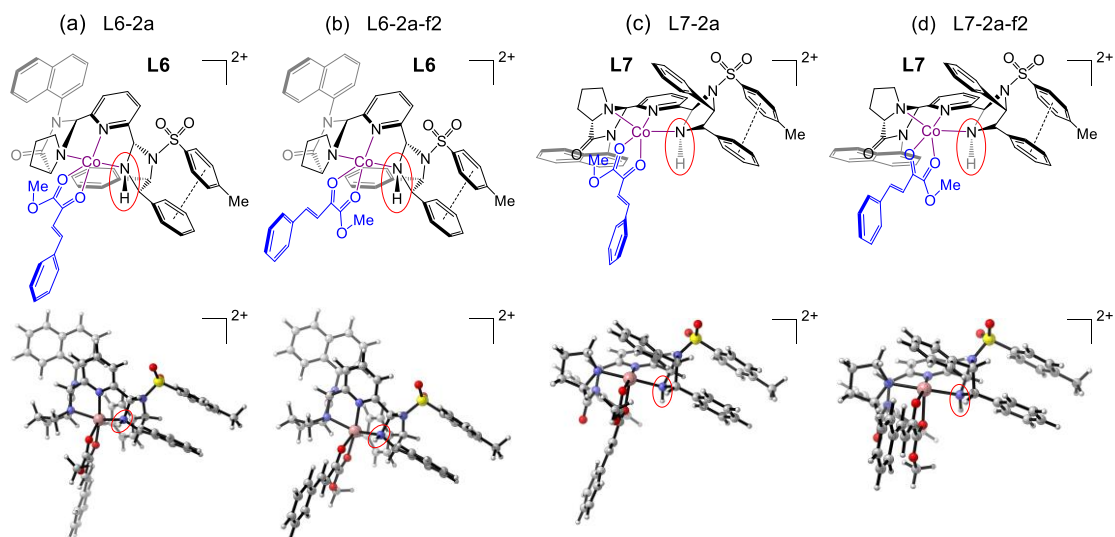

**Figure S7.** DFT-optimized structures of complexes between chiral ligands and substrate **2a** at the M06-2X-D3/Def2-SVP level.

## Cartesian coordinate for DFT calculation

### L6-2a

|    |             |             |             |
|----|-------------|-------------|-------------|
| Co | 0.43020800  | 0.44665500  | 0.76177600  |
| C  | -0.78696200 | -2.15540200 | 1.52511200  |
| C  | -0.84350300 | -3.45462000 | 2.01943300  |
| C  | 0.35865900  | -4.12087200 | 2.26171300  |
| C  | 1.57245400  | -3.48434300 | 2.00311000  |
| C  | 1.53924900  | -2.18439100 | 1.50793100  |
| H  | -1.80693300 | -3.93719500 | 2.17649600  |
| H  | 0.34750900  | -5.14141200 | 2.64646100  |
| H  | 2.52733900  | -3.98698600 | 2.16613100  |
| C  | -2.00987600 | -1.32308100 | 1.15950200  |
| H  | -2.87262400 | -1.64815600 | 1.76523600  |
| N  | 0.38393700  | -1.55862800 | 1.29062700  |
| N  | -2.31424800 | -1.37582300 | -0.26536100 |
| C  | 2.78927600  | -1.42782700 | 1.10311400  |
| H  | 3.60597900  | -1.71941000 | 1.79146500  |
| C  | 3.68022200  | -0.60817400 | -0.90894300 |
| C  | 4.66025500  | 1.25101500  | 0.57075100  |
| H  | 5.55533300  | 0.97582600  | -0.00282900 |
| H  | 4.56771100  | 2.34512600  | 0.53040900  |
| C  | -2.37242200 | -0.05358700 | -0.87121400 |
| N  | 2.59024100  | 0.05125500  | 1.11651400  |
| O  | 4.23291100  | -0.58316100 | -1.97215300 |
| C  | 3.39552300  | 0.59638100  | -0.02692100 |
| H  | 2.80869700  | 1.31272700  | -0.61845500 |
| N  | 3.16235600  | -1.71134600 | -0.26958900 |
| C  | 4.67730700  | 0.77093600  | 2.02566600  |
| H  | 5.17306100  | -0.20775300 | 2.11762300  |
| C  | 3.18867600  | 0.65017400  | 2.33895000  |
| H  | 2.75742700  | 1.65185500  | 2.47917000  |
| H  | 2.93483700  | 0.04592500  | 3.22122200  |
| H  | 5.19457400  | 1.46146600  | 2.70292600  |
| H  | -3.22968000 | 0.00916800  | -1.55926600 |
| C  | -2.60050000 | 0.82844500  | 0.37659200  |
| H  | -2.20271100 | 1.84340500  | 0.21376800  |
| N  | -1.70725600 | 0.11656500  | 1.31396400  |
| H  | -1.81920400 | 0.42517700  | 2.28070000  |
| S  | -3.14286000 | -2.68444400 | -0.92759500 |
| O  | -2.61065100 | -2.83499500 | -2.26295500 |
| O  | -3.01461400 | -3.70459500 | 0.09959600  |
| C  | -4.82590000 | -2.17230900 | -1.04109900 |
| C  | -5.30779100 | -1.68357400 | -2.25388800 |
| C  | -5.63805700 | -2.25874200 | 0.09265500  |
| C  | -6.62984500 | -1.24821600 | -2.31980100 |
| H  | -4.66000800 | -1.67149000 | -3.13229400 |
| C  | -6.95208100 | -1.82155000 | 0.00234000  |
| H  | -5.25135000 | -2.69082000 | 1.01710700  |
| C  | -7.46677600 | -1.30714700 | -1.19928100 |
| H  | -7.02324400 | -0.87087600 | -3.26543700 |
| H  | -7.60151200 | -1.88823900 | 0.87765000  |
| C  | -8.89876300 | -0.85797800 | -1.27371800 |
| H  | -9.16900900 | -0.25741200 | -0.39348900 |
| H  | -9.09121500 | -0.26715900 | -2.17762900 |
| H  | -9.57135500 | -1.72880900 | -1.29158400 |
| C  | -1.09744500 | 0.31881700  | -1.61463600 |
| C  | -0.98142600 | 1.58435800  | -2.20707300 |
| C  | -0.05779500 | -0.60831500 | -1.77891900 |
| C  | 0.15650600  | 1.92084800  | -2.93546700 |
| H  | -1.80017300 | 2.30409600  | -2.11997900 |
| C  | 1.08411700  | -0.26660800 | -2.51365000 |
| H  | -0.20014800 | -1.62592500 | -1.41177700 |
| C  | 1.19835700  | 1.00096100  | -3.08136600 |
| H  | 0.21995700  | 2.89996400  | -3.41356300 |
| H  | 1.86624200  | -1.00752300 | -2.68543700 |
| H  | 2.08774800  | 1.25075600  | -3.66219200 |
| C  | -4.05590300 | 0.92088900  | 0.80554700  |
| C  | -4.48455700 | 0.60308000  | 2.09678800  |



|   |             |             |             |
|---|-------------|-------------|-------------|
| C | -4.99347700 | 1.40730900  | -0.11439100 |
| C | -5.82192500 | 0.76771000  | 2.46386800  |
| H | -3.78779400 | 0.22386400  | 2.84831900  |
| C | -6.32590000 | 1.57464300  | 0.24986300  |
| H | -4.68198400 | 1.67267300  | -1.12824500 |
| C | -6.74398900 | 1.25660000  | 1.54319300  |
| H | -6.13878600 | 0.51648400  | 3.47681900  |
| H | -7.04132400 | 1.95777000  | -0.47941600 |
| H | -7.78704900 | 1.39306000  | 1.83226700  |
| C | 7.12436100  | -4.94343500 | -0.00013100 |
| C | 6.10127600  | -5.63561400 | -0.59951000 |
| C | 4.84657400  | -5.01306600 | -0.84358800 |
| C | 4.66384400  | -3.65303500 | -0.45555100 |
| C | 5.74301900  | -2.95868700 | 0.15560000  |
| C | 6.94267400  | -3.59038200 | 0.37851700  |
| H | 3.93415200  | -6.75057800 | -1.76432700 |
| H | 8.08370000  | -5.42942300 | 0.17942600  |
| H | 6.23804800  | -6.67512700 | -0.90254500 |
| C | 3.77640800  | -5.71201700 | -1.46789200 |
| C | 3.39284300  | -3.05363400 | -0.70535700 |
| H | 5.62601800  | -1.90718200 | 0.42726400  |
| H | 7.76790500  | -3.04649200 | 0.83971200  |
| C | 2.37655000  | -3.75413000 | -1.31112200 |
| C | 2.56954000  | -5.10000800 | -1.70166200 |
| H | 1.41603300  | -3.26371100 | -1.48128000 |
| H | 1.75770300  | -5.64127200 | -2.18720700 |
| C | 2.36848800  | 8.67098300  | -0.79424400 |
| C | 1.97474500  | 7.44946900  | -0.27612100 |
| C | 1.97292700  | 6.29831800  | -1.09781600 |
| C | 2.37623700  | 6.41344400  | -2.44673700 |
| C | 2.77130800  | 7.63996400  | -2.96135100 |
| C | 2.76675400  | 8.76644600  | -2.13502500 |
| H | 2.36933000  | 9.55920100  | -0.16229100 |
| H | 1.66433200  | 7.38240000  | 0.76730400  |
| H | 2.37760600  | 5.52591100  | -3.08310600 |
| H | 3.08338400  | 7.72514500  | -4.00224000 |
| H | 3.07642100  | 9.73255200  | -2.53692100 |
| C | 1.57653800  | 5.00658900  | -0.61614800 |
| C | 1.17559400  | 4.67282100  | 0.65533400  |
| H | 1.59728500  | 4.18720300  | -1.34468300 |
| H | 1.11741700  | 5.39489600  | 1.46829100  |
| C | 0.82496100  | 3.32787600  | 0.93651200  |
| O | 0.82230200  | 2.38020300  | 0.13061300  |
| C | 0.41103200  | 2.92093600  | 2.35752900  |
| O | 0.20649900  | 1.73991400  | 2.58617600  |
| O | 0.32058400  | 3.88100200  | 3.21794200  |
| C | -0.05660100 | 3.55251500  | 4.56982700  |
| H | -1.07339300 | 3.14211500  | 4.57277300  |
| H | -0.01449000 | 4.49132400  | 5.12591300  |
| H | 0.64824400  | 2.81843300  | 4.97753000  |

#### L6-2a-f2

|    |             |             |             |
|----|-------------|-------------|-------------|
| Co | -0.33068700 | 0.74002500  | 0.41673900  |
| C  | -0.02700300 | -1.06859300 | -1.91512700 |
| C  | -0.37115100 | -1.69813400 | -3.10699000 |
| C  | -1.68991300 | -1.59234200 | -3.55167000 |
| C  | -2.62322500 | -0.87598800 | -2.80257400 |
| C  | -2.19604900 | -0.27759300 | -1.62109600 |
| H  | 0.37010600  | -2.28322800 | -3.64919100 |
| H  | -1.99154900 | -2.07799000 | -4.48055900 |
| H  | -3.66547600 | -0.79399900 | -3.11574200 |
| C  | 1.35095800  | -1.14752700 | -1.26866000 |
| H  | 2.11556400  | -1.32065800 | -2.04471500 |
| N  | -0.93135200 | -0.37847700 | -1.21658000 |
| N  | 1.41517000  | -2.16549300 | -0.22667800 |
| C  | -3.14001900 | 0.44374100  | -0.67837900 |
| H  | -3.91129200 | 0.95242700  | -1.28844000 |
| C  | -3.94145100 | 0.09076600  | 1.49994400  |
| C  | -4.00050600 | 2.65495000  | 1.63455200  |

|   |             |             |             |
|---|-------------|-------------|-------------|
| H | -4.99697200 | 2.42265200  | 2.03325600  |
| H | -3.53052200 | 3.36954600  | 2.32466500  |
| C | 1.85522800  | -1.62618100 | 1.05181500  |
| N | -2.43520200 | 1.42386600  | 0.20127100  |
| O | -4.58742000 | -0.35068100 | 2.40750700  |
| C | -3.13577100 | 1.38012100  | 1.52791100  |
| H | -2.41652700 | 1.30387500  | 2.35553200  |
| N | -3.76258800 | -0.47280300 | 0.25737200  |
| C | -4.00959700 | 3.21845600  | 0.21007200  |
| H | -4.80266000 | 2.75466100  | -0.39661500 |
| C | -2.63158300 | 2.81047800  | -0.30206800 |
| H | -1.86200300 | 3.45598300  | 0.14438900  |
| H | -2.50000800 | 2.83932200  | -1.39277600 |
| H | -4.16665200 | 4.30342100  | 0.17507100  |
| H | 2.57031800  | -2.31550900 | 1.52669700  |
| C | 2.55924200  | -0.33112300 | 0.59144000  |
| H | 2.53857300  | 0.43002100  | 1.38818300  |
| N | 1.60844900  | 0.06804700  | -0.46638000 |
| H | 1.94957500  | 0.84052300  | -1.04045800 |
| S | 1.60761900  | -3.79345200 | -0.61180800 |
| O | 0.87088600  | -4.51405900 | 0.40211300  |
| O | 1.26577400  | -3.83652000 | -2.02377600 |
| C | 3.32631200  | -4.13104900 | -0.41324900 |
| C | 3.77476700  | -4.70427900 | 0.77505100  |
| C | 4.20322300  | -3.80852800 | -1.45219300 |
| C | 5.14031200  | -4.93414600 | 0.93093600  |
| H | 3.05811000  | -4.98622400 | 1.54854200  |
| C | 5.55847100  | -4.04908600 | -1.27512000 |
| H | 3.82112100  | -3.40620800 | -2.39183300 |
| C | 6.04827400  | -4.60980400 | -0.08385500 |
| H | 5.50497900  | -5.39031400 | 1.85304900  |
| H | 6.25609900  | -3.80890800 | -2.08007500 |
| C | 7.51855800  | -4.87685100 | 0.07398400  |
| H | 8.11399500  | -4.02323100 | -0.27998600 |
| H | 7.78246300  | -5.08321000 | 1.11845900  |
| H | 7.81437200  | -5.75035900 | -0.52644400 |
| C | 0.70561500  | -1.35182300 | 2.01128300  |
| C | 0.96442500  | -0.77333600 | 3.26276600  |
| C | -0.60345500 | -1.75061300 | 1.70358700  |
| C | -0.06623900 | -0.58189900 | 4.17925200  |
| H | 1.98811900  | -0.49881600 | 3.53347700  |
| C | -1.63538900 | -1.56483700 | 2.63118200  |
| H | -0.77981300 | -2.29919400 | 0.77714300  |
| C | -1.37157500 | -0.96868100 | 3.86270600  |
| H | 0.15162600  | -0.15370500 | 5.15908100  |
| H | -2.63984700 | -1.92929600 | 2.41145800  |
| H | -2.18159800 | -0.83810900 | 4.58207900  |
| C | 3.99339300  | -0.54515600 | 0.13501700  |
| C | 4.45549000  | -0.13457300 | -1.11779100 |
| C | 4.90166300  | -1.12258900 | 1.03158400  |
| C | 5.79689500  | -0.29726700 | -1.47033400 |
| H | 3.78347300  | 0.32635500  | -1.84566300 |
| C | 6.23934400  | -1.28276800 | 0.68369700  |
| H | 4.56828500  | -1.44348900 | 2.02211000  |
| C | 6.69165700  | -0.86828800 | -0.57015800 |
| H | 6.14096300  | 0.03092700  | -2.45188800 |
| H | 6.93272600  | -1.73226300 | 1.39621400  |
| H | 7.74129200  | -0.98806500 | -0.84233300 |
| C | -8.52771500 | -1.22130600 | -1.46493600 |
| C | -7.88923700 | -2.43344800 | -1.55455700 |
| C | -6.53890600 | -2.57745700 | -1.13344100 |
| C | -5.85274800 | -1.44008900 | -0.61438800 |
| C | -6.54130000 | -0.19981300 | -0.52552200 |
| C | -7.84633900 | -0.09451600 | -0.94232600 |
| H | -6.40377700 | -4.68845400 | -1.60727300 |
| H | -9.56462400 | -1.12270800 | -1.78722200 |
| H | -8.41181300 | -3.30771200 | -1.94659900 |
| C | -5.86252100 | -3.82635000 | -1.21333000 |
| C | -4.49582700 | -1.60996400 | -0.20555100 |

|   |             |             |             |
|---|-------------|-------------|-------------|
| H | -6.03715800 | 0.66985000  | -0.09817400 |
| H | -8.36942100 | 0.85905400  | -0.86090000 |
| C | -3.86802400 | -2.83006700 | -0.29381800 |
| C | -4.55921800 | -3.95530400 | -0.80060200 |
| H | -2.82750700 | -2.92079100 | 0.02395700  |
| H | -4.05124800 | -4.91781400 | -0.85833400 |
| C | 2.91233600  | 8.73094500  | -0.79197500 |
| C | 2.41064300  | 7.51692400  | -0.35534500 |
| C | 2.06030900  | 6.51660600  | -1.29120200 |
| C | 2.22947800  | 6.77315600  | -2.66939100 |
| C | 2.73175600  | 7.99224900  | -3.10251000 |
| C | 3.07237300  | 8.96908100  | -2.16402000 |
| H | 3.18346800  | 9.50223900  | -0.07092700 |
| H | 2.29031100  | 7.33855100  | 0.71388600  |
| H | 1.95971700  | 6.00286100  | -3.39481600 |
| H | 2.85982000  | 8.18721500  | -4.16725700 |
| H | 3.46783100  | 9.92849400  | -2.50145300 |
| C | 1.53457600  | 5.23946800  | -0.89749800 |
| C | 1.27403800  | 4.80053600  | 0.37626600  |
| H | 1.31042500  | 4.53707400  | -1.70830100 |
| H | 1.44562300  | 5.41647400  | 1.25783700  |
| C | 0.74411900  | 3.49684600  | 0.57611900  |
| O | 0.49450400  | 2.63893300  | -0.28327600 |
| C | 0.39820400  | 3.03792200  | 2.00138800  |
| O | -0.04849100 | 1.90934800  | 2.16016800  |
| O | 0.60215300  | 3.88595700  | 2.95066700  |
| C | 0.29009600  | 3.48161000  | 4.30049900  |
| H | -0.78012900 | 3.25268400  | 4.37198800  |
| H | 0.55469300  | 4.33139400  | 4.93295900  |
| H | 0.88104900  | 2.59449000  | 4.55638200  |

#### L7-2a

|    |             |             |             |
|----|-------------|-------------|-------------|
| C  | 1.09650200  | -2.50212900 | 0.75139900  |
| C  | 1.07124400  | -3.81016400 | 0.28281100  |
| C  | -0.03811800 | -4.21721900 | -0.46021200 |
| C  | -1.07220500 | -3.31837100 | -0.71796400 |
| C  | -0.98140800 | -2.03476000 | -0.18493700 |
| H  | 1.91360500  | -4.47993400 | 0.46447900  |
| H  | -0.09008800 | -5.23350400 | -0.85253000 |
| H  | -1.94875800 | -3.61317500 | -1.29222600 |
| C  | 2.32916900  | -1.86946700 | 1.36413500  |
| H  | 2.89041400  | -2.64420400 | 1.91761300  |
| C  | 3.66699800  | -0.04647600 | 0.70458000  |
| C  | 4.20089000  | -0.23410000 | 3.22626600  |
| H  | 5.11184400  | -0.65838700 | 2.78322100  |
| H  | 4.51027800  | 0.64392100  | 3.80526800  |
| N  | 0.07965100  | -1.66913000 | 0.53434800  |
| N  | 2.01178000  | -0.71221500 | 2.24944800  |
| C  | -2.03692100 | -0.95110400 | -0.38149500 |
| H  | -2.49872100 | -1.08959700 | -1.37708300 |
| O  | 4.36420100  | 0.68247600  | 0.05033400  |
| C  | 3.18798300  | 0.18664200  | 2.12845200  |
| H  | 2.89301700  | 1.23661300  | 2.25361400  |
| N  | -1.42573200 | 0.38713600  | -0.21921300 |
| C  | -2.50113100 | 1.30492200  | 0.20319700  |
| H  | -2.04155900 | 2.17339600  | 0.70093300  |
| N  | 3.15168500  | -1.26042900 | 0.32614700  |
| N  | -3.06156300 | -0.92033300 | 0.65395000  |
| C  | 3.44628700  | -1.26202600 | 4.09451700  |
| H  | 3.80212600  | -2.28230500 | 3.89546900  |
| C  | 1.97951900  | -1.10458100 | 3.67992100  |
| H  | 1.50038000  | -0.28450400 | 4.23298600  |
| H  | 1.36834600  | -2.00900800 | 3.80907000  |
| Co | 0.15807700  | 0.22153200  | 1.36774300  |
| C  | 5.56762700  | -4.72549700 | -0.30146600 |
| C  | 4.84054500  | -3.57875000 | -0.08852500 |
| C  | 4.09186300  | -2.99385700 | -1.14641200 |
| C  | 4.12535800  | -3.59698200 | -2.43838900 |
| C  | 4.88768300  | -4.78326400 | -2.62298200 |

|   |             |             |             |
|---|-------------|-------------|-------------|
| C | 5.58573500  | -5.33900800 | -1.57923900 |
| H | 6.14891000  | -5.16179200 | 0.51182100  |
| H | 4.86240400  | -3.09018700 | 0.88758900  |
| C | 3.29356400  | -1.82605100 | -0.97552100 |
| C | 3.40758500  | -2.99533200 | -3.50854000 |
| H | 4.91241500  | -5.24262600 | -3.61275400 |
| H | 6.16867100  | -6.24769100 | -1.73207200 |
| C | 2.67536900  | -1.84902100 | -3.31414100 |
| C | 2.60576400  | -1.26512500 | -2.02711000 |
| H | 3.45240200  | -3.46138000 | -4.49455200 |
| H | 2.13613100  | -1.39394000 | -4.14537400 |
| H | 2.00186400  | -0.37394000 | -1.83970800 |
| H | -0.95120400 | 0.69770000  | -1.06964900 |
| C | -3.42599500 | 1.81535200  | -0.88549900 |
| C | -4.38091100 | 2.77359600  | -0.52046900 |
| C | -3.34349400 | 1.42108200  | -2.22185800 |
| C | -5.23009200 | 3.33112600  | -1.47016100 |
| H | -4.45226800 | 3.10057500  | 0.52100900  |
| C | -4.20021700 | 1.97454300  | -3.17665300 |
| H | -2.60453400 | 0.68747400  | -2.55125800 |
| C | -5.13892500 | 2.93263500  | -2.80531500 |
| H | -5.95927900 | 4.08519200  | -1.17127500 |
| H | -4.12465800 | 1.65559200  | -4.21723000 |
| H | -5.79548600 | 3.37615600  | -3.55517200 |
| C | -3.18856500 | 0.40216500  | 1.25449700  |
| H | -4.24804900 | 0.66902200  | 1.37782800  |
| C | -2.49272900 | 0.49641400  | 2.60279600  |
| C | -2.58748000 | 1.68704700  | 3.33552800  |
| C | -1.78797600 | -0.58651700 | 3.14584700  |
| C | -1.98809000 | 1.80010300  | 4.58487800  |
| H | -3.16613500 | 2.52370300  | 2.93388600  |
| C | -1.19129200 | -0.46859000 | 4.40980900  |
| H | -1.81200200 | -1.54968200 | 2.63069600  |
| C | -1.28091500 | 0.72197600  | 5.12449900  |
| H | -2.09489800 | 2.72232500  | 5.15835500  |
| H | -0.70191500 | -1.33505800 | 4.85596200  |
| H | -0.83783900 | 0.80016500  | 6.11823200  |
| S | -4.40496700 | -1.93829800 | 0.52893200  |
| O | -3.82915900 | -3.21637300 | 0.15565700  |
| O | -5.13203000 | -1.71034700 | 1.75528300  |
| C | -5.33971900 | -1.33211200 | -0.83896300 |
| C | -6.26821800 | -0.31015500 | -0.62731800 |
| C | -5.12568700 | -1.87193800 | -2.10698800 |
| C | -6.96431000 | 0.19356700  | -1.71826400 |
| H | -6.46286000 | 0.05571000  | 0.38249300  |
| C | -5.83654500 | -1.35321900 | -3.18609000 |
| H | -4.44072200 | -2.71117600 | -2.23564700 |
| C | -6.75847700 | -0.31405100 | -3.01086100 |
| H | -7.69619300 | 0.98948600  | -1.56592500 |
| H | -5.68644700 | -1.77567500 | -4.18134100 |
| C | -7.54321700 | 0.23014400  | -4.17064400 |
| H | -8.56721400 | -0.17322700 | -4.16003100 |
| H | -7.62451700 | 1.32441500  | -4.11272600 |
| H | -7.08721900 | -0.04140000 | -5.13081900 |
| H | 3.57877000  | -1.08668900 | 5.16882100  |
| C | 5.56915900  | 5.56770700  | -2.68293400 |
| C | 4.54742900  | 4.96943000  | -1.96600500 |
| C | 4.31429500  | 3.58094200  | -2.09317100 |
| C | 5.13448400  | 2.81453800  | -2.95008800 |
| C | 6.16404000  | 3.41808300  | -3.65815700 |
| C | 6.37762700  | 4.79226200  | -3.52592000 |
| H | 5.74668800  | 6.63957200  | -2.59438500 |
| H | 3.91564900  | 5.57631900  | -1.31591300 |
| H | 4.96102000  | 1.73918400  | -3.02905300 |
| H | 6.80288500  | 2.82522500  | -4.31269700 |
| H | 7.18367300  | 5.26979800  | -4.08545600 |
| C | 3.28448500  | 2.89719000  | -1.36982400 |
| C | 2.50107600  | 3.39718200  | -0.35256100 |
| H | 3.13748100  | 1.84412000  | -1.62460400 |

|   |             |            |             |
|---|-------------|------------|-------------|
| H | 2.60760600  | 4.40924000 | 0.03502500  |
| C | 1.61052500  | 2.52125300 | 0.30460200  |
| O | 1.31881600  | 1.35177900 | -0.01620900 |
| C | 0.94930200  | 2.95783900 | 1.61855300  |
| O | 0.32075300  | 2.12527900 | 2.26471100  |
| O | 1.10926900  | 4.18658400 | 1.97354600  |
| C | 0.50605900  | 4.62024400 | 3.20924400  |
| H | 0.74987700  | 5.68055700 | 3.30190100  |
| H | -0.57795700 | 4.46398200 | 3.15625900  |
| H | 0.92673100  | 4.04194500 | 4.04050500  |

**L7-2a-f2**

|    |             |             |             |
|----|-------------|-------------|-------------|
| C  | -0.76816400 | -2.69233000 | -1.21730000 |
| C  | -0.31851200 | -3.97165500 | -1.52076200 |
| C  | 1.04664900  | -4.23339300 | -1.39175200 |
| C  | 1.91043400  | -3.22824600 | -0.95975100 |
| C  | 1.38030500  | -1.96714900 | -0.69954300 |
| H  | -1.02371100 | -4.75018400 | -1.81700900 |
| H  | 1.43586800  | -5.22753200 | -1.61451300 |
| H  | 2.97937400  | -3.40597200 | -0.85438400 |
| C  | -2.23583200 | -2.33285000 | -1.11251000 |
| H  | -2.80877700 | -2.94052900 | -1.83628000 |
| C  | -3.54777100 | -1.52880400 | 0.66617900  |
| C  | -4.91461500 | -0.94605500 | -1.44313600 |
| H  | -5.38905800 | -1.88663700 | -1.13110100 |
| H  | -5.67907500 | -0.16479400 | -1.36387900 |
| N  | 0.07666400  | -1.73076900 | -0.84530000 |
| N  | -2.48506100 | -0.88087000 | -1.32322500 |
| C  | 2.20102200  | -0.77855600 | -0.21273800 |
| H  | 3.04304500  | -1.15862500 | 0.39511500  |
| O  | -4.04111800 | -1.38360900 | 1.75381000  |
| C  | -3.70676400 | -0.60750300 | -0.53086000 |
| H  | -3.74205700 | 0.44234800  | -0.21373000 |
| N  | 1.33506000  | 0.15698600  | 0.53704100  |
| C  | 1.96473800  | 1.48861900  | 0.45232500  |
| H  | 1.19347700  | 2.24946500  | 0.65119300  |
| N  | -2.71684800 | -2.53775300 | 0.25134300  |
| N  | 2.68846700  | 0.08862000  | -1.27666000 |
| C  | -4.32227200 | -1.05254000 | -2.86657900 |
| H  | -4.36200300 | -2.08748500 | -3.23225800 |
| C  | -2.87093200 | -0.57396400 | -2.72090400 |
| H  | -2.80409700 | 0.51597800  | -2.83938800 |
| H  | -2.16259000 | -1.04048900 | -3.42034800 |
| Co | -0.66573200 | 0.17064000  | -0.48638700 |
| C  | -3.97362100 | -6.53867900 | -0.55135300 |
| C  | -3.62891400 | -5.23776300 | -0.27157400 |
| C  | -2.69033500 | -4.94515300 | 0.75584200  |
| C  | -2.13413500 | -6.01792300 | 1.51317600  |
| C  | -2.51178800 | -7.35173600 | 1.19592200  |
| C  | -3.40284800 | -7.60799600 | 0.18309600  |
| H  | -4.70439100 | -6.75334900 | -1.33211400 |
| H  | -4.10582700 | -4.41883200 | -0.81336700 |
| C  | -2.26833700 | -3.61962500 | 1.06747400  |
| C  | -1.22983800 | -5.73000100 | 2.57213300  |
| H  | -2.08506000 | -8.17024200 | 1.77832200  |
| H  | -3.68779200 | -8.63435000 | -0.04980100 |
| C  | -0.87764000 | -4.43602100 | 2.86935600  |
| C  | -1.39140100 | -3.36786700 | 2.09687300  |
| H  | -0.82443900 | -6.56029400 | 3.15315100  |
| H  | -0.19389500 | -4.22853500 | 3.69281100  |
| H  | -1.10361600 | -2.33409800 | 2.29850700  |
| H  | 1.18263600  | -0.15012000 | 1.49973300  |
| C  | 3.14018800  | 1.74571300  | 1.37644000  |
| C  | 3.68068500  | 3.03849800  | 1.38310500  |
| C  | 3.67359600  | 0.78811000  | 2.24069400  |
| C  | 4.72663600  | 3.36920800  | 2.23780100  |
| H  | 3.26718000  | 3.80378200  | 0.71983000  |
| C  | 4.72961800  | 1.11584200  | 3.09481600  |
| H  | 3.27207100  | -0.22678400 | 2.27924800  |

|   |             |             |             |
|---|-------------|-------------|-------------|
| C | 5.25367100  | 2.40509000  | 3.09947100  |
| H | 5.12686400  | 4.38384600  | 2.23937900  |
| H | 5.13693600  | 0.35607700  | 3.76344800  |
| H | 6.06717000  | 2.66336200  | 3.77886100  |
| C | 2.32738400  | 1.48373400  | -1.05093100 |
| H | 3.18485400  | 2.14114500  | -1.25541300 |
| C | 1.15274500  | 1.92395900  | -1.91048700 |
| C | 0.70219200  | 3.24828800  | -1.81909400 |
| C | 0.54727100  | 1.05688200  | -2.83039100 |
| C | -0.32736700 | 3.70328200  | -2.63450200 |
| H | 1.18761400  | 3.93955300  | -1.12499700 |
| C | -0.48756200 | 1.52409900  | -3.65342300 |
| H | 0.96488400  | 0.05768600  | -2.97553600 |
| C | -0.92944600 | 2.83968600  | -3.55396500 |
| H | -0.64323100 | 4.74622900  | -2.57571100 |
| H | -0.91032500 | 0.86409100  | -4.41178300 |
| H | -1.71518100 | 3.20486400  | -4.21678200 |
| S | 4.11764000  | -0.30975800 | -2.08557300 |
| O | 3.97825400  | -1.73127400 | -2.33966700 |
| O | 4.22059500  | 0.68740500  | -3.12507500 |
| C | 5.40962700  | -0.08000600 | -0.90719700 |
| C | 5.96296500  | 1.19212500  | -0.74516200 |
| C | 5.83565700  | -1.16409400 | -0.13981600 |
| C | 6.93520700  | 1.37635600  | 0.22948400  |
| H | 5.65721700  | 2.01210400  | -1.39760100 |
| C | 6.81412300  | -0.95723200 | 0.82861500  |
| H | 5.43083700  | -2.15949400 | -0.32787300 |
| C | 7.37201000  | 0.31111500  | 1.03231200  |
| H | 7.37814100  | 2.36520300  | 0.36446900  |
| H | 7.16437500  | -1.80013400 | 1.42731600  |
| C | 8.44457900  | 0.52813100  | 2.06170000  |
| H | 8.44027500  | -0.26246500 | 2.82257100  |
| H | 9.43612100  | 0.52551900  | 1.58365000  |
| H | 8.32513800  | 1.50069600  | 2.55832000  |
| H | -4.86647900 | -0.44095400 | -3.59598600 |
| C | -5.37879600 | 6.98525000  | 1.76639800  |
| C | -4.65885600 | 5.80629900  | 1.67391500  |
| C | -3.95860900 | 5.49497100  | 0.48571000  |
| C | -4.00483700 | 6.39914700  | -0.59796900 |
| C | -4.72744200 | 7.57974200  | -0.50079900 |
| C | -5.41323500 | 7.87116200  | 0.68089300  |
| H | -5.91915600 | 7.22590300  | 2.68203900  |
| H | -4.63660400 | 5.12142700  | 2.52243900  |
| H | -3.46634500 | 6.16017600  | -1.51748400 |
| H | -4.76101900 | 8.27527100  | -1.33938400 |
| H | -5.98266600 | 8.79857600  | 0.76072700  |
| C | -3.19708600 | 4.28791500  | 0.33095800  |
| C | -3.02737000 | 3.28221200  | 1.25029800  |
| H | -2.69188400 | 4.14902600  | -0.63229900 |
| H | -3.47687500 | 3.29949800  | 2.24195200  |
| C | -2.23602900 | 2.15653500  | 0.90580800  |
| O | -1.65632700 | 1.96277400  | -0.17993100 |
| C | -2.04585200 | 1.01744500  | 1.92068800  |
| O | -1.35248200 | 0.06555000  | 1.58491800  |
| O | -2.62875500 | 1.16536000  | 3.05563500  |
| C | -2.52109600 | 0.10425500  | 4.03445400  |
| H | -3.06363400 | 0.46358000  | 4.91117100  |
| H | -2.98314600 | -0.79881800 | 3.61797100  |
| H | -1.46196400 | -0.05816200 | 4.26787500  |

## References

- 1 X.-B. Wang, Y. Tian, L. Zhou, M.-S. Xie, G.-R. Qu and H.-M. Guo, Rational Design of Chiral Tridentate Ligands: Bifunctional Cobalt(II) Complex/Hydrogen Bond for Enantioselective Michael Reactions, *Org. Lett.*, 2022, **24**, 3861-3866.
- 2 B.-Y. Xue, C.-Y. Hou, X.-B. Wang, M.-S. Xie and H.-M. Guo, Asymmetric synthesis of 7-membered-ring-bridged 3,4-fused tricyclic indoles *via* Friedel–Crafts alkylation/annulation, *Org. Chem. Front.*, 2023, **10**, 1910-1914.
- 3 H.-X. Wang, C. Yang, B.-Y. Xue, M.-S. Xie, Y. Tian, C. Peng and H.-M. Guo, Design of  $C_1$ -symmetric tridentate ligands for enantioselective dearomative [3 + 2] annulation of indoles with aminocyclopropanes, *Nat. Commun.*, 2023, **14**, 2270.
- 4 X.-Y. Wang, X.-B. Wang, Y. Tian, C. Peng, M.-S. Xie and H.-M. Guo, Cobalt-Catalyzed Asymmetric Dearomative [3 + 2] Annulation of Quinolines, Isoquinolines, and Pyridines, *ACS Catal.*, 2023, **13**, 11528-11540.
- 5 Y.-P. Wang, X.-P. Zhang, M.-S. Xie and H.-M. Guo, Cobalt(II)-Catalyzed Enantioselective Propargyl Claisen Rearrangement: Access to Allenyl-Substituted Quaternary  $\beta$ -Ketoesters, *Org. Lett.*, 2023, **25**, 7105-7109.
- 6 (a) J. H. Feng, X. Fu, Z. L. Chen, L. L. Lin, X. H. Liu and X. M. Feng, Efficient Enantioselective Synthesis of Dihydropyrans Using a Chiral  $N,N'$ -Dioxide as Organocatalyst, *Org. Lett.*, 2013, **15**, 2640-2643; (b) D. Belmessieri, L. C. Morrill, C. Simal, A. M. Z. Slawin and A. D. Smith, Organocatalytic Functionalization of Carboxylic Acids: Isothiourea-Catalyzed Asymmetric Intra- and Intermolecular Michael Addition–Lactonizations, *J. Am. Chem. Soc.*, 2011, **133**, 2714-2720.
- 7 Y. Huang, Y. Li, J. Sun, J. Li, Z. Zha and Z. Wang, Enantioselective Hetero-Diels–Alder Reaction and the Synthesis of Spiropyrrolidone Derivatives, *J. Org. Chem.*, 2018, **83**, 8464-8472.
- 8 (a) V. L. Reddy, P. S. Prathima, V. J. Rao and R. Bikshapathi, An efficient synthesis of versatile synthon 3-chlorooxindoles with NaCl/oxone, *New J. Chem.*, 2018, **42**, 20152-20155; (b) Y. Jian, P. Liang, X. Li, H. Shao and X. Ma, Controllable transformation of indoles using iodine(III) reagent, *Org. Biomol. Chem.*, 2023, **21**, 179-186.
- 9 Y. L. Kuang, B. Shen, L. Dai, Q. Yao, X. H. Liu, L. L. Lin and X. M. Feng, Diastereodivergent asymmetric Michael-alkylation reactions using chiral  $N,N'$ -dioxide/metal complexes, *Chem. Sci.*, 2018, **9**, 688-692.
- 10 J.-B. Wen and D.-M. Du, Squaramide-catalysed asymmetric cascade reactions of 2,3-dioxopyrrolidines with 3-chlorooxindoles, *Org. Biomol. Chem.*, 2020, **18**, 1647-1656.
- 11 (a) P. Hohenberg and W. Kohn, Inhomogeneous Electron Gas, *Phys. Rev.*, 1964, **136**, B864-B871; (b) W. Kohn and L. J. Sham, Self-Consistent Equations Including Exchange and Correlation Effects, *Phys. Rev.*, 1965, **140**, A1133-A1138.
- 12 M. J. Frisch, G. W. Trucks, H. B. Schlegel, G. E. Scuseria, M. A. Robb, J. R. Cheeseman, G. Scalmani, V. Barone, G. A. Petersson, H. Nakatsuji, X. Li, M. Caricato, A. V. Marenich, J.

- Bloino, B. G. Janesko, R. Gomperts, B. Mennucci, H. P. Hratchian, J. V. Ortiz, A. F. Izmaylov, J. L. Sonnenberg, D. Williams-Young, F. Ding, F. Lipparini, F. Egidi, J. Goings, B. Peng, A. Petrone, T. Henderson, D. Ranasinghe, V. G. Zakrzewski, J. Gao, N. Rega, G. Zheng, W. Liang, M. Hada, M. Ehara, K. Toyota, R. Fukuda, J. Hasegawa, M. Ishida, T. Nakajima, Y. Honda, O. Kitao, H. Nakai, T. Vreven, K. Throssell, J. A. Jr. Montgomery, J. E. Peralta, F. Ogliaro, M. J. Bearpark, J. J. Heyd, E. N. Brothers, K. N. Kudin, V. N. Staroverov, T. A. Keith, R. Kobayashi, J. Normand, K. Raghavachari, A. P. Rendell, J. C. Burant, S. S. Iyengar, J. Tomasi, M. Cossi, J. M. Millam, M. Klene, C. Adamo, R. Cammi, J. W. Ochterski, R. L. Martin, K. Morokuma, O. Farkas, J. B. Foresman, D. J. Fox, Gaussian 16, revision B.01, Gaussian, Inc.: Wallingford, CT, 2016.
- 13 (a) Y. Zhao and D. G. Truhlar, The M06 suite of density functionals for main group thermochemistry, thermochemical kinetics, noncovalent interactions, excited states, and transition elements: two new functionals and systematic testing of four M06-class functionals and 12 other functionals, *Theor. Chem. Acc.*, 2008, **120**, 215-241; (b) S. Grimme, Antony, J. Antony, S. Ehrlich and H. Krieg, A consistent and accurate ab initio parametrization of density functional dispersion correction (DFT-D) for the 94 elements H-Pu, *J. Chem. Phys.*, 2010, **132**, 154104.
- 14 F. Weigend and R. Ahlrichs, Balanced basis sets of split valence, triple zeta valence and quadruple zeta valence quality for H to Rn: Design and assessment of accuracy, *Phys. Chem. Chem. Phys.*, 2005, **7**, 3297-3305.
